# Supplementary material for: A systematic review of the influence of occupational organophosphate pesticides exposure on neurological impairment
Source: PubMed Central journal article supplement — BMJ Open. 2014 Jun 24;4(6):e004798. doi: 10.1136/bmjopen-2014-004798 (PMC4078784; doi:10.1136/bmjopen-2014-004798), 2014-06-24
Supplement: bmjopen-2014-004798.draft_revisions.pdf [file bmjopen-2014-004798.draft_revisions.pdf]

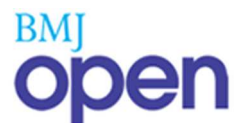

**A systematic review of the influence of occupational organophosphate pesticides exposure on neurologic impairment**

|                                 |                                                                                                                                                                                             |
|---------------------------------|---------------------------------------------------------------------------------------------------------------------------------------------------------------------------------------------|
| Journal:                        | <i>BMJ Open</i>                                                                                                                                                                             |
| Manuscript ID:                  | bmjopen-2014-004798                                                                                                                                                                         |
| Article Type:                   | Research                                                                                                                                                                                    |
| Date Submitted by the Author:   | 04-Jan-2014                                                                                                                                                                                 |
| Complete List of Authors:       | Takahashi, Noriko; Institute of Tropical Medicine, Nagasaki University, Pediatric infectious diseases<br>Hashizume, Masahiro; Institute of Tropical Medicine, Pediatric Infectious Diseases |
| <b>Primary Subject Heading</b>: | Epidemiology                                                                                                                                                                                |
| Secondary Subject Heading:      | Public health                                                                                                                                                                               |
| Keywords:                       | Epidemiology < TROPICAL MEDICINE, Public health < INFECTIOUS DISEASES, Environmental Health                                                                                                 |
|                                 |                                                                                                                                                                                             |

SCHOLARONE™  
Manuscripts

1  
2  
3  
4 Title: A systematic review of the influence of occupational organophosphate pesticides exposure on  
5  
6 neurologic impairment  
7

8  
9  
10 Authors:

11  
12 Noriko Furuoya<sup>1</sup>

13  
14 Masahiro Hashizume<sup>1</sup>

15  
16  
17  
18 Authors' Institutions:

19  
20  
21 <sup>1</sup> Department of Pediatric Infectious Diseases, Institute of Tropical Medicine, Nagasaki University,  
22  
23 1-12-4 Sakamoto, Nagasaki City, Nagasaki, 852-8523, Japan  
24  
25

26  
27 Address for correspondence:

28  
29  
30 Noriko Furuoya

31  
32 Department of Pediatric Infectious Diseases, Institute of Tropical Medicine, Nagasaki University

33  
34 1-12-4 Sakamoto, Nagasaki City, Nagasaki 852-8523, Japan

35  
36  
37  
38 Tel: (81) 95 819 7764 Fax: (81) 95 819 7844

39  
40  
41 E-mail: furuoyanoriko@gmail.com

42  
43  
44 Key words: Organophosphate, Pesticides, Central Nervous System, Neurologic, Impairment

45  
46  
47 Word count, main text: 4123

48  
49  
50 Number of Tables/Illustrations: 4

51  
52  
53 Number of References: 38

## ABSTRACT

**Background:** Organophosphate pesticides (OPs) are widely used: however only a few epidemiological studies have investigated the association between neurobehavioral or neuropsychological effects and occupational OP exposure.

**Objective:** The aim was to conduct a systematic review of the published literatures and to estimate whether or not there is a causal relationship between occupational exposure to OPs and either neurologic impairment or depressive symptoms.

**Method:** An extensive search of various literature databases was conducted, and the relevant publications were then manually searched. All the relevant data was extracted from the selected articles and synthesized for analysis. Meta-analysis was implemented using mean scores of the neurologic tests and depressive symptoms.

**Results:** Twenty-three studies that met inclusion and exclusion criteria were selected for analysis. Of the selected studies, 16 were cross-sectional and the remaining seven were cohort and nested case-control studies. The geographical areas included in the studies were USA (nine studies), UK (four studies), Africa (four studies), Asia (three studies), Europe (two studies) and one in South America. The Each study used different exposure and outcome assessments such as neurologic scores and depressive symptoms, thus making it difficult to compare the results exactly. The most showed that the exposed groups had poorer results than the unexposed groups; however, the evidence based on the results of the meta-analysis was weak.

1  
2  
3  
4 **Conclusion:** The findings of this literature review indicate that there might be a causal relationship  
5  
6  
7 between occupational exposure to OPs and neurological impairment or depressive symptoms.  
8  
9

## 10 11 12 **ARTICLE SUMMARY**

### 13 14 **Article Focus**

- 15 ● To systematically review epidemiological studies which examine adverse effects on human  
16  
17  
18  
19  
20  
21  
22  
23  
24  
25  
26  
27  
28  
29  
30  
31  
32  
33  
34  
35  
36  
37  
38  
39  
40  
41  
42  
43  
44  
45  
46  
47  
48  
49  
50  
51  
52  
53  
54  
55  
56  
57  
58  
59  
60  
● To systematically review epidemiological studies which examine adverse effects on human  
central nervous system by organophosphate pesticides (OPs).

### **Key messages**

- OPs have been widely used all over the world for agricultural or industrial use.
- There are a plenty of studies which have examined acute health problems by OPs, however, few  
studies have investigated negative effects by occupational OPs exposure.

### **Strengths and limitations of this study**

- The article represents a systematic review of epidemiological studies on adverse effects on  
human central nervous system by occupational OPs exposure, with quality appraisal of each  
study.
- The meta-analysis was limited because each study used various outcome assessments.
- There is a difficulty to judge negative effects by only OPs, because mixed pesticides were used  
in some studies.

## INTRODUCTION

Ever since organophosphate pesticides (OPs) were developed, they have been used for combating insects for public health purposes and to support agricultural productivity and manufacturing processes. Pesticides are also well-known as one of the leading suicide methods, and approximately three million cases of pesticide poisoning occur every year around the world. This is especially prevalent in Asian nations including Sri Lanka, China, and Malaysia (1). For this reason, a large number of epidemiological studies have investigated the relationship between high level OP exposure such as pesticide poisoning and accidents and acute health effects and it has been reported that high level exposure is significantly related to neurological or neuropsychological impairment (2, 3). In contrast, few studies that have investigated associations between occupational or cumulative OPs exposure and negative effects on human health are available. Although some research has examined the negative influence to young children by cumulative OPs exposure (4, 5) or others have investigated relationships between reproductive health and occupational OPs exposure(6-8), However, there are very few studies which have assessed the relationships between occupational OPs exposure and neurologic or mental problems using epidemiological research. In this systematic review, the epidemiological evidence for the relationship between occupational OPs exposure and mental and neuropsychological aggression is summarized, and some of the limitations associated with the studies discussed.

## Materials and Methods

### Searching strategy for identification of published studies

A search for observational studies was carried out. Geographical and time restrictions were not imposed. Population-based case-control studies were excluded from the systematic review because it is difficult to assess accurate exposure-doses. Currently, various pesticides including OPs are easily-available for everyone, and some people have a possibility of using pesticides for personal use. However, it is almost impossible to comprehend exactly past records of pesticides use every person. The search was limited to studies in humans and to reports published in English, and the review was limited to epidemiological studies. Studies investigating OP exposure through food and water contamination were also excluded. A search of the following four databases was carried out:

1. EMBASE Classic plus EMBASE (1947 to 2010 July 09),
2. Ovid MEDLINE(R) (1950 to June Week 5 2010),
3. Global Health (1910 to June 2010), and
4. PsycINFO (1806 to July Week 1 2010).

A combination of free-text terms and explore terms was used to identify relevant articles. For exposure, the following search keywords were used: organophosphate\*, organophosphorous, pesticide\*, or insecticide\*, organophosphate pesticide (explore map term), pesticide (explore map term). For outcome, the following search keywords were used: neuro\*, psychiatr\*, psycholog\*, mental health, mental illness, mental disorder, depressi\*, depression (Epidemiology) (explore map

1  
2  
3  
4 term) and mental health (explore map term). For subjects, the following search keywords were used:  
5  
6  
7 occupation\*, agricultu\*, or farm\*. For study design, the following search keywords were used:  
8  
9  
10 epidemiolog\*, cohort, or cross-sectional, case-control, or Epidemiology (explore map term) were  
11  
12 used as keywords. An initial systematic search in the titles and abstracts was conducted using a  
13  
14 combination of all these search terms. A second manual search of the reference lists from the selected  
15  
16 relevant articles was performed to explore or retrieve articles found in the initial search.  
17  
18  
19  
20  
21  
22  
23

#### 24 **Criteria for selecting studies for the review**

25  
26  
27 Only original research articles meeting the inclusion and exclusion criteria described below were  
28  
29 used in the final result.  
30  
31  
32  
33  
34  
35

#### 36 **Inclusion criteria**

##### 37 38 1. Study design:

- 39  
40  
41 a) Must be observational studies: cross-sectional, cohort, and case-control studies.  
42  
43  
44 b) Studies must have both exposed and unexposed groups.  
45  
46

##### 47 2. Subjects:

- 48  
49  
50 a) The subjects in the exposed group either must use OPs occupationally, or there must be a  
51  
52 probability of being exposed to OPs during their work.  
53  
54  
55  
56 b) The families of occupational OP users can be treated as subjects.  
57  
58  
59  
60

1  
2  
3  
4 3. Exposure

5  
6  
7 a) Subjects must be exposed to OPs for at least one month.

8  
9  
10 b) Seasonal workers who used OPs for more than one month must be included.

11  
12  
13 4. Outcome

14  
15 Studies must have carried out some tests to assess damage of the CNS (Central Nervous System) or  
16  
17  
18 have conducted a survey or an interview to identify depressive symptoms.

19  
20  
21 5. Exposure-outcome association

22  
23  
24 Results must be reported as some type of relative risks or mean scores.  
25  
26  
27  
28  
29

30 Exclusion criteria

31  
32  
33 1. Study design

34  
35 Experimental and laboratory based studies including animal studies were excluded.

36  
37  
38 Population-based case-control studies were excluded.  
39  
40

41  
42 2. Subjects

43  
44 Studies of mainly patients of pesticide poisoning were not excluded.  
45  
46

47  
48 3. Exposure

49  
50 Studies which did not specify the type of pesticides were excluded.  
51  
52

53  
54 4. Outcome

55  
56 Studies examining damage of the peripheral nervous system due to OPs exposure were excluded.  
57  
58  
59  
60



1  
2  
3  
4 5. Language  
5  
6

7 Studies published in a language other than English were excluded.  
8  
9

10  
11  
12 **Definitions**  
13

14  
15 Definition of cumulative exposure  
16

17  
18 a) People who use OPs in their jobs for at least one month and have a probability of inhaling  
19  
20 ambient OPs and absorbing OPs by spraying and touching.  
21  
22

23  
24 b) Families of OP users were included as subjects, because they may have been exposed to OPs by  
25  
26 washing clothes contaminated by OPs and/or by touching OP users.  
27  
28

29  
30 Definition of poor mental health  
31

32  
33 A) Neurological or neuropsychological impairment  
34

35  
36 a) People who had poorer results in neurological or neuropsychological battery tests than healthy  
37  
38 people of the same age.  
39

40  
41 b) People who had short-memory loss, for example, people who had experienced memory loss of  
42  
43 six to three months duration.  
44  
45

46  
47 B) Depressive Symptom  
48

49  
50 c) People who, regardless of their age, had chronic depressive symptoms including headache,  
51  
52 fatigue, dizziness, sleepless and eye problems.  
53  
54

55  
56 d) People who were diagnosed with depression by clinical doctors.  
57  
58

### Study selection process

Using the search terms listed above, a total of 592 references were obtained: 276 from Embase Classic + Embase, 16 from PsyINFO, 133 from Global Health, and 167 from Medline. However 197 of 592 references were duplicates. Of these 395 unique references that remained, 63 were not in English, and 32 were animal studies. A manual search of the titles and abstracts of the remaining 300 references excluded a further 268 studies. The 32 remaining articles were fully reviewed, after which 13 studies were deemed to meet inclusion and exclusion criteria (9-21). In addition, 10 articles identified by manual search were added to the systematic review (See Appendix A for flow of study inclusion and exclusion diagram). Finally, these 23 studies were identified and used for data extraction (22-31).

### Data extraction, synthesis and analysis

Data extraction forms were created to compare relevant data collected from each of the 23 studies. Extracted data included title, authors, year published, and the number of subjects in the exposed and unexposed groups, occupation, demographic information such as mean age, sex, smoking status, geographical area, inclusion and exclusion criteria such as first language, alcohol consumption, and injury experience, types of pesticides, exposure assessment, statistical methods, outcome assessment to measure the neurologic or neuropsychological ability, and results obtained. Tables containing the

1  
2  
3  
4 data that was obtained using the data extraction forms were constructed and analyzed. P-values and  
5  
6  
7 95 percent confidence intervals were elicited from the articles to judge statistical uncertainty. When a  
8  
9  
10 study had investigated depressive symptoms, the information was collected and a table was  
11  
12 constructed. Meta-analysis was carried out using mean scores of neuropsychological tests with  
13  
14 STATA version 11.0.  
15  
16  
17  
18  
19

### 20 21 **Quality appraisal**

22  
23  
24 The quality of the 23 studies was appraised using a scale that was adapted from the  
25  
26 ‘Newcastle/Ottawa Scale (NOS)’ (32) (The appraisal standard of NOS was shown in Appendix B).  
27  
28  
29 Based on the NOS, each study was evaluated using the point system. When a study included relevant  
30  
31  
32 information that could be associated to the NOS, one point was added. There are five items in  
33  
34  
35 cross-sectional studies and eight items in cohort and case control studies that can be related to the  
36  
37  
38 NOS. Therefore, cross-sectional studies assigned 5, 4, 3 or 0-2 points were evaluated as very good,  
39  
40  
41 good, satisfactory or unsatisfactory studies, respectively. Similarly, cohort/case-control studies with  
42  
43  
44 7-8, 5-6, 4 and 0-3 points were identified as very good, good, satisfactory or unsatisfactory,  
45  
46  
47 respectively.  
48  
49  
50  
51  
52

### 53 **RESULTS**

54  
55  
56 As a result of the search strategy described in the Materials and Methods section, 13 studies were  
57  
58  
59  
60

1  
2  
3  
4 identified from the database search and another 10 studies found after a manual search. A total of 23  
5  
6  
7 articles, published between 1975 and 2010, met the inclusion and exclusion criteria. A summary of  
8  
9  
10 the characteristics of the 23 selected articles is shown in Table 1.

### 11 12 13 14 15 **Study design and geographical area**

16  
17  
18 Of the selected studies, 16 were cross-sectional and the remaining seven were cohort and nested  
19  
20  
21 case-control studies. The geographical areas included in the studies were USA (nine studies), UK  
22  
23  
24 (four studies), Africa (four studies; two in South Africa, one in Egypt, and one in Kenya), Asia (three  
25  
26  
27 studies; two in India, and one in Sri Lanka), Europe (one in Spain and one in Poland) and one in  
28  
29  
30 South America (Ecuador, one study).

### 31 32 33 34 35 **Characteristics of subjects**

36  
37  
38 Because the subjects were limited to people who had the probability of being exposed by OPs, the  
39  
40  
41 majority of the participants were men. Most of the time, agricultural work such as pesticide  
42  
43  
44 application and farming is predominantly performed by men. Five out of the 23 studies included both  
45  
46  
47 male and female subjects; however, approximately 60 to 70 percent of the subjects were male (9, 21,  
48  
49  
50 27, 29, 33). Only one study used all female subjects in both the exposed and control groups (23). The  
51  
52  
53 mean age of the exposed subjects was in the thirties in 12 studies, in six studies the mean age was in  
54  
55  
56 the forties (9, 12, 16, 17, 24, 34) and in two studies the mean age was in the fifties (13, 21). The  
57  
58  
59  
60

1  
2  
3  
4 mean age in one study was in the twenties; however, the mean age was 29, very close to thirty (27).  
5  
6

7 One study did not report detailed demographic data of the participants (10).  
8  
9  
10

### 11 12 **Source of recruitment and sample size** 13

14  
15 Ten out of the 23 studies were on pesticide applicators including private, commercial, and tree, fruit,  
16  
17 and vegetable applicators. Four and three studies were on farmers and sheep farmers, respectively,  
18  
19 and, two were on factory workers and greenhouse workers. One study investigated depressive  
20  
21 symptoms in the spouses of OPs users. In the study by Korsak et al. the specific occupation of the  
22  
23 population in the study was not stated; however, the subjects had experienced occupational OPs  
24  
25 exposure (25). The number of subjects in the exposed group varied from 16 to 2,051, while the  
26  
27 control groups had a wider range, with the figure ranging from 16 to 27,023.  
28  
29  
30  
31  
32  
33  
34  
35  
36  
37  
38  
39  
40  
41  
42  
43  
44  
45  
46  
47  
48  
49  
50  
51  
52  
53  
54  
55  
56  
57  
58  
59  
60

Table 1 Reported findings in recent epidemiological studies regarding occupational low level OPs exposure and mental illness

|    | Author                        | Study Design | Country      | Exposed Population(No)                                                  | Chemical       | Exposed Assessment           | Comparison Group                                                              |
|----|-------------------------------|--------------|--------------|-------------------------------------------------------------------------|----------------|------------------------------|-------------------------------------------------------------------------------|
| 1  | Albers et al (9)              | CO           | USA          | Chemical workers(53)                                                    | OP             | Industrial HR,AChE<br>INH    | Similar workers, not exposed(60)                                              |
| 2  | Bazylewicz-Walczak et al (23) | CO           | Poland       | Greenhouse workers(26)                                                  | OP             | DR                           | Greenhouse workers, not exposed(25)                                           |
| 3  | Beseler et al (10)*           | NC/ CO       | USA          | Case**: Spouses of private applicators with depressive diagnoses(2,051) | OP             | QU or IN                     | Control: Spouses of private applicators without depressive diagnoses (27,023) |
| 4  | Cole et al (33)               | CR           | Ecuador      | Farmers, some applicators(144)                                          | OP,CAR,<br>FNG | IN, QU, AChE INH             | Local Population(72)                                                          |
| 5  | Daniell et al (20)            | CO           | USA          | Farm worker applicators(49)                                             | OP             | QU, AChE INH                 | Slaughterhouse workers(40)                                                    |
| 6  | Dassanayake et al (13)        | CR           | Sri Lanka    | Vegetable farm workers (38)                                             | OP             | N.A.                         | hospital labours(35)                                                          |
| 7  | Farahat et al (24)            | CR           | Egypt        | Farm workers(52)                                                        | OP             | AChE INH                     | Local Population(50)                                                          |
| 8  | Fiedler et al (34)            | CR           | USA          | Tree fruit farmers (57)                                                 | OP             | QU, lifetime exposure metric | Cranbury/blueberry growers(low exposed), hardware storeowners(unexposed) (42) |
| 9  | Korsak et al (25)             | CR           | USA          | Occupational exposure(16)                                               | OP, CAR,<br>OC | AChE INH                     | Local Population(low exposure)(16)                                            |
| 10 | Levin et al (26)*             | CR           | USA          | Pesticide applicators(24)                                               | OP             | IN, AChE INH                 | Farmers(24)                                                                   |
| 11 | London et al (18)             | CR           | South Africa | Fruit farm pesticide applicators(163)                                   | OP             | QU(job-matrix)               | Farm workers, not applicators(84)                                             |
| 12 | London et al(15)*             | CR           | South Africa | Fruit farm pesticide applicators(164)                                   | OP             | QU (job-matrix)              | Farm workers, not applicators(83)                                             |
| 13 | Maizish et al (27)            | CR           | USA          | Pesticide applicators(46)                                               | OP             | UM, DR                       | Non-applicators(56)                                                           |

|    |                          |    |       |                              |         |              |                                      |
|----|--------------------------|----|-------|------------------------------|---------|--------------|--------------------------------------|
| 14 | Misra et al 5(28)*       | PR | India | Pesticide applicators(22)    | OP      | AChE INH     | Hospital labours(20)                 |
| 15 | Ohayo-Mitoko et al (29)* | CO | Kenya | Farm worker applicators(256) | OP, CAR | AChE INH     | Farm workers(low exposure)(152)      |
| 16 | Rodnitzky et al (30)     | CR | USA   | Pesticide applicators(23)    | OP      | AChE INH     | Farmers(23)                          |
| 17 | Roldan-Tapia et al (14)  | CR | Spain | Greenhouse workers(40)       | OP, CAR | QU, AChE INH | Local Population(26)                 |
| 18 | Ross et al (21)          | CO | UK    | Sheep farmers(127)           | OP      | IN           | Police workers(78)                   |
| 19 | Srivastava et al(31)     | CR | India | Manufacture workers(59)      | OP      | AChE INH     | Manufacture workers, not exposed(17) |
| 20 | Steenland et al(11)      | CR | USA   | Termiticide applicators(191) | OP      | IN,UM        | Friends,<br>blue collar workers(189) |
| 21 | Stephens et al (12)      | CR | UK    | Sheep farmers(146)           | OP      | QU           | Quarry workers(143)                  |
| 22 | Stephens et al (17)      | CR | UK    | Sheep farmers(77)            | OP      | QU, UM       | Quarry workers(69)                   |
| 23 | Stephens et al (16)      | CR | UK    | Orchard applicators(37)      | OP      | IN,QU        | Construction workers,pig farmers(57) |

**Study Design** CR: Cross-sectional, CO: Cohort, NC: Nested Case-control, PR: Prospective study

**Chemical** OP: Organophosphates, OC: Organochlorines, CAR: Carbamates, FUN: Fungicides, AChE: Acetylcholinesterase

**Exposed Assessment:** AChE INH: AChE inhibition, DR: Dermal and Respiratory Absorption, IN: Interview, QU: Questionnaire, HR: Hygiene Records UM: Urinary metabolites,

\*Articles including depressive symptoms for outcome assessments

\*\*Cases were defined as female spouses of private applicators who responded 'yes' to the question 'Has a DOCTOR ever told you that you had been diagnosed with depression requiring medication? Controls were female spouses who responded 'no'. (10)

## Exposure assessment

Exposure assessment in the included studies was divided, for the most part, into five patterns: indirect assessment using, for example, an interview or questionnaire; direct assessment including the measurement of urinary metabolites and acetylcholinesterase (AChE) levels in the blood or measurement of ambient OPs using a patch and a pump; a combination of direct and indirect methods; and a combination of biomarkers and ambient OP levels. Seven out of the 23 studies used indirect methods, and six studies used blood AChE inhibition levels to measure AChE levels in the blood as an exposure indicator. Six studies used a combination of indirect methods and biomarkers, and three studies used biomarkers and the ambient OP levels. The remaining study did not mention any exposure assessment method. In all the studies which used urinary metabolites as exposure assessment, results were presented as the sum of dialkylphosphates (DAP) (i.e. the sum of six DAP metabolites: DMP (dimethylphosphate), DMTP (dimethylthiophosphate), DMDTP (dimethyldithiophosphate), DEP (diethylphosphate), DETP (diethylthiophosphate), and DEDTP (diethyldithiophosphate)) (8).

## Outcome measurements



1  
2  
3  
4  
5  
6 Two different outcome measurements were used in the studies; one measured  
7  
8 neurological impairment and the other assessed depressive symptoms. Of the 23 studies,  
9  
10 18 used cognitive function tests to investigate negative neurologic influences caused by  
11  
12 OP exposure.  
13  
14  
15  
16  
17  
18  
19

#### 20 Associations between outcome and exposure

21  
22  
23 Ten of the 18 studies investigating cognitive impairment mentioned that at least one  
24  
25 measure outcome showed more impairment in the exposed groups; however, these  
26  
27 observations were not significant ( $P < 0.05$ ). Six of the studies reported some significant  
28  
29 positive associations of exposure with poor outcome ( $P < 0.05$ ); however, even in these  
30  
31 cases, the significant decrements were observed only in some of neurologic tests,  
32  
33 mainly in the Digit Span and Santa Ana Dexterity tests. Indeed, there are several  
34  
35 versions of these neurologic tests and the significance of the scores often depended on  
36  
37 versions of the tests that were used. Five studies used the Neurobehavioral Evaluation  
38  
39 System (NES), four studies used the Wechsler Adult Intelligence Scale (WAIS), two  
40  
41 studies used the World Health Organization Neurobehavioral Core Test Battery (NCTB),  
42  
43 and the remaining four studies used their own scales.  
44  
45  
46  
47  
48  
49  
50  
51  
52  
53  
54  
55  
56  
57  
58  
59  
60

Five studies adopted depressive symptoms as outcome measurements as shown in the Table2, however, symptoms used in the studies were not standardized.

Table 2 The Summary table of depressive symptoms

| Reference                      | Obtained Results                                                                                                                                                                                                                                | Impact of outcomes |
|--------------------------------|-------------------------------------------------------------------------------------------------------------------------------------------------------------------------------------------------------------------------------------------------|--------------------|
| Beseler et al<br>2006(10)      | Depression due to doctor's diagnosis was not significantly related to low (OR 1.09; 95%CI 0.91, 1.31) or high (OR 1.09; 95%CI 0.91, 1.31) cumulative exposure.                                                                                  | -                  |
| Levin et al<br>1976(26)        | Anxiety score of the pesticide applicators was significantly higher (P<0.05) than that of the farmers. However, there was no significant difference in measures of depression.                                                                  | ++                 |
| London et al<br>1998(15)       | Dizziness, sleepiness, and headache had a significantly higher overall neurological symptom score (P<0.05).                                                                                                                                     | ++                 |
| Misra et al<br>1985(28)        | Common symptoms were Headache(59%), giddiness(50%), ocular symptoms(27%), and paresthesia(18%) and no neurologic change was seen.                                                                                                               | -                  |
| Ohayo-Mitoko et al<br>2000(29) | A significant change in symptom prevalence was found for respiratory (2.48% CI(0.78, 5.38) and central nervous system (2.56% CI(0.99, 6.62), but in terms of skin, systematic, and eye symptoms, there was no statistically significant change. | ++                 |

OR=Odds Ratio ++: Statistically significant (p<0.05), -: Not statistically significant

### Statistical analysis

Sixteen studies used logistic regression, and the remaining seven used other statistical tests including X2-test and t-test. Only one study adjusted for sex in the logistic regression. Thirteen out of the 23 studies adjusted for age, and 11 adjusted for education in the logistic regression. However, only five studies adjusted for alcohol consumption

1  
2  
3  
4  
5  
6 before carrying out the analysis. Further, only two studies adjusted for first language.  
7  
8  
9

### 10 11 **Methodological quality appraisal** 12

13  
14 Four out of the 23 studies were of very good quality, 10 were of good quality, and the  
15  
16 remaining nine were either satisfactory or unsatisfactory. Most of the bad quality studies  
17  
18 either were carried out before 1990 or were performed in some of the less developed  
19  
20 countries. In particular, the methods of recruitment of subjects, controlling for  
21  
22 confounders, and outcome assessment were not appropriate. For example, in some of  
23  
24 the studies all of the participants were volunteers (24, 30) and in another study, the  
25  
26 subjects were not representative of the community from which they were recruited  
27  
28 (factory workers) (31). In addition, how the outcome was assessed was not described in  
29  
30 the unsatisfactory studies, and some of the methods needed to avoid confounders such  
31  
32 as stratification and regression were not used. On the other hand, none of the cohort  
33  
34 studies were assessed as very good quality because most of them did not have a long  
35  
36 enough follow up duration (in five studies, the duration was less than six months) and  
37  
38 the selected subjects were not fully representative of the target community. Moreover,  
39  
40  
41  
42  
43  
44  
45  
46  
47  
48  
49  
50  
51  
52  
53  
54  
55  
56  
57  
58  
59  
60 the methods of outcome assessment were not described in most of the cohort studies.

### Data synthesis and meta-analysis

As shown in Figure 1 and 2, a meta-analysis was carried out using the reported mean scores for the implemented neurobehavioral test; however, because the investigators used different scoring systems, meta-analysis was difficult. The commonly used tests in NCTB, NES, and WAIS were Symbol-Digit and Digit Span Forward and Backward. However, some studies that adopted NES and WAIS to measure neurologic impairment (Table 3) implemented only a few subsets in the trials. Among five studies using a Symbol-Digit test, three used NES and WAIS, two used WAIS-R and unknown tests, and one was a Polish NCTB. For the Digit Span test, two studies used NES and WAIS in the forward tests and two WAIS in the backward tests. Because there were only two studies in each Digit Span test, a meta-analysis would not be very useful, and so a meta-analysis for the Digit Span tests was not carried out and only a meta-analysis for NES and WAIS Symbol-Digit tests was performed. In terms of Symbol Digit (NES), slight positive association can be seen (Figure 1), while Figure 2 showed that there was no difference in mean score of Symbol Digit WAIS between the exposed and control groups. Although the three studies apparently used the same scoring systems, one of the scores was completely different from the other two studies. For example, the scores in the study of Stephens et al. were 24.22 and 21.01 in the exposed and the control groups,

respectively (17), whereas the scores of Daniell and Stephens were much lower: between 2.23 and 3.55 (16, 17, 20). Similarly, the mean scores reported by Bazylewicz-Walczak et al. were higher, 45.50 and 49.40, while the mean scores reported in the other studies were smaller, 2.28 and 2.23 in the WAIS(27).

Table 3 The summary table of neurologic battery tests

| Reference                         | Types of neurologic tests       | Symbol Digit | Digit Span        | Santa Ana | Simple Reaction Time | Syntactic Reasoning(s) |
|-----------------------------------|---------------------------------|--------------|-------------------|-----------|----------------------|------------------------|
| Bazylewicz-Walczak et al 1999(23) | Polish NCTB/WAIS (Symbol Degit) | nd           | nd                | nd        | +                    | nd                     |
| Cole et al 1997(33)               | NCTB                            | nm           | nm                | nm        | nd                   | nd                     |
| Daniell et al 1992(20)            | NES                             | -            | nd                | nd        | nd                   | nd                     |
| Farahat et al 2003(24)            | Unknown                         | ++           | ++(f)*<br>++(b)** | nd        | nd                   | nd                     |
| Fiedler et al 1997(34)            | WAIS-R                          | -            | -                 | nd        | ++                   | nd                     |
| London et al 1997(18)             | WAIS-R                          | nm           | nm                | ++        | nm                   | nd                     |
| Maizish et al 1987(27)            | WAIS                            | 1/++         | nd                | nd        | nd                   | nd                     |
| Roldan-Tapia et al 2005(14)       | WAIS                            | ++ †         | ++ †              | nd        | nd                   | nd                     |
| Ross et al 2010(21)               | WAIS                            | nd           | ++                | nd        | nd                   | nd                     |
| Srivastava et al 2000(31)         | Unknown                         | ++           | ++                | nd        | nd                   | nd                     |
| Steenland et al 2000(11)          | NES                             | -            | -                 | nd        | -                    | nd                     |
| Stephens et al 1995(12)           | Unknown                         | ++           | -                 | nd        | ++                   | +                      |
| Stephens et al 1996(17)           | NES/ACT                         | nm           | nm                | nd        | nm                   | nm                     |
| Stephens et al 2004(16)           | NES/ACT                         | -            | -                 | nd        | -                    | ++<br>(ACTS)           |

++:  $P < 0.05$ , +:  $0.05 \leq P < 0.1$ , -:  $P > 0.1$ ,

The Exposed groups were slower or had poor outcomes than control groups

1  
2  
3  
4  
5 † : The article did not mention whether obtained results were positive or negative  
6  
7 nd: The subsets of neurological tests were not performed  
8  
9 nm: Although the subsets of neurological tests were performed, P-values were not  
10 mentioned in the article.  
11 \*(f) Digit Span forward, \*\*(b) Digit Span backward  
12  
13

## 14 15 16 **DISCUSSION**

17  
18 The results showed that there were 23 epidemiological studies which examine the  
19  
20 relationship between OPs and CNS by systematically searching. When comparing the  
21  
22 selected studies by each item, two main findings were obtained; one is exposure  
23  
24 assessment and the other is outcome measurement. With respect to exposure assessment,  
25  
26 the matter of measurement was categorized into three: direct, indirect and a combination  
27  
28 of both methods. On the other hand, in terms of outcome measurements, there seemed  
29  
30 to be two main ways to gauge neurologic impairment.  
31  
32  
33  
34  
35  
36  
37  
38  
39  
40  
41

### 42 **Exposure assessment**

43  
44 Exposure assessment was not used for group allocation in all the studies, and was  
45  
46 implemented to measure how much subjects were exposed and the outcomes of the  
47  
48 neurobehavioral tests. Each study used different exposure assessment which made it  
49  
50 difficult to accurately compare the studies. In addition, there seemed to be  
51  
52 methodological imperfection in both the direct and indirect methods. To illustrate,  
53  
54  
55  
56  
57  
58  
59  
60

1  
2  
3  
4  
5  
6 interviews and questionnaires were used in the indirect method, though, one study  
7  
8  
9 recruited subjects over 60 years old who had been 11 years since their retirement (21).

10  
11 In this study, recall bias could be a problem because the rate of cognitive impairment is  
12  
13 likely to have increased as the subjects put on years. This could lead to inaccuracy of  
14  
15 exposure assessment. With respect to the direct method, there were several ways to  
16  
17 detect OPs. Although some studies used urinary metabolites as an indicator of exposure,  
18  
19 DPA is metabolized rapidly and excreted from bodies (7). Therefore, measuring urinary  
20  
21 analysis was not a perfect way to assess OPs exposure, on the contrary, it seemed that  
22  
23 measuring AChE levels was the most reliable way to assess the amount of OP exposure,  
24  
25 because the cholinesterase level becomes normal by being synthesized into a new  
26  
27 molecular of AChE, which takes around a week (35). Hence, the amount of OP  
28  
29 exposure within one week can be accurately measured by AChE inhibition level in  
30  
31 blood, but this cannot be assessed the amount of OPs exposure accumulated in body  
32  
33 tissues for a long time. Thus, direct method using the levels of AChE in blood is  
34  
35 appropriate for assessing short-term exposure, however, it is not for long-term exposure.  
36  
37  
38  
39  
40  
41  
42  
43  
44  
45  
46  
47  
48

49 On the contrary, indirect methods such as structured interview and questionnaire could  
50  
51 be helpful to grasp the past information about OPs use, even though there may be some  
52  
53 recall bias. In order to minimize measurement error, it is desired that a combination of  
54  
55  
56  
57  
58  
59  
60

1  
2  
3  
4  
5  
6 direct and indirect methods should be used.  
7  
8  
9

### 10 11 **Outcome assessment** 12

13  
14 As with exposure assessment, a similar problem can be seen in outcome assessment,  
15 for example, five out of the 23 studies adopted depressive symptoms as outcome  
16 measurements (Table 2). On the other hand, the remaining 18 studies used neurologic  
17 battery tests such as NES and WAIS. Thus the main problem in the outcome  
18 measurements is that comparison between the studies could not be done easily, because  
19 neurologic battery tests differed by each study. To elaborate, as shown in Table 3, three  
20 studies adopted WAIS and four used NES as outcome assessment, and since there were  
21 various versions of neurologic battery tests including WAIS and WAIS-R, the content of  
22 the tests slightly differ from each study. Furthermore, although some studies mentioned  
23 about the relationship between OP exposure and confounding factors such as age and  
24 education, they did not perform statistical tests between the exposed and control groups.  
25 These things obviously make it difficult to compare the outcomes of neurologic  
26 impairment among the studies. In addition, even in the same neurologic battery test,  
27 there are a variety of subtests such as Symbol Digit and Digit Span to measure  
28 neurologic impairment. The studies selected some subtests in their trials, hence there  
29  
30  
31  
32  
33  
34  
35  
36  
37  
38  
39  
40  
41  
42  
43  
44  
45  
46  
47  
48  
49  
50  
51  
52  
53  
54  
55  
56  
57  
58  
59  
60



1  
2  
3  
4  
5  
6 were few studies left to precisely compare. As a consequence, although the  
7  
8  
9 meta-analysis was carried out using the results of Symbol Digit, it was not enough to  
10  
11  
12 determine whether or not there was a statistically significant relationship. Similarly, in  
13  
14 terms of depressive symptoms, outcomes were different from each study, for instance,  
15  
16 one study had the proportion of headache, while the other used that of dizziness and  
17  
18 sleepiness as main outcomes. Thus, neurologic battery tests, at least, should be  
19  
20  
21 standardized for further epidemiological research. If not, it could be difficult to gain  
22  
23  
24 precise conclusion that cumulative OP exposure can negatively affect human CNS or  
25  
26  
27 not.  
28  
29  
30  
31  
32  
33  
34

### 35 **Study design**

36  
37 Sixteen of the studies were cross-sectional studies and six were cohort studies.  
38  
39 Longitudinal studies are more desirable rather than cross-sectional studies for three  
40  
41 main reasons: one, in cross-sectional studies, it is difficult to confirm whether or not the  
42  
43 disease preceded the exposure; two, the outcome conditions in cross-sectional studies  
44  
45 are too short-lasting (36); and three, cross-sectional studies are suitable for investigating  
46  
47 at a certain point, but they are not appropriate for mid-term studies. Especially,  
48  
49 agricultural work using pesticides is easily influenced by seasonality, and one research  
50  
51  
52  
53  
54  
55  
56  
57  
58  
59  
60

1  
2  
3  
4  
5  
6 regarding reproductive health by OPs exposure stated that sperm concentration and  
7  
8  
9 counts are negatively affected on peak season, spring, rather than winter (6). The results  
10  
11  
12 of the neurobehavioral tests may also be affected by seasonality; therefore, cohort  
13  
14  
15 studies are ideal to assess the influence of occupational OPs exposure than  
16  
17  
18 cross-sectional.  
19

### 20 21 22 23 **Possible bias**

24  
25  
26 If foreign workers are included in the trials, their first language should be considered  
27  
28  
29 as possible bias. Because there is possibility that the non-native subjects cannot fully  
30  
31  
32 understand the content and instruction of the tests, which could lead to lower score than  
33  
34  
35 that of native speakers. Nowadays, USA and gulf countries have accepted foreign  
36  
37  
38 workers from India and South American countries as important work force (20, 37, 38).  
39  
40  
41 However, in this systematic review, there were only two studies to mention about first  
42  
43  
44 language in the inclusion and exclusion criteria (17, 20). Since first language could  
45  
46  
47 influence the outcomes, it should be one of the factors to be considered when selecting  
48  
49  
50 subjects. Furthermore, when migrants and foreign labourers are included in the studies,  
51  
52  
53 education system is a point that we have to pay attention. Because education system  
54  
55  
56 between developed and less developed countries could be largely different. Hence, it is  
57  
58  
59  
60

1  
2  
3  
4  
5  
6 necessary to be careful when the results between subjects who come from different  
7  
8  
9 countries are compared. Additionally, occupations could be a factor of selection bias,  
10  
11  
12 because police officer and construction workers have a possibility of experiencing the  
13  
14  
15 loss of consciousness due to accidents of their jobs (21).  
16  
17  
18  
19

### 20 21 **Possible confounders**

22  
23 Age and social cultural factors are known as common confounding factors, though, not  
24  
25  
26 all studies adjusted them in the analysis. These factors could easily influence the results;  
27  
28  
29 hence they should be adjusted for further trials. Moreover, since head injury and alcohol  
30  
31  
32 consumption have a probability of negatively affecting neurologic battery tests, they  
33  
34  
35 should be treated as potential confounders as well. However, the results showed that  
36  
37  
38 there was no study to adjust head injury in the logistic regression, on the other hand,  
39  
40  
41 there were some studies to adjust alcohol consumption in the analysis (10, 15, 18, 20,  
42  
43  
44 27). Apart from these factors, participants' nutrition status including vitamin deficiency  
45  
46  
47 is also relevant to the outcome of neuropsychological tests (15, 18). Thus, all factors  
48  
49  
50 that can affect measurements of cognitive function should be adjusted in the analysis.  
51  
52  
53  
54

### 55 56 **Limitations**

1  
2  
3  
4  
5  
6 Although all of the studies which were collected in this systematic review were  
7  
8 relevant to occupational OP exposure, some of them included other pesticides such as  
9  
10 carbamates, fungicides, and herbicides. Pesticides usually are mixed with another type  
11  
12 of pesticides to make their effects stronger, and this is the common in agriculture. In this  
13  
14 systematic review, four out of 23 studies were not single OPs exposure and they used a  
15  
16 combination of OPs, OCs carbamates and fungicide. Therefore, it may be quite difficult  
17  
18 to measure the effect of only occupational OP exposure.  
19  
20  
21  
22  
23  
24

25  
26 Of these studies, 18 assessed neurological or neuropsychological impairment using IQ  
27  
28 tests. However, since the authors used the different battery tests such as NCTB, NES,  
29  
30 and WAIS, there were only a few common tests including Digit Span and Symbol digit  
31  
32 tests across the studies, which made the comparison of the included studies more  
33  
34 difficult. Hence, a meta-analysis was applied to the two tests, but it is obvious that  
35  
36 studies which can be appraised are limited. In order to completely assess neurological  
37  
38 impairment, it is desirable that the same neurobehavioral test battery be used in a large  
39  
40  
41  
42  
43  
44  
45  
46  
47 number of studies.  
48  
49  
50  
51  
52  
53  
54

## 55 CONCLUSION

56  
57  
58  
59  
60

1  
2  
3  
4  
5  
6 Although the suggestive evidence for neurobehavioral test battery is inconsistent, there  
7  
8 was slight positive relationship of poor outcome implying that occupational exposure to  
9  
10 OPs could be harmful for the CNS of the human. The evidence was weak in particular  
11  
12 because some studies showed that there was a negative relationship of OPs with poor  
13  
14 outcome. In addition, since the test items of the neurobehavioral test battery depended  
15  
16 on the investigators, only a few items were common across the studies. Consequently,  
17  
18 there were only a few studies left for the meta-analysis; indeed, there were a few items  
19  
20 which could be compared. For future studies, the neurobehavioral or  
21  
22 neuropsychological test battery should be standardised in order to ensure adequate  
23  
24 quality and to make more possible pooling evidence from the studies.  
25  
26  
27  
28  
29  
30  
31  
32  
33  
34  
35  
36  
37

## 38 **ACKNOWLEDGMENTS**

39  
40 We wish to express our appreciation to Professor Ben Armstrong for his insightful  
41  
42 comments on our paper.  
43  
44  
45  
46  
47  
48

## 49 **FOOTNOTES**

50  
51  
52 **Contributors** NT conceived study design and participated in protocol development,  
53  
54 literature searching, data extraction, data analysis and drafted the manuscript. MH  
55  
56  
57  
58  
59  
60

critically reviewed the draft and contributed to the manuscript revisions.

**Funding** This research received no specific grant from any funding agency in the public.

**Competing interests** None.

**Ethical approval** Systematic review.

**Provenance and peer review** Not commissioned, externally peer reviewed.

**Data sharing statement** No additional data are available.

## REFERENCES

1. Centre WHOM. Pesticides are a leading suicide method. 2006.
2. Steenland K, Jenkins B, Ames RG, et al. Chronic neurological sequelae to organophosphate pesticide poisoning. American journal of public health. 1994;84(5):731-6. Epub 1994/05/01.
3. Moretto A, Lotti M. Poisoning by organophosphorus insecticides and sensory neuropathy. Journal of neurology, neurosurgery, and psychiatry. 1998;64(4):463-8. Epub 1998/05/12.
4. Rohlman DS, Arcury TA, Quandt SA, et al. Neurobehavioral performance in preschool children from agricultural and non-agricultural communities in Oregon and

1  
2  
3  
4  
5  
6 North Carolina. *Neurotoxicology*. 2005;26(4):589-98. Epub 2005/08/23.  
7

8  
9 5. Rastogi SK, Tripathi S, Ravishanker D. A study of neurologic symptoms on  
10 exposure to organophosphate pesticides in the children of agricultural workers. *Indian*  
11 *journal of occupational and environmental medicine*. 2010;14(2):54-7. Epub  
12 2010/12/02.  
13  
14  
15  
16  
17  
18

19  
20 6. Recio-Vega R, Ocampo-Gomez G, Borja-Aburto VH, et al. Organophosphorus  
21 pesticide exposure decreases sperm quality: association between sperm parameters and  
22 urinary pesticide levels. *Journal of applied toxicology : JAT*. 2008;28(5):674-80. Epub  
23 2007/11/30.  
24  
25  
26  
27  
28  
29

30  
31 7. Yucra S, Gasco M, Rubio J, et al. Semen quality in Peruvian pesticide  
32 applicators: association between urinary organophosphate metabolites and semen  
33 parameters. *Environ Health-Glob*. 2008;7:-.  
34  
35  
36  
37  
38  
39

40 8. Yucra S, Rubio J, Gasco M, et al. Semen quality and reproductive sex hormone  
41 levels in Peruvian pesticide sprayers. *International journal of occupational and*  
42 *environmental health*. 2006;12(4):355-61.  
43  
44  
45  
46  
47  
48

49 9. Albers JW, Berent S, Garabrant DH, et al. The effects of occupational exposure  
50 to chlorpyrifos on the neurologic examination of central nervous system function: a  
51 prospective cohort study. *Journal of occupational and environmental medicine /*  
52  
53  
54  
55  
56  
57

1  
2  
3  
4  
5  
6 American College of Occupational and Environmental Medicine. 2004;46(4):367-78.

7  
8  
9 Epub 2004/04/13.

10  
11 10. Beseler C, Stallones L, Hoppin JA, et al. Depression and pesticide exposures in  
12 female spouses of licensed pesticide applicators in the agricultural health study cohort.

13  
14  
15 Journal of occupational and environmental medicine / American College of  
16 Occupational and Environmental Medicine. 2006;48(10):1005-13. Epub 2006/10/13.

17  
18  
19  
20  
21 11. Steenland K, Dick RB, Howell RJ, et al. Neurologic function among  
22 termiticide applicators exposed to chlorpyrifos. Environmental health perspectives.  
23  
24  
25  
26  
27  
28  
29  
30  
31 2000;108(4):293-300. Epub 2000/04/07.

32  
33 12. Stephens R, Spurgeon A, Calvert IA, et al. Neuropsychological effects of  
34 long-term exposure to organophosphates in sheep dip. Lancet. 1995;345(8958):1135-9.

35  
36  
37  
38 Epub 1995/05/06.

39  
40  
41 13. Dassanayake T, Gawarammana IB, Weerasinghe V, et al. Auditory  
42 event-related potential changes in chronic occupational exposure to organophosphate  
43 pesticides. Clinical neurophysiology : official journal of the International Federation of  
44  
45  
46  
47  
48  
49  
50  
51  
52  
53  
54  
55  
56  
57  
58  
59  
60  
Clinical Neurophysiology. 2009;120(9):1693-8. Epub 2009/08/18.

14. Roldan-Tapia L, Parron T, Sanchez-Santed F. Neuropsychological effects of  
long-term exposure to organophosphate pesticides. Neurotoxicology and teratology.



1  
2  
3  
4  
5  
6 2005;27(2):259-66. Epub 2005/03/01.  
7

8  
9 15. London L, Nell V, Thompson ML, et al. Effects of long-term organophosphate  
10 exposures on neurological symptoms, vibration sense and tremor among South African  
11 farm workers. *Scandinavian journal of work, environment & health*. 1998;24(1):18-29.  
12  
13 Epub 1998/04/30.  
14  
15  
16  
17

18  
19  
20 16. Stephens R, Sreenivasan B. Neuropsychological effects of long-term low-level  
21 organophosphate exposure in orchard sprayers in England. *Archives of environmental*  
22  
23  
24  
25  
26  
27  
28 health. 2004;59(11):566-74. Epub 2006/04/08.

29  
30 17. Stephens R, Spurgeon A, Berry H. Organophosphates: the relationship between  
31 chronic and acute exposure effects. *Neurotoxicology and teratology*. 1996;18(4):449-53.  
32  
33  
34  
35  
36  
37 Epub 1996/07/01.

38  
39 18. London L, Myers JE, Nell V, et al. An investigation into neurologic and  
40 neurobehavioral effects of long-term agrichemical use among deciduous fruit farm  
41  
42  
43  
44  
45  
46  
47  
48 workers in the Western Cape, South Africa. *Environmental research*.  
1997;73(1-2):132-45. Epub 1997/01/01.

49  
50 19. Cole DC, Carpio F, Julian J, et al. Neurobehavioral outcomes among farm and  
51  
52  
53  
54 nonfarm rural Ecuadorians. *Neurotoxicology and teratology*. 1997;19(4):277-86.

55  
56 20. Daniell W, Barnhart S, Demers P, et al. Neuropsychological performance  
57  
58  
59  
60

1  
2  
3  
4  
5  
6 among agricultural pesticide applicators. *Environmental research*. 1992;59(1):217-28.

7  
8  
9 Epub 1992/10/01.

10  
11 21. Mackenzie Ross SJ, Brewin CR, Curran HV, et al. Neuropsychological and  
12 psychiatric functioning in sheep farmers exposed to low levels of organophosphate  
13 pesticides. *Neurotoxicology and teratology*. 2010;32(4):452-9. Epub 2010/03/17.

14  
15  
16  
17  
18  
19  
20 22. Fiedler N, Kipen H, KellyMcNeil K, et al. Long-term use of organophosphates  
21 and neuropsychological performance. *American journal of industrial medicine*.  
22  
23  
24  
25  
26  
27 1997;32(5):487-96.

28  
29  
30 23. Bazylewicz-Walczak B, Majczakowa W, Szymczak M. Behavioral effects of  
31 occupational exposure to organophosphorous pesticides in female greenhouse planting  
32 workers. *Neurotoxicology*. 1999;20(5):819-26. Epub 1999/12/11.

33  
34  
35  
36  
37  
38 24. Farahat TM, Abdelrasoul GM, Amr MM, et al. Neurobehavioural effects  
39 among workers occupationally exposed to organophosphorous pesticides. *Occupational*  
40  
41  
42  
43  
44  
45  
46  
47  
48  
49  
50  
51  
52  
53  
54  
55  
56  
57  
58  
59  
60  
and environmental medicine. 2003;60(4):279-86. Epub 2003/03/28.

25. Korsak RJ, Sato MM. Effects of chronic organophosphate pesticide exposure  
on the central nervous system. *Clinical toxicology*. 1977;11(1):83-95. Epub 1977/01/01.

26. Levin HS, Rodnitzky RL, Mick DL. Anxiety associated with exposure to  
organophosphate compounds. *Archives of general psychiatry*. 1976;33(2):225-8. Epub

1  
2  
3  
4  
5  
6 1976/02/01.  
7

8  
9 27. Maizlish N, Schenker M, Weisskopf C, et al. S. A behavioral evaluation of pest  
10 control workers with short-term, low-level exposure to the organophosphate diazinon.  
11 American journal of industrial medicine. 1987;12(2):153-72. Epub 1987/01/01.  
12  
13  
14

15  
16  
17 28. Misra UK, Nag D, Bhushan V, et al. Clinical and biochemical changes in  
18 chronically exposed organophosphate workers. Toxicology letters. 1985;24(2-3):187-93.  
19  
20  
21  
22  
23  
24 Epub 1985/02/01.

25  
26  
27 29. Ohayo-Mitoko GJ, Kromhout H, Simwa JM, et al. Self reported symptoms and  
28 inhibition of acetylcholinesterase activity among Kenyan agricultural workers.  
29 Occupational and environmental medicine. 2000;57(3):195-200. Epub 2000/05/16.  
30  
31  
32  
33

34  
35 30. Rodnitzky RL. Occupational exposure to organophosphate pesticides: a  
36 neurobehavioral study. Archives of environmental health. 1975;30(2):98-103. Epub  
37  
38  
39  
40  
41 1975/02/01.  
42

43  
44 31. Srivastava AK, Gupta BN, Bihari V, et al. Clinical, biochemical and  
45 neurobehavioural studies of workers engaged in the manufacture of quinalphos. Food  
46 and chemical toxicology : an international journal published for the British Industrial  
47  
48  
49  
50  
51  
52  
53  
54 Biological Research Association. 2000;38(1):65-9. Epub 2000/02/24.

55  
56 32. GA Wells BS, D O'Connell, J Peterson, et al. The Newcastle-Ottawa Scale  
57  
58  
59  
60

1  
2  
3  
4  
5  
6 (NOS) for assessing the quality of nonrandomised studies in meta-analyses. 2010.  
7  
8

9 33. Cole DC, Carpio F, Julian J, et al. Neurobehavioral outcomes among farm and  
10 nonfarm rural Ecuadorians. *Neurotoxicology and teratology*. 1997;19(4):277-86. Epub  
11 1997/07/01.  
12  
13  
14

15  
16  
17 34. Fiedler N, Kipen H, Kelly-McNeil K, et al. Long-term use of organophosphates  
18 and neuropsychological performance. *American journal of industrial medicine*.  
19 1997;32(5):487-96. Epub 1997/11/05.  
20  
21  
22

23  
24  
25 35. Ngowi AV, Maeda DN, Partanen TJ, et al. Acute health effects of  
26 organophosphorus pesticides on Tanzanian small-scale coffee growers. *J Expo Anal*  
27 *Environ Epidemiol*. 2001;11(4):335-9. Epub 2001/09/26.  
28  
29  
30

31  
32 36. Armstrong B. Comment for the final draft. 2010.  
33  
34

35  
36  
37 37. Gomes J, Lloyd O, Revitt MD, et al. Morbidity among farm workers in a desert  
38 country in relation to long-term exposure to pesticides. *Scand J Work Env Hea*.  
39 1998;24(3):213-9.  
40  
41  
42

43  
44  
45 38. Griffin J, Soskolne V. Psychological distress among Thai migrant workers in  
46 Israel. *Soc Sci Med*. 2003;57(5):769-74.  
47  
48  
49  
50  
51  
52  
53  
54  
55  
56  
57  
58  
59  
60

1  
2  
3  
4  
5  
6  
7  
8  
9  
10  
11  
12  
13  
14  
15  
16  
17  
18  
19  
20  
21  
22  
23  
24  
25  
26  
27  
28  
29  
30  
31  
32  
33  
34  
35  
36  
37  
38  
39  
40  
41  
42  
43  
44  
45  
46  
47  
48  
49  
50  
51  
52  
53  
54  
55  
56  
57  
58  
59  
60

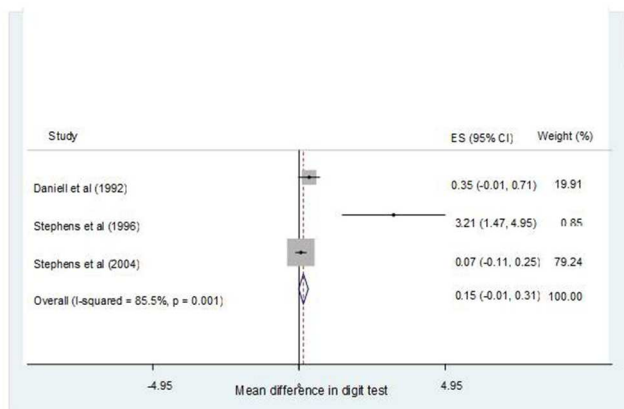

Figure1 shows the result of meta-analysis using NES  
254x190mm (96 x 96 DPI)

Review only

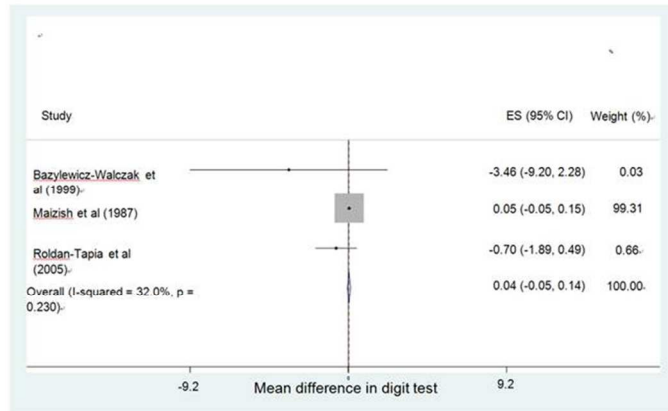

Figure2 shows the result of meta-analysis using WAIS.  
254x190mm (96 x 96 DPI)

Appendix A

The flow of study inclusion and exclusion diagram

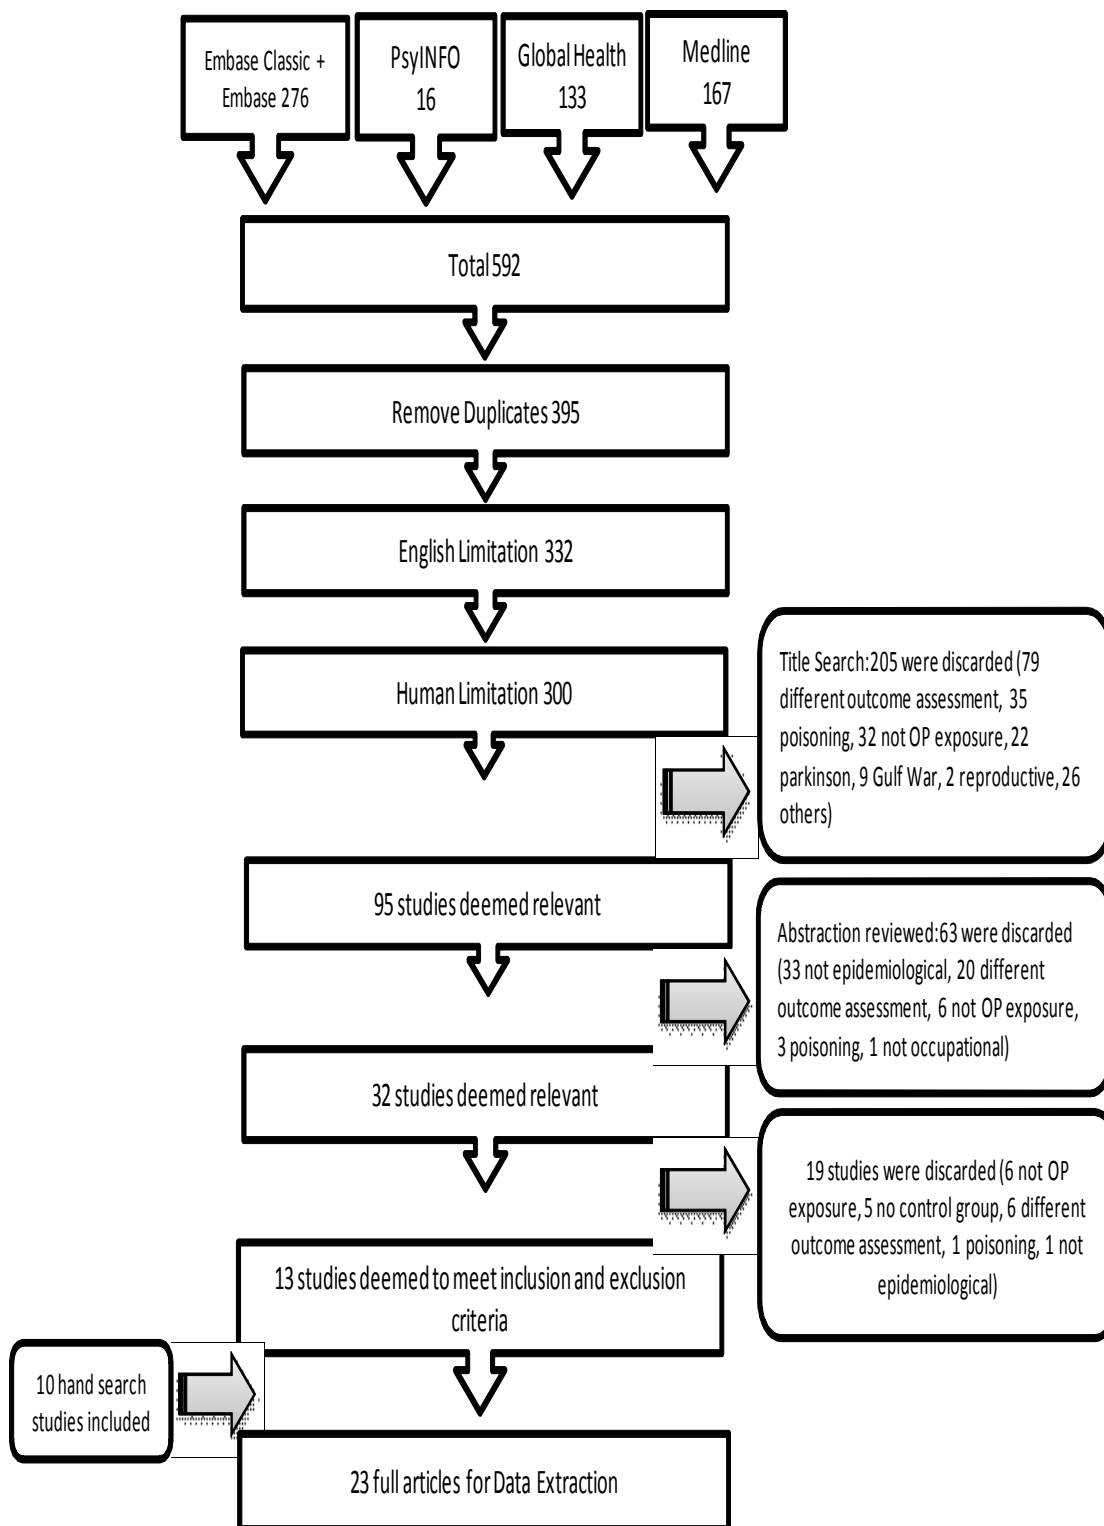

**Appendix B****The Appraisal Standard of Newcastle/Ottawa Scale****Selection**

- 1) Representativeness of the exposed group/cohort
  - a) Truly representative of the average farmers or pesticides applicators in the community\*
  - b) Somewhat representative of the average farmers or pesticides applicators in the community\*
  - c) Selected group of users (e.g. factory workers, volunteers)
  - d) No description of the derivation of the group
- 2) Selection of the non-exposed group/cohort
  - a) Drawn from the same community as the exposed group\*
  - b) Drawn from a different source
  - c) No description of the derivation of the non-exposed group
- 3) Ascertainment of exposure
  - a) Secure record (e.g. biomarkers)\*
  - b) Structured interview or questionnaire\*
  - c) Written self reports
  - d) No description
- 4) Demonstration that outcome of interest was not present at start of study (*Cohort Studies Only*)
  - a) Yes\*
  - b) No

**Confounder**

- 1) Comparability of groups on the basis of the design or analysis
  - a) Study controls for age and education\*
  - b) Study controls for any additional factor\* (e.g. alcohol consumption, smoking, and first language)

**Outcome**

- 1) Assessment of outcome
  - a) Independent blind assessment\*
  - b) Record linkage\*
  - c) Self reports



- 1  
2  
3 d) No description  
4  
5  
6 2) Was follow-up long enough for outcomes to occur (*Cohort Studies Only*)  
7 a) Yes (select an adequate follow up period for outcome of interest)\*  
8 b) No  
9  
10  
11 3) Adequacy of follow up of cohorts (*Cohort Studies Only*)  
12 a) Complete follow up – all subjects accounted for\*  
13 b) Subjects lost to follow up unlikely to introduce bias – small number lost - > 70% follow  
14 up, or description provided of those lost\*  
15 c) Follow up < 70% and no description of those lost  
16 d) No statement  
17  
18  
19  
20  
21  
22

23 *Case Control Studies:*

24 **Selection**

- 25  
26 1) Is the case definition adequate?  
27 a) Yes, with independent validation\*  
28 b) Yes, e.g. record linkage on self reports  
29 c) No description  
30  
31  
32  
33  
34 2) Representativeness of the cases  
35 a) Consecutive or obviously representative series of cases\*  
36 b) Potential for selection biases or non stated  
37  
38  
39  
40 3) Selection of Controls  
41 a) Community controls\*  
42 b) Hospital controls  
43 c) No description  
44  
45  
46  
47 4) Definition of Controls  
48 a) No history of disease (endpoint)\*  
49 b) No description of source  
50  
51  
52

53 **Confounder**

- 54  
55 1) Comparability of cases and controls on the basis of design or analysis  
56 a) Study controls for age and education\*  
57 b) Study controls for any additional factor\*  
58  
59  
60

**Exposure**

- 1) Ascertainment of exposure
    - a) Secure record (e.g. biomarkers)\*
    - b) Structured interview where blind to case/control status\*
    - c) Interview not blinded to case/ control status
    - d) Written self reports or medical record only
    - e) No description
  - 2) Same method of ascertainment for cases and controls
    - a) Yes\*
    - b) No
  - 3) Non-Response rate
    - a) Same rate for both groups\*
    - b) Non respondents described
    - c) Rate different and no designation
- \*: plus one point

There are five items in cross-sectional studies and eight items in cohort and case control studies, respectively. The quality of the studies was defined as follows.

*Cross-sectional Studies:*

Very Good Studies: 5 points

Good Studies: 4 points

Satisfactory Studies: 3 points

Unsatisfactory Studies: 0 to 2 points

*Cohort / Case control Studies:*

Very Good Studies: 7 to 8 points

Good Studies: 5 to 6 points

Satisfactory: 4 points

Unsatisfactory Studies: 0 to 3 points

## Appendix C

Table 1 Quality Appraisal (Cross-sectional Studies)

|                                                                                           | Cole et al<br>1997 | Dassanaya<br>ke et al<br>2009 | Farahat et<br>al 2003 | Fiedler<br>et al<br>1997 | Korsak et al<br>1977 | Levin et al<br>1976 |
|-------------------------------------------------------------------------------------------|--------------------|-------------------------------|-----------------------|--------------------------|----------------------|---------------------|
| <b>Selection</b>                                                                          |                    |                               |                       |                          |                      |                     |
| 1) Representativeness of the exposed group                                                |                    |                               |                       |                          |                      |                     |
| a) Truly representative of the average farmers or pesticides applicators in the community |                    |                               |                       |                          |                      |                     |
| b) Somewhat representative of the average or pesticides applicators in the community      | a) (+1)            | b) (+1)                       | c) (0)                | a) (+1)                  | b) (+1)              | b) (+1)             |
| c) Selected group of users                                                                |                    |                               |                       |                          |                      |                     |
| d) No description of the derivation of the group                                          |                    |                               |                       |                          |                      |                     |
| 2) Selection of the non exposed group                                                     |                    |                               |                       |                          |                      |                     |
| a) Drawn from the same community as the exposed group                                     | a) (+1)            | b) (0)                        | b) (0)                | a) (+1)                  | a) (+1)              | b) (0)              |
| b) Drawn from a different source                                                          |                    |                               |                       |                          |                      |                     |
| c) No description of the derivation of the non exposed group                              |                    |                               |                       |                          |                      |                     |
| 3) Ascertainment of exposure                                                              |                    |                               |                       |                          |                      |                     |
| a) Secured record (e.g. biomarkers)                                                       |                    |                               |                       |                          |                      |                     |
| b) Structured interview or questionnaire                                                  | b) (+1)            | d) (0)                        | a) (+1)               | b) (+1)                  | a) (+1)              | a) (+1)             |
| c) Written self report                                                                    |                    |                               |                       |                          |                      |                     |
| d) No description                                                                         |                    |                               |                       |                          |                      |                     |
| <b>Confounders</b>                                                                        |                    |                               |                       |                          |                      |                     |
| 1) Comparability of groups on the basis of the design or analysis                         | b) (+1)            | - (0)                         | a) (+1)               | - (0)                    | - (0)                | - (0)               |
| a) Study controls for age and                                                             |                    |                               |                       |                          |                      |                     |

|                                                                                                     |               |                    |                    |          |                  |                  |
|-----------------------------------------------------------------------------------------------------|---------------|--------------------|--------------------|----------|------------------|------------------|
| education                                                                                           |               |                    |                    |          |                  |                  |
| b) Study controls for any additional factor (e.g. alcohol consumption, smoking, and first language) |               |                    |                    |          |                  |                  |
| <b>Outcome</b>                                                                                      |               |                    |                    |          |                  |                  |
| 1) Assessment of outcome                                                                            |               |                    |                    |          |                  |                  |
| a) Independent blind assessment                                                                     | a) (+1)       | b) (+1)            | d) (0)             | b) (+1)  | d) (0)           | a) (+1)          |
| b) Record linkage                                                                                   |               |                    |                    |          |                  |                  |
| c) Self report                                                                                      |               |                    |                    |          |                  |                  |
| d) No description                                                                                   |               |                    |                    |          |                  |                  |
| Overall Score                                                                                       | 5/5 Very Good | 2/5 Unsatisfactory | 2/5 Unsatisfactory | 4/5 Good | 3/5 Satisfactory | 3/5 Satisfactory |

Continued...

Table 1 Continued

| Selection                                                                                 | London et al 1997 | London et al 1998 | Maizish et al 1987 | Rodnitzky et al 1975 | Roldan-Tapia et al 2005 |
|-------------------------------------------------------------------------------------------|-------------------|-------------------|--------------------|----------------------|-------------------------|
| 1) Representativeness of the exposed group                                                |                   |                   |                    |                      |                         |
| a) Truly representative of the average farmers or pesticides applicators in the community |                   |                   |                    |                      |                         |
| b) Somewhat representative of the average or pesticides applicators in the community      | b) (+1)           | a) (+1)           | c) (0)             | c) (0)               | a) (+1)                 |
| c) Selected group of users                                                                |                   |                   |                    |                      |                         |
| d) No description of the derivation of the group                                          |                   |                   |                    |                      |                         |
| 2) Selection of the non exposed group                                                     |                   |                   |                    |                      |                         |
| a) Drawn from the same community as the exposed group                                     | a) (+1)           | a) (+1)           | a) (+1)            | c) (0)               | a) (+1)                 |
| b) Drawn from a different source                                                          |                   |                   |                    |                      |                         |
| c) No description of the derivation of the non exposed group                              |                   |                   |                    |                      |                         |

|                                                                                                     |               |          |          |                    |               |
|-----------------------------------------------------------------------------------------------------|---------------|----------|----------|--------------------|---------------|
| 3) Ascertainment of exposure                                                                        |               |          |          |                    |               |
| a) Secured record (e.g. biomarkers)                                                                 |               |          |          |                    |               |
| b) Structured interview or questionnaire                                                            | b) (+1)       | b) (+1)  | a) (+1)  | a) (+1)            | a) (+1)       |
| c) Written self report                                                                              |               |          |          |                    |               |
| d) No description                                                                                   |               |          |          |                    |               |
| <b>Confounder</b>                                                                                   |               |          |          |                    |               |
| 1) Comparability of groups on the basis of the design or analysis                                   |               |          |          |                    |               |
| a) Study controls for age and education                                                             | b) (+1)       | b) (+1)  | b) (+1)  | - (0)              | a) (+1)       |
| b) Study controls for any additional factor (e.g. alcohol consumption, smoking, and first language) |               |          |          |                    |               |
| <b>Outcome</b>                                                                                      |               |          |          |                    |               |
| 1) Assessment of outcome                                                                            |               |          |          |                    |               |
| a) Independent blind assessment                                                                     | b) (+1)       | c) (0)   | a) (+1)  | d) (0)             | a) (+1)       |
| b) Record linkage                                                                                   |               |          |          |                    |               |
| c) Self report                                                                                      |               |          |          |                    |               |
| d) No description                                                                                   |               |          |          |                    |               |
| Overall Score                                                                                       | 5/5 Very Good | 4/5 Good | 4/5 Good | 1/5 Unsatisfactory | 5/5 Very Good |

Continued...

Table 1 Continued

| Selection                                                                                 | Srivastava et al 2000 | Steenland et al 2000 | Stephens et al 1995 | Stephens et al 1996 | Stephens et al 2004 |
|-------------------------------------------------------------------------------------------|-----------------------|----------------------|---------------------|---------------------|---------------------|
| 1) Representativeness of the exposed group                                                |                       |                      |                     |                     |                     |
| a) Truly representative of the average farmers or pesticides applicators in the community |                       |                      |                     |                     |                     |
| b) Somewhat representative of the average or pesticides applicators in the community      | c) (0)                | a) (+1)              | a) (+1)             | a) (+1)             | a) (+1)             |
| c) Selected group of users                                                                |                       |                      |                     |                     |                     |
| d) No description of the derivation of the group                                          |                       |                      |                     |                     |                     |

|                                                                                                     |                       |                  |             |             |             |
|-----------------------------------------------------------------------------------------------------|-----------------------|------------------|-------------|-------------|-------------|
| 2) Selection of the non exposed group                                                               |                       |                  |             |             |             |
| a) Drawn from the same community as the exposed group                                               | a) (+1)               | a) (+1)          | a) (+1)     | a) (+1)     | a) (+1)     |
| b) Drawn from a different source                                                                    |                       |                  |             |             |             |
| c) No description of the derivation of the non exposed group                                        |                       |                  |             |             |             |
| 3) Ascertainment of exposure                                                                        |                       |                  |             |             |             |
| a) Secured record (e.g. biomarkers)                                                                 |                       |                  |             |             |             |
| b) Structured interview or questionnaire                                                            | a) (+1)               | a) (+1)          | c) (0)      | a) (+1)     | b) (+1)     |
| c) Written self report                                                                              |                       |                  |             |             |             |
| d) No description                                                                                   |                       |                  |             |             |             |
| <b>Confounder</b>                                                                                   |                       |                  |             |             |             |
| 1) Comparability of groups on the basis of the design or analysis                                   |                       |                  |             |             |             |
| a) Study controls for age and education                                                             | - (0)                 | b) (+1)          | b) (+1)     | b) (+1)     | - (0)       |
| b) Study controls for any additional factor (e.g. alcohol consumption, smoking, and first language) |                       |                  |             |             |             |
| <b>Outcome</b>                                                                                      |                       |                  |             |             |             |
| 1) Assessment of outcome                                                                            |                       |                  |             |             |             |
| a) Independent blind assessment                                                                     |                       |                  |             |             |             |
| b) Record linkage                                                                                   | d) (0)                | a) (+1)          | b) (+1)     | d) (0)      | b) (+1)     |
| c) Self report                                                                                      |                       |                  |             |             |             |
| d) No description                                                                                   |                       |                  |             |             |             |
| Overall Score                                                                                       | 2/5<br>Unsatisfactory | 5/5 Very<br>Good | 4/5<br>Good | 4/5<br>Good | 4/5<br>Good |

Table 2 Quality Appraisal (Cohort Studies)

|                                                                                                     | Albers et al<br>2004 | Bazylewic<br>z-Walczak<br>et al 1999 | Daniell et<br>al 1992 | Ohayo-Mit<br>oko et al<br>2000 | Misra et al<br>1985 | Ross et al<br>2010 |
|-----------------------------------------------------------------------------------------------------|----------------------|--------------------------------------|-----------------------|--------------------------------|---------------------|--------------------|
| <b>Selection</b>                                                                                    |                      |                                      |                       |                                |                     |                    |
| 1) Representativeness of the exposed cohort                                                         |                      |                                      |                       |                                |                     |                    |
| a) Truly representative of the average farmers or pesticides applicators in the community           |                      |                                      |                       |                                |                     |                    |
| b) Somewhat representative of the average or pesticides applicators in the community                | c) (0)               | c) (0)                               | a) (+1)               | b) (+1)                        | c) (0)              | a) (+1)            |
| c) Selected group of users                                                                          |                      |                                      |                       |                                |                     |                    |
| d) No description of the derivation of the cohort                                                   |                      |                                      |                       |                                |                     |                    |
| 2) Selection of the non exposed cohort                                                              |                      |                                      |                       |                                |                     |                    |
| a) Drawn from the same community as the exposed cohort                                              |                      |                                      |                       |                                |                     |                    |
| b) Drawn from a different source                                                                    | b) (0)               | a) (+1)                              | b) (0)                | a) (+1)                        | b) (0)              | b) (0)             |
| c) No description of the derivation of the non exposed cohort                                       |                      |                                      |                       |                                |                     |                    |
| 3) Ascertainment of exposure                                                                        |                      |                                      |                       |                                |                     |                    |
| a) Secured record (e.g. biomarkers)                                                                 |                      |                                      |                       |                                |                     |                    |
| b) Structured interview or questionnaire                                                            | a) (+1)              | a) (+1)                              | a) (+1)               | b) (+1)                        | a) (+1)             | b) (+1)            |
| c) Written self report                                                                              |                      |                                      |                       |                                |                     |                    |
| d) No description                                                                                   |                      |                                      |                       |                                |                     |                    |
| 4) Demonstration that outcome of interest was not present at start of study                         |                      |                                      |                       |                                |                     |                    |
| a) Yes                                                                                              | a) (+1)              | a) (+1)                              | a) (+1)               | a) (+1)                        | a) (+1)             | a) (+1)            |
| b) No                                                                                               |                      |                                      |                       |                                |                     |                    |
| <b>Confounders</b>                                                                                  |                      |                                      |                       |                                |                     |                    |
| 1) Comparability of groups on the basis of the design or analysis                                   |                      |                                      |                       |                                |                     |                    |
| a) Study controls for age and education                                                             | - (0)                | a) (+1)                              | b) (+1)               | - (0)                          | a) (+1)             | a) (+1)            |
| b) Study controls for any additional factor (e.g. alcohol consumption, smoking, and first language) |                      |                                      |                       |                                |                     |                    |

Continued...

Table2 Continued

|                                                                                                                                    |                     |             |             |                     |                       |             |
|------------------------------------------------------------------------------------------------------------------------------------|---------------------|-------------|-------------|---------------------|-----------------------|-------------|
| <b>Outcome</b>                                                                                                                     |                     |             |             |                     |                       |             |
| 1) Assessment of outcome                                                                                                           |                     |             |             |                     |                       |             |
| a) Independent blind assessment                                                                                                    | b) (+1)             | d) (0)      | d) (0)      | c) (0)              | d) (0)                | d) (0)      |
| b) Record linkage                                                                                                                  |                     |             |             |                     |                       |             |
| c) Self report                                                                                                                     |                     |             |             |                     |                       |             |
| d) No description                                                                                                                  |                     |             |             |                     |                       |             |
| 2) Was follow-up long enough for outcomes to occur                                                                                 |                     |             |             |                     |                       |             |
| a) Yes (select adequate follow up period for outcome of interest)                                                                  | b) (0)              | b) (0)      | b) (0)      | b) (0)              | b) (0)                | a) (+1)     |
| b) No                                                                                                                              |                     |             |             |                     |                       |             |
| 3) Adequacy of follow up of cohorts                                                                                                |                     |             |             |                     |                       |             |
| a) Complete follow up-all subjects accounted for                                                                                   |                     |             |             |                     |                       |             |
| b) Subjects lost to follow up unlikely to introduce bias- small number lost- >70% follow up, or description provided of those lost | b) (+1)             | a) (+1)     | a) (+1)     | c) (0)              | d) (0)                | d) (0)      |
| c) Follow up rate<70% and no description of those lost                                                                             |                     |             |             |                     |                       |             |
| d) No statement                                                                                                                    |                     |             |             |                     |                       |             |
| Overall Score                                                                                                                      | 4/8<br>Satisfactory | 5/8<br>Good | 5/8<br>Good | 4/8<br>Satisfactory | 3/8<br>Unsatisfactory | 5/8<br>Good |



**Table 3 Quality Appraisal (Case-control Studies)**

|                                                                           | Beseler et al 2006 |
|---------------------------------------------------------------------------|--------------------|
| <b>Selection</b>                                                          |                    |
| 1) Is the case definition adequate?                                       |                    |
| a) Yes, with independent validation                                       |                    |
| b) Yes, e.g. record linkage or based on self reports                      | b) (0)             |
| C) No description                                                         |                    |
| 2) Representativeness of the cases                                        |                    |
| a) Consecutive or obviously representative series of cases                | a) (+1)            |
| b) Potential for selection biases or not stated                           |                    |
| 3) Selection of Controls                                                  |                    |
| a) Community controls                                                     | a) (+1)            |
| b) Hospital controls                                                      |                    |
| C) No description                                                         |                    |
| 4) Definition of Controls                                                 |                    |
| a) No history of disease (endpoint)                                       | a) (+1)            |
| b) No description of source                                               |                    |
| <b>Confounders</b>                                                        |                    |
| 1) Comparability of cases and controls on the basis of design or analysis |                    |
| a) Study control for age and education                                    | b) (+1)            |
| b) Study controls for any additional factor                               |                    |
| <b>Exposure</b>                                                           |                    |
| 1) Ascertainment of exposure                                              |                    |
| a) Secure record(biomarkers)                                              |                    |
| b) Structured interview where blind to case/control status                |                    |
| c) Interview not blinded to case/control status                           | d) (0)             |
| d) Written self report or medical record only                             |                    |
| e) No description                                                         |                    |

Continued...

1  
2  
3  
4  
5  
6  
7  
8  
9  
10  
11  
12  
13  
14  
15  
16  
17  
18  
19  
20  
21  
22  
23  
24  
25  
26  
27  
28  
29  
30  
31  
32  
33  
34  
35  
36  
37  
38  
39  
40  
41  
42  
43  
44  
45  
46  
47  
48  
49  
50  
51  
52  
53  
54  
55  
56  
57  
58  
59  
60

Table3 Continued

|                                                                                                      |             |
|------------------------------------------------------------------------------------------------------|-------------|
| 2) Same method of ascertainment for cases and controls                                               | a) Yes      |
| a) Yes<br>b) No                                                                                      |             |
| 3) Non-response rate                                                                                 | b) (0)      |
| a) Same rate for both groups<br>b) Non respondents described<br>c) Rate different and no designation |             |
| Overall Score                                                                                        |             |
|                                                                                                      | 5/8<br>Good |

For peer review only

1  
2  
3  
4  
5  
6  
7  
8  
9  
10  
11  
12  
13  
14  
15  
16  
17  
18  
19  
20  
21  
22  
23  
24  
25  
26  
27  
28  
29  
30  
31  
32  
33  
34  
35  
36  
37  
38  
39  
40  
41  
42  
43  
44  
45  
46  
47  
48  
49  
50  
51  
52  
53  
54  
55  
56  
57  
58  
59  
60

For peer review only

# BMJ Open

## A systematic review of the influence of occupational organophosphate pesticides exposure on neurologic impairment

|                                 |                                                                                                                                                                                             |
|---------------------------------|---------------------------------------------------------------------------------------------------------------------------------------------------------------------------------------------|
| Journal:                        | <i>BMJ Open</i>                                                                                                                                                                             |
| Manuscript ID:                  | bmjopen-2014-004798.R1                                                                                                                                                                      |
| Article Type:                   | Research                                                                                                                                                                                    |
| Date Submitted by the Author:   | 08-May-2014                                                                                                                                                                                 |
| Complete List of Authors:       | Takahashi, Noriko; Institute of Tropical Medicine, Nagasaki University, Pediatric infectious diseases<br>Hashizume, Masahiro; Institute of Tropical Medicine, Pediatric Infectious Diseases |
| <b>Primary Subject Heading</b>: | Epidemiology                                                                                                                                                                                |
| Secondary Subject Heading:      | Public health                                                                                                                                                                               |
| Keywords:                       | Epidemiology < TROPICAL MEDICINE, Public health < INFECTIOUS DISEASES, Environmental Health                                                                                                 |
|                                 |                                                                                                                                                                                             |

SCHOLARONE™  
Manuscripts

1  
2  
3  
4 Title: A systematic review of the influence of occupational organophosphate pesticides exposure on  
5  
6 neurologic impairment  
7

8  
9  
10 Authors:

11  
12 Noriko Takahashi

13  
14 Masahiro Hashizume

15  
16  
17  
18 Authors' Institutions:

19  
20 Department of Pediatric Infectious Diseases, Institute of Tropical Medicine, Nagasaki University,  
21  
22 1-12-4 Sakamoto, Nagasaki 852-8523, Japan  
23  
24

25  
26  
27 Address for correspondence:

28  
29 Noriko Takahashi

30  
31 Department of Pediatric Infectious Diseases, Institute of Tropical Medicine, Nagasaki University

32  
33 1-12-4 Sakamoto, Nagasaki 852-8523, Japan

34  
35  
36  
37  
38  
39 Tel: (+81) 95 819 7764 Fax: (+81) 95 819 7844

40  
41  
42 E-mail: [pediatric.nagasaki@gmail.com](mailto:pediatric.nagasaki@gmail.com)

43  
44 Key words: Organophosphate, Pesticides, Central Nervous System, Neurologic, Impairment

45  
46  
47 Word count, main text: 4173

48  
49  
50 Number of Tables/Illustrations: 4

51  
52  
53 Number of References: 41

## ABSTRACT

**Objective:** The aim of this study was to conduct a systematic review of published literature and to estimate whether or not there is a causal relationship between occupational exposure to Organophosphate pesticides (OPs) and either neurologic impairment or depressive symptoms.

**Data sources:** EMBASE, MEDLINE, Global Health, and PsycINFO (1980 to April 2014).

**Setting:** Observational studies (cross-sectional, cohort, and case-control studies) with both exposed and unexposed groups.

**Participants:** People who occupationally use OPs more than one month and their family.

**Primary outcome:** Results of neurological core test batteries or depressive symptoms such as headaches, anxiety, and dizziness.

**Study appraisal and synthesis methods:** After an extensive search of various literature databases, one author screened titles and abstracts, searched the relevant publications manually, and conducted data extraction. All extracted data from the selected articles were synthesized for analysis. Quality appraisal was conducted using Newcastle Ottawa Scale.

**Results:** Of the 1024 articles retrieved by database search, 24 studies that met inclusion and exclusion criteria were selected for analysis. Of the selected studies, 17 were cross-sectional and the remaining seven were cohort and nested case-control studies. The geographical areas included in the studies were USA (10 studies), UK (four studies), Africa (four studies), Asia (three studies), Europe (two studies), and South America (one study). Each of the included studies used different exposure

1  
2  
3  
4 and outcome assessments such as neurologic scores and depressive symptoms, making it difficult to  
5  
6  
7 compare the results exactly. Most studies showed that exposed groups had poorer results than  
8  
9  
10 unexposed groups; however, because of inconsistent neurological test batteries there was not enough  
11  
12  
13 pooling evidence to conduct a meta-analysis.

14  
15 **Conclusion:** The findings of this literature review indicate that it is a necessary to standardize the  
16  
17  
18 neurological or neuropsychological test battery and methods of measuring exposure to OPs.  
19

20  
21 **Trial registration:** Not applicable.  
22  
23  
24  
25  
26  
27  
28  
29  
30  
31  
32  
33  
34  
35  
36  
37  
38  
39  
40  
41  
42  
43  
44  
45  
46  
47  
48  
49  
50  
51  
52  
53  
54  
55  
56  
57  
58  
59  
60

## ARTICLE SUMMARY

### Article Focus

- To systematically review epidemiological studies that examine adverse effects on the human central nervous system (CNS) by exposure to organophosphate pesticides (OPs).

### Key messages

- OPs have been used widely all over the world for agricultural or industrial use.
- Many studies have examined acute health problems caused by OPs; however, few studies have investigated negative effects caused by occupational OPs exposure.

### Strengths and limitations of this study

- The article represents a systematic review of epidemiological studies on adverse effects on the human CNS by occupational OPs exposure, with a quality appraisal of each study.
- The article identifies problematic issues of exposure and outcome assessments.
- Meta-analysis could not be applied because only a small number of pooled studies were available.
- In some studies it was difficult to judge negative effects caused only by OPs, because mixed pesticides were used.



## INTRODUCTION

Ever since organophosphate pesticides (OPs) were developed, they have been used to combat insects for public health purposes and to support agricultural productivity and manufacturing processes. Because pesticides are also one of the leading suicide methods, a large number of epidemiological studies have investigated the relationship between high level OPs exposure such as pesticide poisoning and accidents and acute health effects. It has been reported that high level OPs exposure is significantly related to neurological or neuropsychological impairment (1, 2). In contrast, few studies have reported associations between occupational or cumulative OPs exposure and negative effects on human health, although some research has examined the negative influence on young children of cumulative OPs exposure (3, 4) and others have investigated relationships between reproductive health and occupational OPs exposure (5-7). High level OPs exposure are known to have adverse effects on the human CNS, therefore, occupational or cumulative OPs exposure also has the potential to negatively affect the CNS. However, very few epidemiological studies that have assessed the relationships between occupational OPs exposure and neurologic or mental problems have been published. The objective of this systematic review is to verify whether or not occupational OPs exposure negatively affects the human CNS. To investigate this further, we summarized the epidemiological evidence for the relationship between occupational OPs exposure and mental and neuropsychological aggression, especially for occupational OP users, and some of the limitations associated with the various studies are discussed.

## MATERIALS AND METHODS

### Searching strategy for identification of published studies

We searched the published literature using the OvidSP search software (8) to select relevant observational studies. A geographical restriction was not imposed; however, the search was restricted to studies published from 1980 to 2014. Population-based case-control studies were excluded from the systematic review because it was difficult to assess accurate exposure doses for these studies. Because various pesticides including OPs are currently easily available to everyone, it is highly likely that these pesticides have been obtained for personal use. For this reason, it is almost impossible to obtain past records of pesticide use by every individual. The literature search was limited to studies in humans and to reports published in English, and the review was limited to epidemiological studies. Moreover, unpublished studies and grey literature (literature that has not been formally published) were not searched in this systematic review; therefore we did not contact authors to find unpublished studies. Studies investigating OPs exposure through food and water contamination were also excluded. A search of the following four databases was carried out: EMBASE Classic + EMBASE (1980 to Week13 2014); Ovid MEDLINE(R) (1980 to Week13 2014); Global Health (1980 to Week12 2014); and PsycINFO (1980 to Week14 2014).

A combination of free-text terms and explore terms was used to identify relevant articles. For exposure, the following search keywords were used: organophosphate\*, organophosphorous,

1  
2  
3  
4 pesticide\*, or insecticide\*, and organophosphate pesticide (explore map term). For outcome, the  
5  
6  
7 following search keywords were used: neuro\*, psychiatr\*, psycholog\*, mental health, mental illness,  
8  
9  
10 mental disorder, or depressi\*, depression (explore map term), and mental health (explore map term).  
11  
12 For subjects, the following search keywords were used: occupation\*, agricultu\*, or farm\*. For study  
13  
14  
15 design, the following search keywords were used: epidemiolog\*, cohort, cross-sectional, or  
16  
17  
18 case-control, and epidemiology (explore map term). An initial systematic search in the titles and  
19  
20  
21 abstracts was conducted using a combination of all these search terms. A second manual search of  
22  
23  
24 the reference lists from the selected relevant articles was performed to explore or retrieve articles  
25  
26  
27 found in the initial search in order to find as many available studies as possible.  
28  
29  
30  
31  
32

### 33 **Criteria for selecting studies for review**

34  
35  
36 Only original research articles meeting the inclusion and exclusion criteria described below were  
37  
38  
39 used in the final review.  
40  
41  
42  
43

#### 44 Inclusion criteria:

##### 47 1. Study design

- 50 a) Must be observational studies: cross-sectional, cohort, and case-control studies.
- 51
- 52
- 53 b) Studies must have both exposed and unexposed groups.
- 54

##### 56 2. Subjects

1  
2  
3  
4 a) The subjects in the exposed group either must use OPs occupationally, or there must be a  
5  
6  
7 probability of being exposed to OPs during their work.

8  
9  
10 b) The families of occupational OP users can be treated as subjects.

### 11 12 3. Exposure

13  
14  
15 a) Subjects must be exposed to OPs for at least one month.

16  
17  
18 b) Seasonal workers who used OPs for more than one month must be included.

### 19 20 21 4. Outcome

22  
23  
24 Studies must have carried out some tests to assess damage to the CNS or have conducted a survey  
25  
26  
27 or an interview to identify depressive symptoms.

### 28 29 30 5. Exposure-outcome association

31  
32  
33 Results must be reported as some types of relative risks or mean scores.

### 34 35 36 37 38 Exclusion criteria:

#### 39 40 41 1. Study design

42  
43  
44 Experimental and laboratory based studies including animal studies were excluded.

45  
46  
47 Population-based case-control studies were excluded.

#### 48 49 50 2. Subjects

51  
52  
53 Studies of mainly patients of pesticide poisoning were excluded.

#### 54 55 56 3. Exposure

1  
2  
3  
4 Studies that did not specify the type of pesticides were excluded.  
5  
6

7 4. Outcome  
8

9  
10 Studies examining damage of the peripheral nervous system due to OPs exposure were excluded.  
11

12  
13 5. Language  
14

15  
16 Studies published in a language other than English were excluded.  
17  
18  
19  
20

21 **Definitions used for the review**  
22

23  
24 *Definition of cumulative exposure*  
25

26  
27 a) People who used OPs in their jobs for at least one month and had the probability of inhaling  
28  
29 ambient OPs and absorbing OPs by spraying and touching.  
30  
31

32  
33 b) Families of OP users were included as subjects because they may have been exposed to OPs by  
34  
35 washing clothes contaminated by OPs and/or by touching OP users.  
36  
37

38 *Definition of poor mental health*  
39

40  
41 A) Neurological or neuropsychological impairment  
42

43  
44 a) People who had poorer results in neurological or neuropsychological test batteries than healthy  
45  
46 people of the same age.  
47  
48

49  
50 b) People who had short-memory loss; for example, people who had experienced memory loss of  
51  
52 six to three months duration.  
53  
54

55  
56 B) Depressive Symptom  
57  
58

1  
2  
3  
4 c) People who, regardless of their age, had chronic depressive symptoms including headache,  
5  
6  
7 fatigue, dizziness, sleepless, and eye problems.

8  
9  
10 d) People who were diagnosed with depression by clinical doctors.  
11

### 12 13 14 15 **Study selection process** 16

17  
18 Using the search terms listed above, a total of 1024 references were obtained: 515 from EMBASE  
19  
20 Classic + EMBASE, 31 from PsycINFO, 196 from Global Health, and 282 from Ovid MEDLINE(R)  
21  
22 (Figure1). However, 77 animal studies, 90 studies not in English studies, and 12 studies that did not  
23  
24 meet the time restrictions were excluded. Of the remaining 845 studies, 516 were excluded because  
25  
26 of duplications. A manual search of the titles and abstracts of the remaining 329 references excluded  
27  
28 a further 272 studies. The 21 remaining articles were fully reviewed, after which 12 studies were  
29  
30 deemed to meet inclusion and exclusion criteria (9-20). In addition, 12 articles identified by the  
31  
32 manual search were added to the systematic review (Figure1). To include as many relevant studies as  
33  
34 possible, studies published before 1980 that were found by the manual search were included to the  
35  
36 list for review. Finally, these 24 studies were selected for data extraction (9-32).  
37  
38  
39  
40  
41  
42  
43  
44  
45  
46  
47  
48  
49

### 50 **Data extraction, synthesis, and analysis** 51

52  
53 Data extraction forms were created to compare relevant data collected from each of the 24 studies.  
54  
55  
56 The following data were extracted to assess heterogeneity of the included studies: title, authors, year  
57  
58  
59  
60

1  
2  
3  
4 published, number of subjects in the exposed and unexposed groups, occupation, and demographic  
5  
6  
7 information such as mean age, sex, smoking status, and geographical area. In addition, the following  
8  
9  
10 data were extracted to assess confounding factors and statistical models among the included studies:  
11  
12  
13 inclusion and exclusion criteria such as first language, alcohol consumption, injury experience,  
14  
15  
16 confounding factors, and statistical methods used. The following data were extracted to assess  
17  
18  
19 exposure and outcomes: types of pesticides, exposure assessment, and outcome assessment to  
20  
21  
22 measure the neurologic or neuropsychological ability, and results obtained. Tables containing the  
23  
24  
25 data that were obtained using the data extraction forms were constructed and analyzed. P-values and  
26  
27  
28 95% confidence intervals (95% CIs) were elicited from the articles to judge statistical uncertainty.  
29  
30  
31 When a study had investigated depressive symptoms, the information was collected and a table was  
32  
33  
34 constructed. Impact and statistical magnitude of depressive symptoms were represented using plus or  
35  
36  
37 minus signs ‘++’, ‘+’, and ‘-’, based on the P-value or 95%CI of the studies. All data extraction,  
38  
39  
40 coding, and quality appraisal were conducted only by the first author; therefore, no disagreement  
41  
42  
43 events occurred.  
44  
45  
46

### 47 **Quality appraisal**

48  
49  
50 The quality of the 24 studies was appraised using a scale adapted from the ‘Newcastle/Ottawa Scale  
51  
52  
53 (NOS)’(33) (The appraisal standard of NOS is shown in Appendix A). Based on the NOS, each study  
54  
55  
56 was evaluated using the point system. When a study included relevant information that could be  
57  
58  
59  
60

1  
2  
3  
4 associated to the NOS, one point was added. Five items in cross-sectional studies and eight items in  
5  
6 cohort and case-control studies that could be related to the NOS were identified. Therefore,  
7  
8 cross-sectional studies assigned 5, 4, 3, or 0–2 points were evaluated as very good, good, satisfactory,  
9  
10 or unsatisfactory studies, respectively. Similarly, cohort/case-control studies with 7–8, 5–6, 4, and  
11  
12 0–3 points were identified as very good, good, satisfactory, or unsatisfactory, respectively.  
13  
14  
15  
16  
17  
18  
19  
20

## 21 **RESULTS**

22  
23  
24 As a result of the search strategy described in the Materials and Methods section, 12 studies were  
25  
26 identified from the database search and another 12 studies were found after a manual search. These  
27  
28 24 articles, published between 1975 and 2010, met all the inclusion and exclusion criteria. A  
29  
30 summary of the characteristics of the 24 selected articles is shown in Table 1.  
31  
32  
33  
34  
35  
36  
37  
38

### 39 **Study design and geographical area**

40  
41 Of the selected studies, 17 were cross-sectional and the remaining seven were cohort and nested  
42  
43 case-control studies. The geographical areas included in the studies were USA (10 studies), UK (four  
44  
45 studies), Africa (four studies; two in South Africa, one in Egypt, and one in Kenya), Asia (three  
46  
47 studies; two in India and one in Sri Lanka), Europe (two studies; one in Spain and one in Poland),  
48  
49 and South America (one study; Ecuador).  
50  
51  
52  
53  
54  
55  
56  
57  
58  
59  
60



### Characteristics of subjects

Because the subjects were limited to people who had the probability of being occupationally exposed by OPs, the majority of the participants (60–70%) were men. Most of the time, agricultural work such as pesticide application and farming is performed predominantly by men. Six of the 24 studies included both male and female subjects (9, 11, 17, 25, 27, 32), and only one study used all female subjects in both the exposed and control groups (21). In 13 of the studies the mean age of the exposed subjects was in the 30s, in six studies the mean age was in the 40s (9, 14, 15, 19, 20, 31), and in two studies the mean age was in the 50s (13, 17). The mean age in two studies was 29, very close to thirty (25, 32). One of the studies did not report detailed demographic data of the participants (10).

### Source of recruitment and sample size

Ten out of the 24 studies were on pesticide applicators including private, commercial, and tree, fruit, and vegetable applicators. Five and three studies were on farmers and sheep farmers, respectively, and two studies were on factory workers and greenhouse workers. One study investigated depressive symptoms in the spouses of OPs users. In the study by Korsak et al. (22), the specific occupation of the population in the study was not stated, however, the subjects had experienced occupational OPs exposure. The number of subjects in the exposed groups varied from 16 to 2,051, while the control groups had a wider range of subjects (16 to 27,023).

Table 1 Findings reported in epidemiological studies into occupational low level OPs exposure and mental illness

|    | Author                        | Study Design | Country      | Exposed Population(No)                                                                | Chemical       | Exposed Assessment           | Comparison Group                                                              |
|----|-------------------------------|--------------|--------------|---------------------------------------------------------------------------------------|----------------|------------------------------|-------------------------------------------------------------------------------|
| 1  | Albers et al (9)              | CO           | USA          | Chemical workers(53)                                                                  | OP             | Industrial HR,AChE INH       | Similar workers, not exposed(60)                                              |
| 2  | Bazylewicz-Walczak et al (21) | CO           | Poland       | Greenhouse workers(26)                                                                | OP             | DR                           | Greenhouse workers, not exposed(25)                                           |
| 3  | Beseler et al (10)*           | NC/ CO       | USA          | Case** <sup>†</sup> : Spouses of private applicators with depressive diagnoses(2,051) | OP             | QU or IN                     | Control: Spouses of private applicators without depressive diagnoses (27,023) |
| 4  | Cole et al (11)               | CR           | Ecuador      | Farmers, some applicators(144)                                                        | OP,CAR,<br>FNG | IN, QU, AChE INH             | Local Population(72)                                                          |
| 5  | Daniell et al (12)            | CO           | USA          | Farm worker applicators(49)                                                           | OP             | QU, AChE INH                 | Slaughterhouse workers(40)                                                    |
| 6  | Dassanayake et al (13)        | CR           | Sri Lanka    | Vegetable farm workers (38)                                                           | OP             | N.A.                         | hospital labours(35)                                                          |
| 7  | Farahat et al (14)            | CR           | Egypt        | Farm workers(52)                                                                      | OP             | AChE INH                     | Local Population(50)                                                          |
| 8  | Fiedler et al (15)            | CR           | USA          | Tree fruit farmers (57)                                                               | OP             | QU, lifetime exposure metric | Cranbury/blueberry growers(low exposed), hardware storeowners(unexposed) (42) |
| 9  | Korsak et al (22)             | CR           | USA          | Occupational exposure(16)                                                             | OP, CAR,<br>OC | AChE INH                     | Local Population(low exposure)(16)                                            |
| 10 | Levin et al (23)*             | CR           | USA          | Pesticide applicators(24)                                                             | OP             | IN, AChE INH                 | Farmers(24)                                                                   |
| 11 | London et al (16)             | CR           | South Africa | Fruit farm pesticide applicators(163)                                                 | OP             | QU(job-matrix)               | Farm workers, not applicators(84)                                             |
| 12 | London et al(24)*             | CR           | South Africa | Fruit farm pesticide applicators(164)                                                 | OP             | QU (job-matrix)              | Farm workers, not applicators(83)                                             |
| 13 | Maizlish et al (25)           | CR           | USA          | Pesticide applicators(46)                                                             | OP             | UM, DR                       | Non-applicators(56)                                                           |
| 14 | Misra et al (26)*             | PR           | India        | Pesticide applicators(22)                                                             | OP             | AChE INH                     | Hospital labours(20)                                                          |

|    |                          |    |       |                              |         |                |                                            |
|----|--------------------------|----|-------|------------------------------|---------|----------------|--------------------------------------------|
| 15 | Ohayo-Mitoko et al (27)* | CO | Kenya | Farm worker applicators(256) | OP, CAR | AChE INH       | Farm workers(low exposure)(152)            |
| 16 | Rodnitzky et al (28)     | CR | USA   | Pesticide applicators(23)    | OP      | AChE INH       | Farmers(23)                                |
| 17 | Roldan-Tapia et al (18)  | CR | Spain | Greenhouse workers(40)       | OP, CAR | QU, AChE INH   | Local Population(26)                       |
| 18 | Ross et al (17)          | CO | UK    | Sheep farmers(127)           | OP      | IN             | Police workers(78)                         |
| 19 | Rothlein et al(32)       | CR | USA   | Farm workers(96)             | OP      | UM, House dust | Workers in hotels and tourist industry(45) |
| 20 | Srivastava et al(29)     | CR | India | Manufacture workers(59)      | OP      | AChE INH       | Manufacture workers, not exposed(17)       |
| 21 | Steenland et al(30)      | CR | USA   | Termiticide applicators(191) | OP      | IN,UM          | Friends, blue collar workers(189)          |
| 22 | Stephens et al (19)      | CR | UK    | Sheep farmers(146)           | OP      | QU             | Quarry workers(143)                        |
| 23 | Stephens et al (31)      | CR | UK    | Sheep farmers(77)            | OP      | QU, UM         | Quarry workers(69)                         |
| 24 | Stephens et al (20)      | CR | UK    | Orchard applicators(37)      | OP      | IN,QU          | Construction workers,pig farmers(57)       |

Study Design CR: Cross-sectional, CO: Cohort, NC: Nested case-control, PR: Prospective study

Chemical OP: Organophosphates, OC: Organochlorines, CAR: Carbamates, FUN: Fungicides, AChE: Acetylcholinesterase

Exposed Assessment AChE INH: AChE inhibition, DR: Dermal and respiratory absorption, IN: Interview, QU: Questionnaire, HR: Hygiene records UM: Urinary metabolites

\*Studies that included depressive symptoms for outcome assessments.

\*\*Cases were defined as female spouses of private applicators who responded 'yes' to the question "Has a DOCTOR ever told you that you had been diagnosed with depression requiring medication?" Controls were female spouses who responded 'no' (10).

## Exposure assessment

Exposure assessment in the included studies could be divided, for the most part, into five patterns: indirect assessment using, for example, an interview or questionnaire; direct assessment including a measurement of urinary metabolites and acetylcholinesterase (AChE) levels in the blood or a measurement of ambient OPs using a patch and a pump; combination of direct and indirect methods; combination of a biomarker and OPs exposure levels included in house dust; and combination of biomarkers and ambient OP levels. Seven of the 24 studies used indirect methods, and six studies used blood AChE inhibition levels to measure AChE levels in the blood as an exposure indicator. Six studies used a combination of indirect methods and biomarkers, three studies used biomarkers and the ambient OP levels, one study used a biomarker and house dust. The remaining study did not mention any exposure assessment methods. In all the studies that used urinary metabolites as exposure assessment, the results were presented as the sum of dialkylphosphates (DAP) (i.e. the sum of six DAP metabolites: DMP (dimethylphosphate), DMTP (dimethylthiophosphate), DMDTP (dimethyldithiophosphate), DEP (diethylphosphate), DETP (diethylthiophosphate), and DEDTP (diethyldithiophosphate)) (25, 30-32).

### Outcome measurements

Two different outcome measurements were used in the studies; one measured neurological impairment and the other assessed depressive symptoms. Of the 24 studies, 19 used cognitive function tests to investigate negative neurologic influences caused by OPs exposure.

### Associations between outcome and exposure

Ten of the 19 studies that investigated cognitive impairment mentioned that at least one measure outcome showed more impairment in the exposed groups; however, these observations were not significant ( $P < 0.05$ ). Seven of the studies reported some significant positive associations of exposure with poor outcome ( $P < 0.05$ ); however, even in these cases, the significant decrements were observed only in some of the neurologic tests, mainly in the Digit Span and Santa Ana Dexterity tests. Indeed, there are several versions of these neurologic tests and the significance of the scores often depended on the versions of the tests that were used. Five studies used the Wechsler Adult Intelligence Scale (WAIS or WAIS-R) (34, 35), four studies used the Neurobehavioral Evaluation System (NES) (36), two studies used the World Health Organization Neurobehavioral Core Test Battery (NCTB) (37, 38), and the remaining

eight studies used their own scales.

Five studies adopted depressive symptoms as outcome measurements, as shown in Table2; however, the symptoms used in the studies were not standardized.

Table2 Summary of depressive symptoms used as outcome measurements

| Reference                      | Results obtained                                                                                                                                                                                                                                   | Impact of outcomes |
|--------------------------------|----------------------------------------------------------------------------------------------------------------------------------------------------------------------------------------------------------------------------------------------------|--------------------|
| Beseler et al<br>2006(10)      | Depression due to doctor's diagnosis was not significantly related to low (OR 1.09; 95%CI 0.91, 1.31) or high (OR 1.09; 95%CI 0.91, 1.31) cumulative exposure.                                                                                     | -                  |
| Levin et al<br>1976(23)        | Anxiety score of the pesticide applicators was significantly higher (P<0.05) than that of the farmers. However, there was no significant difference in measures of depression.                                                                     | ++                 |
| London et al<br>1998(24)       | Dizziness, sleepiness, and headache had a significantly higher overall neurological symptom score (P<0.05).                                                                                                                                        | ++                 |
| Misra et al<br>1985(26)        | Common symptoms were Headache (59%), giddiness (50%), ocular symptoms (27%), and paresthesia (18%) and no neurologic change was seen.                                                                                                              | -                  |
| Ohayo-Mitoko et al<br>2000(27) | A significant change in symptom prevalence was found for the respiratory (2.48% CI (0.78, 5.38) and central nervous system (2.56% CI (0.99, 6.62), but in terms of skin symptoms, and eye symptoms, there was no statistically significant change. | ++                 |

OR=Odds Ratio ++: Statistically significant (P<0.05), -: Not statistically significant

### Statistical analysis

Sixteen studies used logistic regression, and the remaining eight used other statistical tests including X<sup>2</sup>-test and t-test. Only one study adjusted for sex in the logistic

1  
2  
3  
4  
5  
6 regression. Fourteen of the 24 studies adjusted for age, and 12 adjusted for education in  
7  
8  
9 the statistical analysis. However, only five studies adjusted for alcohol consumption  
10  
11  
12 before carrying out the statistical analysis, and only two studies adjusted for first  
13  
14  
15 language.

### 20 **Methodological quality appraisal**

21  
22  
23 Based on NOS, five of the 24 studies were of very good quality, 10 were of good  
24  
25  
26 quality, and the remaining nine were either satisfactory or unsatisfactory. Most studies  
27  
28  
29 with unsatisfactory scores either were carried out before 1990 or were performed in  
30  
31  
32 some of the less developed countries. In particular, the methods of recruitment of  
33  
34  
35 subjects, controlling for confounders, and outcome assessment were not appropriate.  
36  
37  
38 For example, in some studies, all of the participants were volunteers (14, 28) and in  
39  
40  
41 another study, the subjects were not representative of the community from which they  
42  
43  
44 were recruited (factory workers) (29). In addition, in the unsatisfactory studies, how the  
45  
46  
47 outcome was assessed was not described, and methods needed to avoid confounders  
48  
49  
50 such as stratification and regression were not used. None of the cohort studies were  
51  
52  
53 assessed as very good quality because most of them did not have a long enough  
54  
55  
56 follow-up duration (in five studies, the duration was less than six months) and the  
57  
58  
59  
60

1  
2  
3  
4  
5  
6 selected subjects were not fully representative of the target community. Moreover, the  
7  
8  
9 methods of outcome assessment were not described in most of the cohort studies.  
10

### 11 12 13 14 15 **Data synthesis** 16

17  
18 The results of the neurologic tests used in the studies are summarized in Table3. As can  
19  
20 be seen, the test batteries differed from study to study. The commonly used test batteries  
21  
22 in NCTB, NES, and WAIS were Symbol-Digit and Digit Span Forward and Backward.  
23  
24 However, some studies that adopted NES and WAIS to measure neurologic impairment  
25  
26 implemented only a few subsets in the trials. Among the 13 studies that used a  
27  
28 Symbol-Digit test, four used NES and unknown tests, two used WAIS and WAIS-R, and  
29  
30 one used a Polish NCTB. Among the studies that used Digit Span Forward and  
31  
32 Backward tests, some studies performed both tests, while the others did only one of the  
33  
34 tests as shown in Table3. Overall, only four of the studies used the same test battery in  
35  
36 NES and WAIS. Although three studies apparently used the same scoring systems, one  
37  
38 of the scores was completely different from the scores in the other two studies. For  
39  
40 example, the scores in the study by Stephens et al. (31) were 24.22 and 21.01 in the  
41  
42 exposed and the control groups respectively, whereas the scores reported by Daniell et  
43  
44 al. and Stephens et al. were much lower and between 2.23 and 3.55 (12, 20). Similarly,  
45  
46  
47  
48  
49  
50  
51  
52  
53  
54  
55  
56  
57  
58  
59  
60



the mean scores reported by Bazylewicz-Walczak et al. (21) were higher, 45.50 and 49.40, while the mean scores reported in the other studies were smaller, 2.28 and 2.23 in the WAIS (25). In consideration of insufficient number of studies and possible systematic differences in the population characteristics and/or in the measurement procedures between the studies, we decided not to conduct a meta-analysis.

Table3 Summary of the neurologic test batteries used in some of the studies

| Reference                         | Types of neurologic tests       | Symbol Digit     | Digit Span                                                       | Santa Ana | Simple Reaction Time | Syntactic Reasoning(s) |
|-----------------------------------|---------------------------------|------------------|------------------------------------------------------------------|-----------|----------------------|------------------------|
| Bazylewicz-Walczak et al 1999(21) | Polish NCTB/WAIS (Symbol Degit) | nd               | nd                                                               | nd        | **                   | nd                     |
| Cole et al 1997(11)               | NCTB                            | nm               | nm                                                               | nm        | nd                   | nd                     |
| Daniell et al 1992(12)            | NES                             | *                | nd                                                               | nd        | nd                   | nd                     |
| Farahat et al 2003(14)            | Unknown                         | ***              | *** <sup>(f)<sup>1</sup></sup><br>*** <sup>(b)<sup>2</sup></sup> | nd        | nd                   | nd                     |
| Fiedler et al 1997(15)            | WAIS-R                          | *                | *                                                                | nd        | ***                  | nd                     |
| London et al 1997(16)             | WAIS-R                          | nm               | nm                                                               | ***       | nm                   | nd                     |
| Maizlish et al 1987(25)           | WAIS                            | ***              | nd                                                               | nd        | nd                   | nd                     |
| Roldan-Tapia et al 2005(18)       | WAIS                            | *** <sup>3</sup> | *** <sup>3</sup>                                                 | nd        | nd                   | nd                     |
| Ross et al 2010(17)               | WAIS                            | nd               | ***                                                              | nd        | nd                   | nd                     |
| Rothlein et al 2006(32)           | Unknown                         | *                | * <sup>(f)<sup>1</sup></sup><br>*** <sup>(b)<sup>2</sup></sup>   | nd        | *                    | nd                     |
| Srivastava et al 2000(29)         | Unknown                         | ***              | ***                                                              | nd        | nd                   | nd                     |
| Steenland et al 2000(30)          | NES                             | *                | *                                                                | nd        | *                    | nd                     |
| Stephens et al 1995(19)           | Unknown                         | ***              | *                                                                | nd        | ***                  | **                     |
| Stephens et al 1996(31)           | NES/ACT                         | nm               | nm                                                               | nd        | nm                   | nm                     |

|                         |         |   |   |    |   |        |
|-------------------------|---------|---|---|----|---|--------|
| Stephens et al 2004(20) | NES/ACT | * | * | nd | * | ***    |
|                         |         |   |   |    |   | (ACTS) |

\*\*\*P<0.05, \*\*0.05≤P<0.1, \*P>0.1

The exposed groups were slower or had poorer outcomes than the control groups

<sup>1</sup>(f) Digit Span Forward

<sup>2</sup>(b) Digit Span Backward

<sup>3</sup>Whether the obtained results were positive or negative was not reported in the study.

nd: Subsets of neurological tests were not performed.

nm: Subsets of neurological tests were performed but P-values were not reported.

## DISCUSSION

The systematic keyword and manual searches of the published literature identified 24 epidemiological studies that examined the relationship between OPs and CNS. When the relevant information was assessed, two main findings were obtained, one was the method of exposure assessment, and the other was the method used for the outcome measurement. For exposure assessment, the measurement methods were categorized as direct, indirect, and a combination of direct and indirect. For the outcome measurements, two main assessments were used, neurologic impairment and depressive symptoms.

### Exposure assessment

Exposure assessment was not used for group allocation in all the studies; rather, it was implemented to measure how much subjects were exposed and the outcomes of the neurobehavioral tests. Different exposure assessment methods were used in each study,

1  
2  
3  
4  
5  
6 which made it difficult to accurately compare the studies. In addition, there seemed to  
7  
8  
9 be methodological imperfections in both the direct and indirect methods. For example,  
10  
11  
12 in one study, an interview and questionnaire were used for recruited subjects over 60  
13  
14 years old who had been retired for 11 years (17). This method is subject to recall bias  
15  
16 because the rate of cognitive impairment is likely to have increased as the subjects aged.  
17  
18  
19 However, other indirect methods, especially extensive history records of pesticide use  
20  
21  
22 could be considered as a proxy of how much OPs might have accumulated in the body,  
23  
24  
25 thus records of this type can be used to estimate the amount of OPs by long-term  
26  
27  
28 exposure, even though there may be some recall bias. For the direct methods, DPA or  
29  
30  
31 urinary metabolites was used as an exposure index in the study; however, DPA is  
32  
33  
34 metabolized rapidly and excreted (6). On the contrary, blood AChE levels take  
35  
36  
37 approximately one week to become normal (39); hence, although blood AChE levels  
38  
39  
40 cannot be used to assess the accumulation of OPs in body tissues over a long time, it  
41  
42  
43 can be used to assess short-term exposure. To minimize measurement errors, a mixed  
44  
45  
46 method for the assessment of short-term and long-term exposure should be established.  
47  
48  
49  
50  
51

### 52 **Outcome assessment**

53  
54  
55 The main problem in analyzing the outcome measurements was the inconsistencies in  
56  
57  
58  
59  
60

1  
2  
3  
4  
5  
6 neurologic test batteries. Various versions of the neurologic tests were used in the  
7  
8  
9 studies and the content of the tests differ slightly in each study (Table3). Therefore, only  
10  
11  
12 a few tests were common across some of the studies, which made it difficult to compare  
13  
14  
15 the studies. Further, a meta-analysis could not be applied because of the insufficient  
16  
17  
18 number of studies. Meta-analysis could have been performed by dividing the results into  
19  
20  
21 subgroups; however, the results could be highly misleading because of loss of power  
22  
23  
24 (40). In terms of depressive symptoms, the outcome assessment was again different in  
25  
26  
27 each study. For instance, one study used the proportion of headaches, while another  
28  
29  
30 used dizziness and sleepiness as the main outcomes. To gain better insights into whether  
31  
32  
33 occupational OP exposure can negatively affect the human CNS, at the very least,  
34  
35  
36 neurologic test batteries should be standardized and guidelines for measuring of  
37  
38  
39 neurologic symptoms should be set for all future epidemiological studies. Furthermore,  
40  
41  
42 although some studies mentioned the possible relationship between OPs exposure and  
43  
44  
45 confounding factors such as age and education, statistical tests between the exposed and  
46  
47  
48 control groups were not performed in these studies. These inconsistencies make it  
49  
50  
51 difficult to compare the neurologic impairment outcomes among the studies.  
52  
53  
54

### 55 **Study design**

56  
57  
58  
59  
60

1  
2  
3  
4  
5  
6 Although 17 of 24 studies were cross-sectional studies, longitudinal or cohort studies  
7  
8  
9 are more appropriate, because agricultural work using pesticides is easily influenced by  
10  
11  
12 seasonality. One research regarding reproductive health by OPs exposure stated that  
13  
14  
15 sperm concentration and counts are negatively affected in spring, peak season, rather  
16  
17  
18 than winter (5). Therefore, the effect on the CNS could also be affected by seasonality.  
19

### 20 21 22 23 **Sources of possible biases** 24

25  
26 Only published studies written in English were searched, thus publication bias could  
27  
28  
29 have occurred. In future studies, non-English studies and unpublished studies should be  
30  
31  
32 included to reduce publication bias. In trials that included foreign workers, first  
33  
34  
35 language and education levels could be considered as possible biases because there is a  
36  
37  
38 possibility that non-native subjects did not fully understand the content and instructions  
39  
40  
41 for the tests, which could lead to them obtaining a lower score than native speakers.  
42  
43  
44 Additionally, the education systems in developed and less developed countries could be  
45  
46  
47 very different. Nowadays, developed countries such as USA and the Gulf countries have  
48  
49  
50 accepted foreign workers as an important part of the workforce (12, 32, 41). These  
51  
52  
53 factors needed to be adjusted carefully in the sampling and analytical stages of the  
54  
55  
56 study; however, only two of the selected studies mentioned first language in their  
57  
58  
59  
60

1  
2  
3  
4  
5  
6 statistical analyses (12, 31). Occupation could also contribute to selection bias because,  
7  
8  
9 for example, a police officer or a construction worker would have a higher probability  
10  
11  
12 of experiencing loss of consciousness due to accidents than workers with different  
13  
14  
15 occupations (17).  
16  
17  
18  
19

### 20 **Possible confounders**

21  
22  
23 Apart from common confounders such as age and education, head injury and alcohol  
24  
25  
26 consumption could be other confounders, because they can cause neurologic  
27  
28  
29 impairment due to memory deterioration. Although some of the studies adjusted for  
30  
31  
32 alcohol consumption in the analysis (10, 12, 16, 24, 25), no study adjusted for head  
33  
34  
35 injury. Furthermore, nutrition status including vitamin deficiency can also be relevant to  
36  
37  
38 the outcome of neuropsychological tests (16, 24). Thus, factors other than the common  
39  
40  
41 confounders that could negatively affect cognitive function should be adjusted for in the  
42  
43  
44 analysis.  
45  
46  
47  
48  
49

### 50 **Strengths and limitations of this review**

51  
52  
53 A major strength of this systematic review is that the characteristics of the selected  
54  
55  
56 studies were summarized using tables, and limitations of the exposure and outcome  
57  
58  
59  
60

1  
2  
3  
4  
5  
6 assessments used in these studies were identified mainly on the basis of the constructed  
7  
8  
9 tables. Furthermore, the systematic review allowed us to propose recommendations that  
10  
11  
12 will be useful for standardizing future epidemiological research.  
13

14  
15 All of the selected studies were relevant to occupational OPs exposure; however, some  
16  
17 of them included other pesticides such as carbamates, fungicides, and herbicides.  
18  
19 Pesticides that are commonly used in agriculture are usually mixtures of different  
20  
21 pesticides, which are used to increase their effect. Four of the 24 selected studies used a  
22  
23 combination of OPs, organochlorines, carbamates, and fungicide; hence, the effect of  
24  
25 only occupational OPs exposure could not be measured in these studies. In the outcome  
26  
27 assessments, different neurological types of tests were used, consequently, the lack of  
28  
29 pooling evidence meant that a meta-analysis could not be performed. Furthermore, the  
30  
31 exclusion of studies written in languages other than English is another limitation of this  
32  
33 review.  
34  
35  
36  
37  
38  
39  
40  
41  
42  
43  
44  
45

## 46 **CONCLUSION**

47  
48  
49 The items tested in the neurological or neuropsychological test batteries, and the  
50  
51 estimates of OPs exposure were inconsistent because they depended on the preferences  
52  
53 of the investigators. For future studies, the neurological and neuropsychological test  
54  
55  
56  
57  
58  
59  
60

1  
2  
3  
4  
5  
6 types, test batteries, and the methods used to measure OPs should be standardized to  
7  
8  
9 ensure adequate quality and to make it possible to pool the evidence from a large  
10  
11  
12 number of studies for future analysis.  
13

## 14 15 16 17 18 **ACKNOWLEDGMENT**

19  
20 We thank Professor Ben Armstrong for his insightful comments on our paper.  
21  
22  
23

## 24 25 26 **FOOTNOTES**

27  
28  
29 **Contributors** NT conceived the study design and participated in protocol development,  
30  
31 literature searching, data extraction, data analysis, and drafted the manuscript. MH  
32  
33 critically reviewed the draft and contributed to the manuscript revisions.  
34  
35

36  
37  
38 **Funding** No specific grant was obtained from any public funding agency for this  
39  
40 research.  
41  
42

43  
44 **Competing interests** None.  
45

46  
47 **Ethical approval** Systematic review.  
48

49  
50 **Provenance and peer review** Not commissioned, externally peer reviewed.  
51

52  
53 **Data sharing statement** No additional data are available.  
54  
55  
56  
57  
58  
59  
60



## FIGURE LEGEND

Figure 1: Flow diagram of search and review process

## REFERENCES

1. Steenland K, Jenkins B, Ames RG, et al. Chronic neurological sequelae to organophosphate pesticide poisoning. *American journal of public health*. 1994;84(5):731-6. Epub 1994/05/01.
2. Moretto A, Lotti M. Poisoning by organophosphorus insecticides and sensory neuropathy. *Journal of neurology, neurosurgery, and psychiatry*. 1998;64(4):463-8. Epub 1998/05/12.
3. Rohlman DS, Arcury TA, Quandt SA, et al. Neurobehavioral performance in preschool children from agricultural and non-agricultural communities in Oregon and North Carolina. *Neurotoxicology*. 2005;26(4):589-98. Epub 2005/08/23.
4. Rastogi SK, Tripathi S, Ravishanker D. A study of neurologic symptoms on exposure to organophosphate pesticides in the children of agricultural workers. *Indian journal of occupational and environmental medicine*. 2010;14(2):54-7. Epub 2010/12/02.
5. Recio-Vega R, Ocampo-Gomez G, Borja-Aburto VH, et al. Organophosphorus pesticide exposure decreases sperm quality: association between sperm parameters and urinary pesticide levels. *J Appl Toxicol*. 2008;28(5):674-80. Epub 2007/11/30.
6. Yucra S, Gasco M, Rubio J, et al. Semen quality in Peruvian pesticide applicators: association between urinary organophosphate metabolites and semen parameters. *Environ Health-Glob*. 2008;7:-.
7. Yucra S, Rubio J, Gasco M, et al. Semen quality and reproductive sex hormone levels in Peruvian pesticide sprayers. *Int J Occup Env Heal*. 2006;12(4):355-61.
8. Ovid Technologies I. Ovid SP. (access date: 2014 23 April) Available from: <http://gateway.ovid.com/>.
9. Albers JW, Berent S, Garabrant DH, et al. The effects of occupational exposure to chlorpyrifos on the neurologic examination of central nervous system function: a prospective cohort study. *J Occup Environ Med*. 2004;46(4):367-78. Epub 2004/04/13.
10. Beseler C, Stallones L, Hoppin JA, et al. Depression and pesticide exposures in female spouses of licensed pesticide applicators in the agricultural health study cohort. *J Occup Environ Med*. 2006;48(10):1005-13. Epub 2006/10/13.
11. Cole DC, Carpio F, Julian J, et al. Neurobehavioral outcomes among farm and

- 1  
2  
3  
4  
5 nonfarm rural Ecuadorians. *Neurotoxicology and Teratology*. 1997;19(4):277-86.
- 6  
7 12. Daniell W, Barnhart S, Demers P, et al. Neuropsychological Performance among  
8 Agricultural Pesticide Applicators. *Environ Res*. 1992;59(1):217-28.
- 9  
10 13. Dassanayake T, Gawarammana IB, Weerasinghe V, et al. Auditory event-related  
11 potential changes in chronic occupational exposure to organophosphate pesticides. *Clin*  
12 *Neurophysiol*. 2009;120(9):1693-8. Epub 2009/08/18.
- 13  
14 14. Farahat TM, Abdelrasoul GM, Amr MM, et al. Neurobehavioural effects among  
15 workers occupationally exposed to organophosphorous pesticides. *Occup Environ Med*.  
16 2003;60(4):279-86.
- 17  
18 15. Fiedler N, Kipen H, KellyMcNeil K, et al. Long-term use of organophosphates and  
19 neuropsychological performance. *Am J Ind Med*. 1997;32(5):487-96.
- 20  
21 16. London L, Myers JE, Nell V, et al. An investigation into neurologic and  
22 neurobehavioral effects of long-term agrichemical use among deciduous fruit farm workers  
23 in the Western Cape, South Africa. *Environ Res*. 1997;73(1-2):132-45.
- 24  
25 17. Mackenzie Ross SJ, Brewin CR, Curran HV, et al. Neuropsychological and  
26 psychiatric functioning in sheep farmers exposed to low levels of organophosphate pesticides.  
27 *Neurotoxicol Teratol*. 2010;32(4):452-9. Epub 2010/03/17.
- 28  
29 18. Roldan-Tapia L, Parron T, Sanchez-Santed F. Neuropsychological effects of  
30 long-term exposure to organophosphate pesticides. *Neurotoxicol Teratol*. 2005;27(2):259-66.  
31 Epub 2005/03/01.
- 32  
33 19. Stephens R, Spurgeon A, Calvert IA, et al. Neuropsychological effects of long-term  
34 exposure to organophosphates in sheep dip. *Lancet*. 1995;345(8958):1135-9. Epub  
35 1995/05/06.
- 36  
37 20. Stephens R, Sreenivasan B. Neuropsychological effects of long-term low-level  
38 organophosphate exposure in orchard sprayers in England. *Arch Environ Health*.  
39 2004;59(11):566-74.
- 40  
41 21. Bazylewicz-Walczak B, Majczakowa W, Szymczak M. Behavioral effects of  
42 occupational exposure to organophosphorous pesticides in female greenhouse planting  
43 workers. *Neurotoxicology*. 1999;20(5):819-26.
- 44  
45 22. Korsak RJ, Sato MM. Effects of chronic organophosphate pesticide exposure on the  
46 central nervous system. *Clin Toxicol*. 1977;11(1):83-95. Epub 1977/01/01.
- 47  
48 23. Levin HS, Rodnitzky RL, Mick DL. Anxiety associated with exposure to  
49 organophosphate compounds. *Arch Gen Psychiatry*. 1976;33(2):225-8. Epub 1976/02/01.
- 50  
51 24. London L, Nell V, Thompson ML, et al. Effects of long-term organophosphate  
52 exposures on neurological symptoms, vibration sense and tremor among South African farm  
53 workers. *Scand J Work Env Hea*. 1998;24(1):18-29.
- 54  
55  
56  
57  
58  
59  
60

- 1  
2  
3  
4  
5  
6  
7  
8  
9  
10  
11  
12  
13  
14  
15  
16  
17  
18  
19  
20  
21  
22  
23  
24  
25  
26  
27  
28  
29  
30  
31  
32  
33  
34  
35  
36  
37  
38  
39  
40  
41  
42  
43  
44  
45  
46  
47  
48  
49  
50  
51  
52  
53  
54  
55  
56  
57  
58  
59  
60
25. Maizlish N, Schenker M, Weisskopf C, et al. A behavioral evaluation of pest control workers with short-term, low-level exposure to the organophosphate diazinon. *Am J Ind Med.* 1987;12(2):153-72. Epub 1987/01/01.
  26. Misra UK, Nag D, Bhushan V, et al. Clinical and biochemical changes in chronically exposed organophosphate workers. *Toxicol Lett.* 1985;24(2-3):187-93. Epub 1985/02/01.
  27. Ohayo-Mitoko GJ, Kromhout H, Simwa JM, et al. Self reported symptoms and inhibition of acetylcholinesterase activity among Kenyan agricultural workers. *Occup Environ Med.* 2000;57(3):195-200. Epub 2000/05/16.
  28. Rodnitzky RL. Occupational exposure to organophosphate pesticides: a neurobehavioral study. *Arch Environ Health.* 1975;30(2):98-103. Epub 1975/02/01.
  29. Srivastava AK, Gupta BN, Bihari V, et al. Clinical, biochemical and neurobehavioural studies of workers engaged in the manufacture of quinalphos. *Food Chem Toxicol.* 2000;38(1):65-9.
  30. Steenland K, Dick RB, Howell RJ, et al. Neurologic function among termiticide applicators exposed to chlorpyrifos. *Environ Health Persp.* 2000;108(4):293-300.
  31. Stephens R, Spurgeon A, Berry H. Organophosphates: the relationship between chronic and acute exposure effects. *Neurotoxicology and teratology.* 1996;18(4):449-53.
  32. Rothlein J, Rohlman D, Lasarev M, et al. Organophosphate pesticide exposure and neurobehavioral performance in agricultural and non-agricultural Hispanic workers. *Environ Health Perspect.* 2006;114(5):691-6. Epub 2006/05/06.
  33. Institute OHR. The Newcastle-Ottawa Scale (NOS) for assessing the quality of nonrandomised studies in meta-analyses. (access date: 2014 26 April) Available from: [http://www.ohri.ca/programs/clinical\\_epidemiology/oxford.asp](http://www.ohri.ca/programs/clinical_epidemiology/oxford.asp).
  34. Wechsler D. Manual for the Wechsler Adult Intelligence Scale. New York: Psychological corporation; 1955: pp1- 110.
  35. Wechsler D. Manual for the Wechsler Adult Intelligence Scale-Revised. New York: Psychological corporation; 1981: pp1-156.
  36. Baker EL, Letz RE, Fidler AT, et al. A computer-based neurobehavioral evaluation system for occupational and environmental epidemiology: methodology and validation studies. *Neurobehavioral toxicology and teratology.* 1985;7(4):369-77. Epub 1985/07/01.
  37. B.L. Johnson ME, C. Xintaras, E.L. Baker, et al. Seppalainen. Prevention of neurotoxic illness in working populations. London: John Willey & Sons; 1987: pp1-274.
  38. Anger WK. Neurobehavioural tests and systems to assess neurotoxic exposures in the workplace and community. *Occup Environ Med.* 2003;60(7):531-8, 474. Epub 2003/06/24.
  39. Ngowi AV, Maeda DN, Partanen TJ, et al. Acute health effects of organophosphorus

1  
2  
3  
4  
5 pesticides on Tanzanian small-scale coffee growers. *J Expo Anal Environ Epidemiol*.  
6 2001;11(4):335-9. Epub 2001/09/26.

7  
8 40. Higgins JP, Thompson SG, Deeks JJ, et al. Measuring inconsistency in  
9 meta-analyses. *BMJ*. 2003;327(7414):557-60. Epub 2003/09/06.

10  
11 41. Gomes J, Lloyd O, Revitt MD, et al. Morbidity among farm workers in a desert  
12 country in relation to long-term exposure to pesticides. *Scand J Work Env Hea*.  
13 1998;24(3):213-9.  
14  
15  
16  
17  
18  
19  
20  
21  
22  
23  
24  
25  
26  
27  
28  
29  
30  
31  
32  
33  
34  
35  
36  
37  
38  
39  
40  
41  
42  
43  
44  
45  
46  
47  
48  
49  
50  
51  
52  
53  
54  
55  
56  
57  
58  
59  
60

1  
2  
3  
4  
5  
6  
7  
8 Title: A systematic review of the influence of occupational organophosphate pesticides exposure on  
9  
10 neurologic impairment

Formatted: No underline

11  
12 Authors:

Formatted: No underline

13  
14  
15 Noriko Takahashi<sup>+</sup>

16  
17 Masahiro Hashizume<sup>+</sup>

18  
19  
20 Authors' Institutions:

21  
22  
23 <sup>+</sup>Department of Pediatric Infectious Diseases, Institute of Tropical Medicine, Nagasaki University,  
24  
25 1-12-4 Sakamoto, ~~Nagasaki City~~, Nagasaki, 852-8523, Japan

26  
27  
28 Address for correspondence:

Formatted: No underline

29  
30 Noriko ~~Takahashi~~~~Furuoya~~

31  
32 Department of Pediatric Infectious Diseases, Institute of Tropical Medicine, Nagasaki University

33  
34 1-12-4 Sakamoto, ~~Nagasaki City~~, Nagasaki 852-8523, Japan

35  
36  
37 Tel: (+81) 95 819 7764 Fax: (+81) 95 819 7844

38  
39  
40 E-mail: [pediatric.nagasaki@furuoyanoriko@gmail.com](mailto:pediatric.nagasaki@furuoyanoriko@gmail.com)

41  
42 Key words: Organophosphate, Pesticides, Central Nervous System, Neurologic, Impairment

43  
44  
45 Word count, main text: 41~~7323~~

46  
47 Number of Tables/Illustrations: ~~434~~

48  
49  
50 Number of References: ~~413478~~

**ABSTRACT**

**Background:** ~~Organophosphate pesticides (OPs) are widely used widely; however, only a few epidemiological studies have investigated the association between neurological behavioral or neuropsychological effects and occupational OP exposure.~~

**Objective:** The aim of this study was to conduct a systematic review ~~of the~~ published literatures and to estimate whether or not there is a causal relationship between occupational exposure to Organophosphate pesticides (OPs) and either neurologic impairment or depressive symptoms.

**Data sources:** EMBASE, MEDLINE, Global Health, and PsycINFO (1980 to April 2014).

**Setting:** Observational studies (cross-sectional, cohort, and case-control studies) with both exposed and unexposed groups.

**Participants:** People who occupationally use OPs more than one month and their family.

**Primary outcome:** Results of neurological core test batteries or depressive symptoms such as headaches, anxiety, and dizziness.

**Study appraisal and synthesis methods****Method:** After Aan extensive search of various literature databases, one author screened titles and abstracts, searched the relevant publications manually, and conducted data extraction. ~~was conducted, and the relevant publications were then manually searched manually.~~ All the relevant data ~~were~~ extracted data from the selected articles wereand synthesized for analysis. Quality appraisal was conducted using Newcastle Ottawa Scale.

~~Meta-analysis was implemented using mean scores of the neurologic tests and depressive symptoms.~~

Formatted: Font: Bold

Formatted: Font: Bold

Formatted: Font: Bold

1  
2  
3  
4  
5  
6  
7  
8 **Results:** Of the 1024 articles retrieved by database search, 24~~Twenty three~~ studies that met inclusion  
9 and exclusion criteria were selected for analysis. Of the selected studies, 17~~6~~ were cross-sectional  
10 and the remaining seven were cohort and nested case-control studies. The geographical areas  
11 included in the studies were USA (10~~nine~~ studies), UK (four studies), Africa (four studies), Asia  
12 (three studies), Europe (two studies), and ~~one in~~ South America (one study). ~~E~~~~The~~ ~~Each~~ ~~of~~ ~~the~~  
13 ~~included~~ ~~studies~~ ~~sy~~ used different exposure and outcome assessments such as neurologic scores and  
14 depressive symptoms, ~~thus~~-making it difficult to compare the results exactly. ~~The~~ ~~n~~~~Most~~ ~~studies~~  
15 showed that ~~the~~ exposed groups had poorer results than ~~the~~ unexposed groups; ~~;~~ however, because of  
16 inconsistent neurological test batteries there was not enough pooling evidence to conduct a  
17 meta-analysis~~evidence based on the results of the meta-analysis was weak.~~

18  
19  
20  
21  
22  
23  
24  
25  
26  
27  
28  
29  
30  
31  
32 **Conclusion:** The findings of this literature review indicate that there~~it is a necessary~~~~necessity~~ to  
33 standardize the neurological~~behavioral~~ or neuropsychological test battery and methods of measuring  
34 OPs exposure to OPs.

35  
36  
37  
38  
39  
40 **Trial registration:** Not applicable.

Formatted: Font: Bold

1  
2  
3  
4  
5  
6  
7  
8 ~~there might be a causal relationship between occupational exposure to OPs and neurological~~  
9 ~~impairment or depressive symptoms.~~  
10  
11  
12  
13

## 14 15 ARTICLE SUMMARY

### 16 17 Article Focus

- 18 ● To systematically review epidemiological studies ~~that~~which examine adverse effects on the  
19  
20 human central nervous system (CNS) by exposure to organophosphate pesticides (OPs).  
21  
22  
23  
24

### 25 Key messages

- 26 ● OPs have been ~~widely~~ used widely all over the world for agricultural or industrial use.  
27  
28 ● ~~Many There are a plenty of~~ studies ~~have~~which have examined acute health problems caused by  
29  
30  
31  
32 OPs; however, few studies have investigated negative effects caused by occupational OPs  
33  
34 exposure.  
35  
36

### 37 Strengths and limitations of this study

- 38 ● The article represents a systematic review of epidemiological studies on adverse effects on the  
39  
40 human ~~central nervous system~~CNS by occupational OPs exposure, with a quality appraisal of  
41  
42 each study.  
43  
44 ● The article identifies problematic issues of exposure and outcome assessments.  
45  
46 ● ~~M~~The meta-analysis was limited because each study used various outcome assessments could not  
47  
48  
49  
50 be applied due to because only a small number of the pooled studies were available.  
51  
52  
53  
54



1  
2  
3  
4  
5  
6  
7  
8  
9  
10  
11  
12  
13  
14  
15  
16  
17  
18  
19  
20  
21  
22  
23  
24  
25  
26  
27  
28  
29  
30  
31  
32  
33  
34  
35  
36  
37  
38  
39  
40  
41  
42  
43  
44  
45  
46  
47  
48  
49  
50  
51  
52  
53  
54  
55  
56  
57  
58  
59  
60

- ~~In some studies. There it is was a~~ difficulty to judge negative effects ~~caused by~~ only ~~by~~ OPs, because mixed pesticides were used ~~in some studies.~~

For peer review only

## INTRODUCTION

Ever since organophosphate pesticides (OPs) were developed, they have been used ~~to~~for combating insects for public health purposes and to support agricultural productivity and manufacturing processes. ~~Since~~Because Pesticides are also ~~well-known as~~ one of the leading suicide methods, ~~and approximately three million cases of pesticide poisoning occur every year around the world. This is especially prevalent in Asian nations including Sri Lanka, China, and Malaysia (1). For this reason,~~ a large number of epidemiological studies have investigated the relationship between high level OPs exposure such as pesticide poisoning and accidents and acute health effects~~(1, 2), and~~ ~~it~~ has been reported that high level OPs exposure is significantly related to neurological or neuropsychological impairment~~(1, 2)~~~~((1, 2)2, 3)~~. In contrast, few studies~~that~~ have ~~report~~investigated associations between occupational or cumulative OPs exposure and negative effects on human health~~are~~ ~~available, even although.~~ ~~Although~~ some research has examined the negative influence ~~on~~to young children ~~of~~by cumulative OPs exposure (3, 4)~~((3, 4)4, 5)~~ ~~and~~ others have investigated relationships between reproductive health and occupational OPs exposure~~(5-7)~~~~((5-7)6-8)~~; ~~Since~~ ~~h~~High levels OPs exposure ~~provides~~are known to have adverse effects on the human CNS~~central nervous system~~, ~~therefore, occupational or cumulative OPs exposure~~ ~~has~~ also has the potential to negatively affect the CNS~~it~~. However, ~~there are~~ very few epidemiological studies ~~that~~which have assessed the relationships between occupational OPs exposure and neurologic or mental problems have been published~~using epidemiological research~~. The objective of this systematic review is to verify

1  
2  
3  
4  
5  
6  
7  
8 ~~whether or not occupational OPs exposure could negatively affects influence on the human central~~  
9 ~~nervous system CNS. In this systematic review~~ To investigate this further ~~test the hypothesis, we~~  
10 ~~summarized~~ the epidemiological evidence for the relationship between occupational OPs exposure  
11 and mental and neuropsychological aggression, ~~especially for occupational OP users, is summarized,~~  
12 ~~and and~~ some of the limitations associated with the ~~various~~ studies ~~are~~ discussed.  
13  
14  
15  
16  
17  
18  
19

## 20 21 22 23 MATERIALS AND METHODS

### 24 25 Searching strategy for identification of published studies

26  
27  
28  
29  
30 ~~A~~ We searched ~~the published literature for observational studies was carried out using the Ovid~~  
31 ~~SP(8), a search software (8) to select relevant observational studies, by the author. A~~ geographical  
32 ~~and time~~ restrictions ~~were~~ was not imposed; ~~however, the search a published period was restricted to~~  
33 ~~studies published from 1980 to 2014~~ Current. Population-based case-control studies were excluded  
34 from the systematic review because it ~~was~~ is difficult to assess accurate exposure doses ~~for these~~  
35 ~~studies. Because~~ Currently, various pesticides including OPs, ~~currently~~ are ~~currently~~ easily ~~available~~  
36 ~~to~~ for everyone, ~~and some people have ait is possibility~~ highly likely that ~~of using these~~ pesticides  
37 ~~have been obtained~~ for personal use. ~~However~~ For this reason, it is almost impossible to ~~comprehend~~  
38 ~~exactly~~ obtain past records of pesticides use ~~by every person individual~~. The ~~literature~~ search was  
39 limited to studies in humans and to reports published in English, and the review was limited to  
40  
41  
42  
43  
44  
45  
46  
47  
48  
49  
50  
51  
52  
53  
54

epidemiological studies. ~~Moreover, unpublished studies and grey literature (literature that has not been formally published)s~~ were not searched in this systematic review; ~~therefore we did not make a contact with any authors to find out unpublished studies.~~ Studies investigating OP<sub>s</sub> exposure through food and water contamination were also excluded. A search of the following four databases was carried out:

1. ~~EMBASE Classic~~ ~~plus~~ EMBASE (1980~~47~~ to ~~201~~Week13 20140 July 09);~~;~~
2. ~~Ovid MEDLINE(R)~~ (1985~~0~~ to ~~June~~ Week 5 2010~~March~~ Week 13 4 2014);~~;~~
3. ~~Global Health~~ (1980~~10~~ to ~~June~~ 2010~~Week~~12 2014);~~;~~ and
4. ~~PsycINFO~~ (1980~~806~~ to ~~July~~ Week 1 2010~~April~~ Week 14 2014).

Formatted: Indent: First line: 0.5 ch

—A combination of free-text terms and explore terms was used to identify relevant articles. For exposure, the following search keywords were used: organophosphate\*, organophosphorous, pesticide\*, ~~or~~ insecticide\*, ~~and~~ organophosphate pesticide (explore map term); ~~pesticide (explore map term)~~.—For outcome, the following search keywords were used: neuro\*, psychiatr\*, psycholog\*, mental health, mental illness, mental disorder, ~~or~~ depressi\*, depression ~~(Epidemiology)~~ (explore map term), and mental health (explore map term). For subjects, the following search keywords were used: occupation\*, agricultu\*, or farm\*. For study design, the following search keywords were used: epidemiolog\*, cohort, ~~or~~ cross-sectional, ~~or~~ case-control, ~~and~~ ~~E~~epidemiology (explore map term) ~~were used as keywords~~. An initial systematic search in the titles and abstracts was conducted using a combination of all these search terms. A second manual search of the

1  
2  
3  
4  
5  
6  
7  
8 reference lists from the selected relevant articles was performed to explore or retrieve articles found  
9  
10 in the initial search in order to find out as many available studies to the extent as possible.  
11  
12

### 13 14 15 **Criteria for selecting studies for ~~the~~ review** 16

17 Only original research articles meeting the inclusion and exclusion criteria described below were  
18  
19 used in the final review~~result~~.  
20  
21  
22

#### 23 24 25 Inclusion criteria: 26

##### 27 28 1. ~~Study design:~~ 29

- 30 a) Must be observational studies: cross-sectional, cohort, and case-control studies.  
31  
32 b) Studies must have both exposed and unexposed groups.  
33

##### 34 35 2. ~~Subjects:~~ 36

- 37 a) The subjects in the exposed group either must use OPs occupationally, or there must be a  
38 probability of being exposed to OPs during their work.  
39  
40 b) The families of occupational OP users can be treated as subjects.  
41  
42  
43

##### 44 45 3. ~~Exposure:~~ 46

- 47 a) Subjects must be exposed to OPs for at least one month.  
48  
49 b) Seasonal workers who used OPs for more than one month must be included.  
50  
51

##### 52 53 4. ~~Outcome:~~ 54

1  
2  
3  
4  
5  
6  
7  
8 Studies must have carried out some tests to assess damage ~~to~~of the CNS (~~Central Nervous System~~)  
9  
10 or have conducted a survey or an interview to identify depressive symptoms.

11  
12  
13 5. ~~-~~Exposure-outcome association

14  
15 Results must be reported as some ~~type~~s of relative risks or mean scores.  
16  
17

18  
19  
20 Exclusion criteria:

21  
22 1. Study design

23  
24 Experimental and laboratory based studies including animal studies were excluded.  
25  
26

27 Population-based case-control studies were excluded.  
28  
29

30 2. Subjects

31  
32 Studies of mainly patients of pesticide poisoning were ~~not~~ excluded.  
33  
34

35 3. Exposure

36  
37 Studies ~~that~~which did not specify the type of pesticides were excluded.  
38  
39

40 4. Outcome

41  
42 Studies examining damage of the peripheral nervous system due to OPs exposure were excluded.  
43  
44

45 5. Language

46  
47 Studies published in a language other than English were excluded.  
48  
49  
50

51  
52 **Definitions used for the review**  
53  
54

Formatted: Font: Bold, Italic

***Definition of cumulative exposure***

a) People who used OPs in their jobs for at least one month and had the probability of inhaling ambient OPs and absorbing OPs by spraying and touching.

b) Families of OP users were included as subjects, because they may have been exposed to OPs by washing clothes contaminated by OPs and/or by touching OP users.

Formatted: Font: Bold, Italic

***Definition of poor mental health***

A) Neurological or neuropsychological impairment

a) People who had poorer results in neurological or neuropsychological test batteries than healthy people of the same age.

b) People who had short-memory loss; for example, people who had experienced memory loss of six to three months duration.

B) Depressive Symptom

c) People who, regardless of their age, had chronic depressive symptoms including headache, fatigue, dizziness, sleepless, and eye problems.

d) People who were diagnosed with depression by clinical doctors.

**Study selection process**

Using the search terms listed above, a total of [1024592](#) references were obtained: [515276](#) from [EMBASE](#) Classic + [EMBASE](#), [3146](#) from [PsycINFO](#), [196133](#) from [Global Health](#), and

1  
2  
3  
4  
5  
6  
7  
8 ~~282167~~ from ~~Ovid MEDLINE(R)edline (Figure1)~~. However, ~~77 animal studies, were excluded~~  
9  
10 ~~because they were not appropriate to test the hypothesis of this review. Furthermore, 90 studies~~  
11 ~~were not in English studies, and 12 studies that did not meet were removed due to the time~~  
12 ~~restrictions were excluded. Of the remaining 845 studies, 516197 of 845592 references were~~  
13 ~~excluded due to because of -duplicationses. Of these 395 unique references that remained, 63 were~~  
14 ~~not in English, and 32 were animal studies.~~ A manual search of the titles and abstracts of the  
15 remaining 32900 references excluded a further 272268 studies. The 2132 remaining articles were  
16 fully reviewed, after which 132 studies were deemed to meet inclusion and exclusion criteria (9-20)  
17 (8-20)(8-20)9-21). In addition, 120 articles identified by the manual search were added to the  
18 systematic review (Figure1See Appendix A for flow of study inclusion and exclusion diagram). To  
19 include as many relevant studies as possible, studies published before 1980 that were found by the  
20 manual search were included to the list for review. Finally, these 243 studies were identifiedselected  
21 and used for data extraction (9-32)(21)(8-31), ((8, 11, 13, 15, 19, 21-38)22-31).

### 42 Data extraction, synthesis, and analysis

43  
44 Data extraction forms were created to compare relevant data collected from each of the 243 studies.  
45  
46 The following data ~~were~~ extracted to assess heterogeneity of the included studies ~~as basic~~  
47 ~~data.~~ Extracted data included title, authors, year published, ~~and the~~ number of subjects in the  
48 exposed and unexposed groups, occupation, and demographic information such as mean age, sex,  
49  
50  
51  
52  
53



1  
2  
3  
4  
5  
6  
7  
8 smoking status, and geographical area. In addition to basic data, the following data were extracted  
9  
10 to assess confounding factors and statistical models among the included studies: inclusion and  
11  
12 exclusion criteria such as first language, alcohol consumption, ~~and~~ injury experience, confounding  
13  
14 factors, and statistical methods used. The following data were extracted to assess exposure and  
15  
16 outcomes assessment: types of pesticides, exposure assessment, and ~~statistical methods,~~ outcome  
17  
18 assessment to measure the neurologic or neuropsychological ability, and results obtained. Tables  
19  
20 containing the data that ~~were~~ obtained using the data extraction forms were constructed ~~and~~  
21  
22 analyzed. ~~P-values and 95% percent~~ confidence intervals (95% CIs) were elicited from the articles  
23  
24 to judge statistical uncertainty. When a study had investigated depressive symptoms, the information  
25  
26 was collected and a table was constructed. Impact and statistical magnitude of depressive symptoms  
27  
28 were represented using plus or minus signs including ‘++’, ‘+’, and ‘-’, based on the P-value or  
29  
30 95% CI of the studies. Meta-analysis was carried out using mean scores of neuropsychological tests  
31  
32 with STATA version 11.0. All data extraction, coding, and quality appraisal were conducted only by  
33  
34 only by the first author; therefore, no events in disagreement events were not occurred.  
35  
36  
37  
38  
39  
40  
41  
42  
43  
44

#### 45 Quality appraisal

46  
47 The quality of the 243 studies was appraised using a scale ~~that was~~ adapted from the  
48  
49 ‘Newcastle/Ottawa Scale (NOS)’ (33) ~~(32)~~ (The appraisal standard of NOS ~~is~~ was shown in Appendix  
50  
51 A). Based on the NOS, each study was evaluated using the point system. When a study included  
52  
53  
54

1  
2  
3  
4  
5  
6  
7  
8 relevant information that could be associated to the NOS, one point was added. ~~F~~There are five items  
9  
10 in cross-sectional studies and eight items in cohort and case-control studies that ~~could~~ be related  
11  
12 to the NOS were identified. Therefore, cross-sectional studies assigned 5, 4, 3, or 0-2 points were  
13  
14 evaluated as very good, good, satisfactory, or unsatisfactory studies, respectively. Similarly,  
15  
16 cohort/case-control studies with 7-8, 5-6, 4, and 0-3 points were identified as very good, good,  
17  
18 satisfactory, or unsatisfactory, respectively.  
19  
20  
21  
22  
23  
24

## 25 RESULTS

26  
27 As a result of the search strategy described in the Materials and Methods section, 123 studies were  
28  
29 identified from the database search and another 120 studies were found after a manual search. ~~A total~~  
30  
31 ~~of~~These 243 articles, published between 1975 and 2010, met all the inclusion and exclusion criteria.  
32  
33  
34

35 A summary of the characteristics of the 243 selected articles is shown in Table 1.  
36  
37  
38  
39

### 40 **Study design and geographical area-**

41  
42 Of the selected studies, 176 were cross-sectional and the remaining seven were cohort and nested  
43  
44 case-control studies. The geographical areas included in the studies were USA (~~10~~ nine studies), UK  
45  
46 (four studies), Africa (four studies; two in South Africa, one in Egypt, and one in Kenya), Asia (three  
47  
48 studies; two in India, and one in Sri Lanka), Europe (two studies; one in Spain and one in Poland),  
49  
50 and ~~one in~~ South America (one study; Ecuador, ~~one study~~).  
51  
52  
53  
54

### Characteristics of subjects

Because the subjects were limited to people who had the probability of being occupationally exposed by OPs, the majority of the participants (60–70%) were men. Most of the time, agricultural work such as pesticide application and farming is has been is predominantly performed predominantly by men. SixFive out of the 243 studies included both male and female subjects; however, approximately 60 to 70 percent of the subjects were male ((9, 11, 17, 25, 27, 32)9, 21, 27, 29, 33), and oOnly one study used all female subjects in both the exposed and control groups (21)(23). In 132 of the studies The mean age of the exposed subjects was in the thirtie30s in 12 studies, in six studies the mean age was in the 40forties ((9, 14, 15, 19, 20, 31)9, 12, 16, 17, 24, 34) and in two studies the mean age was in the fiftie50s ((13, 17)13, 21). The mean age in twoone studies was in the twenties, however, the mean age was 29, very close to thirty ((25, 32)27). One of the studiesy did not report detailed demographic data of the participants (40)(10).

### Source of recruitment and sample size

Ten out of the 243 studies were on pesticide applicators including private, commercial, and tree, fruit, and vegetable applicators. Fiveour and three studies were on farmers and sheep farmers, respectively, and; two studies were on factory workers and greenhouse workers. One study investigated depressive symptoms in the spouses of OPs users. In the study by Korsak et al. (22), the

1  
2  
3  
4  
5  
6  
7  
8 specific occupation of the population in the study was not stated, however, the subjects had  
9  
10 experienced occupational OPs exposure ~~—(25(21))~~. The number of subjects in the exposed groups  
11  
12 varied from 16 to 2,051, while the control groups had a wider range ~~of subjects, with the figure~~  
13  
14 ~~ranging from (16 to 27,023)~~.  
15  
16  
17  
18  
19  
20  
21  
22  
23  
24  
25  
26  
27  
28  
29  
30  
31  
32  
33  
34  
35  
36  
37  
38  
39  
40  
41  
42  
43  
44  
45  
46  
47  
48  
49  
50  
51  
52  
53  
54  
55  
56  
57  
58  
59  
60

1  
2  
3  
4  
5  
6  
7  
8  
9  
10  
11  
12  
13  
14  
15  
16  
17  
18  
19  
20  
21  
22  
23  
24  
25  
26  
27  
28  
29  
30  
31  
32  
33  
34  
35  
36  
37  
38  
39  
40  
41  
42  
43  
44  
45  
46  
47  
48  
49

Table 1 Reported findings reported in recent epidemiological studies regarding occupational low level OPs exposure and mental illness

| Author                              | Study Design | Country      | Exposed Population(No)                                                   | Chemical     | Exposed Assessment           | Comparison Group                                                              |
|-------------------------------------|--------------|--------------|--------------------------------------------------------------------------|--------------|------------------------------|-------------------------------------------------------------------------------|
| 1 Albers et al (9)(9)               | CO           | USA          | Chemical workers(53)                                                     | OP           | Industrial HR, AChE INH      | Similar workers, not exposed(60)                                              |
| 2 Bazylewicz-Walczak et al (21)(23) | CO           | Poland       | Greenhouse workers(26)                                                   | OP           | DR                           | Greenhouse workers, not exposed(25)                                           |
| 3 Beseler et al (10)(19)*           | NC/ CO       | USA          | Case** : Spouses of private applicators with depressive diagnoses(2,051) | OP           | QU or IN                     | Control: Spouses of private applicators without depressive diagnoses (27,023) |
| 4 Cole et al (11)(33)               | CR           | Ecuador      | Farmers, some applicators(144)                                           | OP, CAR, FNG | IN, OU, AChE INH             | Local Population(72)                                                          |
| 5 Daniell et al (12)(20)            | CO           | USA          | Farm worker applicators(49)                                              | OP           | QU, AChE INH                 | Slaughterhouse workers(40)                                                    |
| 6 Dassanayake et al (13)(43)        | CR           | Sri Lanka    | Vegetable farm workers (38)                                              | OP           | N.A.                         | hospital labours(35)                                                          |
| 7 Farahat et al (14)(24)            | CR           | Egypt        | Farm workers(52)                                                         | OP           | AChE INH                     | Local Population(50)                                                          |
| 8 Fiedler et al (15)(34)            | CR           | USA          | Tree fruit farmers (57)                                                  | OP           | QU, lifetime exposure metric | Cranbury/blueberry growers(low exposed), hardware storeowners(unexposed) (42) |
| 9 Korsak et al (22)(25)             | CR           | USA          | Occupational exposure(16)                                                | OP, OC       | CAR, AChE INH                | Local Population(low exposure)(16)                                            |
| 10 Levin et al (23)(26)*            | CR           | USA          | Pesticide applicators(24)                                                | OP           | IN, AChE INH                 | Farmers(24)                                                                   |
| 11 London et al (16)(48)            | CR           | South Africa | Fruit farm pesticide applicators(163)                                    | OP           | QU(job-matrix)               | Farm workers, not applicators(84)                                             |
| 12 London et                        | CR           | South Africa | Fruit farm pesticide applicators(164)                                    | OP           | QU(job-matrix)               | Farm workers, not applicators(83)                                             |

Formatted: Font: 7 pt

Formatted: Font: 7 pt

Formatted Table

Formatted: Font: 7 pt

1  
2  
3  
4  
5  
6  
7  
8  
9  
10  
11  
12  
13  
14  
15  
16  
17  
18  
19  
20  
21  
22  
23  
24  
25  
26  
27  
28  
29  
30  
31  
32  
33  
34  
35  
36  
37  
38  
39  
40  
41  
42  
43  
44  
45  
46  
47  
48  
49

|    |                          |    |       |                              |         |                |                                            |             |
|----|--------------------------|----|-------|------------------------------|---------|----------------|--------------------------------------------|-------------|
|    |                          |    |       |                              |         |                |                                            | al(24)(15)* |
| 13 | Maizlish et al           | CR | USA   | Pesticide applicators(46)    | OP      | UM, DR         | Non-applicators(56)                        | (25)(27)    |
| 14 | Misra et al              | PR | India | Pesticide applicators(22)    | OP      | AChE INH       | Hospital labours(20)                       | (26)(28)*   |
| 15 | Ohayo-Mitoko et al       | CO | Kenya | Farm worker applicators(256) | OP, CAR | AChE INH       | Farm workers(low exposure)(152)            | (27)(29)*   |
| 16 | Rodnitzky et al          | CR | USA   | Pesticide applicators(23)    | OP      | AChE INH       | Farmers(23)                                | (28)(30)    |
| 17 | Roldan-Tapia et al       | CR | Spain | Greenhouse workers(40)       | OP, CAR | QU, AChE INH   | Local Population(26)                       | (18)(14)    |
| 18 | Ross et al (17)(21)      | CO | UK    | Sheep farmers(127)           | OP      | IN             | Police workers(78)                         |             |
| 19 | Rothlein et al(32)       | CR | USA   | Farm workers(96)             | OP      | UM, House dust | Workers in hotels and tourist industry(45) |             |
| 20 | Srivastava et al(29)(31) | CR | India | Manufacture workers(59)      | OP      | AChE INH       | Manufacture workers, not exposed(17)       |             |
| 21 | Steenland et al(30)(11)  | CR | USA   | Termiticide applicators(191) | OP      | IN, UM         | Friends, blue collar workers(189)          |             |
| 22 | Stephens et al           | CR | UK    | Sheep farmers(146)           | OP      | QU             | Quarry workers(143)                        | (19)(12)    |
| 23 | Stephens et al           | CR | UK    | Sheep farmers(77)            | OP      | QU, UM         | Quarry workers(69)                         | (31)(17)    |
| 24 | Stephens et al           | CR | UK    | Orchard applicators(37)      | OP      | IN, QU         | Construction workers, pig farmers(57)      | (20)(16)    |

- Formatted ... [1]
- Formatted ... [2]
- Formatted ... [3]
- Formatted ... [4]
- Formatted ... [5]
- Formatted ... [6]
- Formatted ... [7]
- Formatted ... [8]
- Formatted Table ... [9]
- Formatted ... [10]
- Formatted ... [11]
- Formatted ... [12]
- Formatted ... [13]
- Formatted Table ... [14]
- Formatted ... [15]
- Formatted ... [16]
- Formatted Table ... [17]
- Formatted ... [18]
- Formatted ... [19]
- Formatted ... [20]
- Formatted ... [21]
- Formatted Table ... [23]
- Formatted ... [24]
- Formatted ... [25]
- Formatted ... [26]
- Formatted ... [27]
- Formatted ... [28]
- Formatted ... [29]

1  
2  
3  
4  
5  
6  
7  
8  
9  
10  
11  
12  
13  
14  
15  
16  
17  
18  
19  
20  
21  
22  
23  
24  
25  
26  
27  
28  
29  
30  
31  
32  
33  
34  
35  
36  
37  
38  
39  
40  
41  
42  
43  
44  
45  
46  
47  
48  
49

Study Design: CR: Cross-sectional, CO: Cohort, NC: Nested case-control, PR: Prospective study

Chemical: OP: Organophosphates, OC: Organochlorines, CAR: Carbamates, FUN: Fungicides, AChE: Acetylcholinesterase

Exposed Assessment: AChE INH: AChE inhibition, DR: Dermal and Respiratory Absorption, IN: Interview, QU: Questionnaire, HR: Hygiene Records, UM: Urinary metabolites

\*Articles Studies that including depressive symptoms for outcome assessments

\*\*Cases were defined as female spouses of private applicators who responded 'yes' to the question "Has a DOCTOR ever told you that you had been diagnosed with depression requiring medication?" Controls were female spouses who responded 'no' (10)

- Formatted: Font: 6 pt
- Formatted: Font: 6 pt, No underline
- Formatted: Font: 6 pt
- Formatted: Font: 6 pt
- Formatted: Font: 6 pt, No underline
- Formatted: Font: 6 pt

peer review only

## Exposure assessment

Exposure assessment in the included studies ~~could be~~ was divided, for the most part, into five patterns: indirect assessment using, for example, an interview or questionnaire; direct assessment including ~~at~~ the measurement of urinary metabolites and acetylcholinesterase (AChE) levels in the blood or ~~a~~ measurement of ambient OPs using a patch and a pump; ~~a~~ combination of direct and indirect methods; ~~a combination of a biomarker and OPs exposure levels included in house dust~~; and ~~a~~ combination of biomarkers and ambient OP levels. Seven ~~out~~ of the ~~24~~3 studies used indirect methods, and six studies used blood AChE inhibition levels to measure AChE levels in the blood as an exposure indicator. ~~Six~~ studies used a combination of indirect methods and biomarkers, ~~and~~ three studies used biomarkers and the ambient OP levels, one study used a biomarker and house dust. The remaining study did not mention any exposure assessment methods. In all the studies ~~that~~ which used urinary metabolites as exposure assessment, ~~the~~ results were presented as the sum of dialkylphosphates (DAP) (i.e. the sum of six DAP metabolites: DMP (dimethylphosphate), DMTP (dimethylthiophosphate), DMDTP (dimethyldithiophosphate), DEP (diethylphosphate), DETP (diethylthiophosphate), and DEDTP (diethyldithiophosphate)) (25, 30-32)(8).



### Outcome measurements

Two different outcome measurements were used in the studies; one measured neurological impairment and the other assessed depressive symptoms. Of the 243 studies, 198 used cognitive function tests to investigate negative neurologic influences caused by OPs exposure.

### Associations between outcome and exposure

Ten of the 198 studies that investigated cognitive impairment mentioned that at least one measure outcome showed more impairment in the exposed groups; however, these observations were not significant ( $P < 0.05$ ). Seven of the studies reported some significant positive associations of exposure with poor outcome ( $P < 0.05$ ); however, even in these cases, the significant decrements were observed only in some of the neurologic tests, mainly in the Digit Span and Santa Ana Dexterity tests. Indeed, there are several versions of these neurologic tests and the significance of the scores often depended on the versions of the tests that were used. Five studies used the Neurobehavioral Evaluation System (NES), five studies used the Wechsler Adult Intelligence Scale (WAIS or WAIS-R), four studies used the Neurobehavioral Evaluation System (NES), two studies used the World Health Organization

Neurobehavioral Core Test Battery (NCTB)<sub>(37, 38)</sub><sup>(37)</sup>, and the remaining eight four studies used their own scales.

Five studies adopted depressive symptoms as outcome measurements, as shown in ~~the~~ Table 2; however, the symptoms used in the studies were not standardized.

Table 2 ~~The~~ Summary table of depressive symptoms used as outcome measurements

| Reference                                      | <del>Obtained</del> Results <u>obtained</u>                                                                                                                                                                                                                                           | Impact of outcomes |
|------------------------------------------------|---------------------------------------------------------------------------------------------------------------------------------------------------------------------------------------------------------------------------------------------------------------------------------------|--------------------|
| Beseler et al<br>2006(10) <sup>(10)</sup>      | Depression due to doctor's diagnosis was not significantly related to low (OR 1.09; 95%CI 0.91, 1.31) or high (OR 1.09; 95%CI 0.91, 1.31) cumulative exposure.                                                                                                                        | -                  |
| Levin et al<br>1976(23) <sup>(26)</sup>        | Anxiety score of the pesticide applicators was significantly higher (P<0.05) than that of the farmers. However, there was no significant difference in measures of depression.                                                                                                        | ++                 |
| London et al<br>1998(24) <sup>(15)</sup>       | Dizziness, sleepiness, and headache <del>had</del> a significantly higher overall neurological symptom score (P<0.05).                                                                                                                                                                | ++                 |
| Misra et al<br>1985(26) <sup>(28)</sup>        | Common symptoms were Headache (59%), giddiness (50%), ocular symptoms (27%), and paresthesia (18%) and no neurologic change was seen.                                                                                                                                                 | -                  |
| Ohayo-Mitoko et al<br>2000(27) <sup>(29)</sup> | A significant change in symptom prevalence was found for <u>the</u> respiratory (2.48% CI (0.78, 5.38) and central nervous system (2.56% CI (0.99, 6.62), but in terms of skin <del>symptoms</del> <u>systemic</u> , and eye symptoms, there was no statistically significant change. | ++                 |

OR=Odds Ratio ++: Statistically significant (P<0.05), -: Not statistically significant

Formatted: Font: 8 pt  
Formatted: Indent: First line: 0.5 ch  
Formatted: Font: 8 pt

### Statistical analysis

Sixteen studies used logistic regression, and the remaining eight seven used other

1  
2  
3  
4  
5  
6  
7  
8  
9 statistical tests including  $X^2$ -test and t-test. Only one study adjusted for sex in the  
10  
11 logistic regression. ~~Fourteen~~<sup>Thirteen</sup> ~~out~~ of the ~~243~~ studies adjusted for age, and ~~124~~  
12  
13 adjusted for education in the ~~statistical analysis~~<sup>logistic regression</sup>. However, only five  
14  
15 studies adjusted for alcohol consumption before carrying out the statistical analysis,  
16  
17 and ~~Further~~, only two studies adjusted for first language.  
18  
19  
20  
21  
22  
23

#### 24 **Methodological quality appraisal**

25  
26 Based on NOS, ~~Five~~<sup>our</sup> ~~out~~ of the ~~243~~ studies were of very good quality, 10 were of  
27  
28 good quality, and the remaining nine were either satisfactory or unsatisfactory. Most ~~of~~  
29  
30 ~~the bad quality~~ studies with unsatisfactory scores<sup>quality</sup> either were carried out before  
31  
32 1990 or were performed in some of the less developed countries. In particular, the  
33  
34 methods of recruitment of subjects, controlling for confounders, and outcome  
35  
36 assessment were not appropriate. For example, in some ~~of the~~ studies, all of the  
37  
38 participants were volunteers ((14, 28)~~24, 30~~) and in another study, the subjects were not  
39  
40 representative of the community from which they were recruited (factory workers)  
41  
42 (29)~~(31)~~. In addition, in the unsatisfactory studies, how the outcome was assessed was  
43  
44 not described ~~in the unsatisfactory studies~~, and ~~some of the~~ methods needed to avoid  
45  
46 confounders such as stratification and regression were not used. ~~On the other hand~~,  
47  
48  
49  
50  
51  
52  
53  
54

1  
2  
3  
4  
5  
6  
7  
8  
9 ~~None~~ of the cohort studies were assessed as very good quality because most of them  
10  
11 did not have a long enough follow-up duration (in five studies, the duration was less  
12  
13 than six months) and the selected subjects were not fully representative of the target  
14  
15 community. Moreover, the methods of outcome assessment were not described in most  
16  
17 of the cohort studies.  
18  
19  
20

#### 21 22 23 **Data synthesis ~~and meta-analysis~~**

24  
25 ~~As shown in Figure 1 and 2, a meta-analysis was carried out using the reported mean~~  
26  
27 ~~scores for the implemented neurobehavioral test; however, because the investigators~~  
28  
29 ~~used different scoring systems, meta-analysis was difficult. The results of the~~  
30  
31 ~~neurologic tests used in the studies are~~ summarized in Table3. As can be seen ~~in the~~  
32  
33 ~~Table3, the test batteries differed from each study to study.~~ The commonly used tests  
34  
35 ~~batteries~~ in NCTB, NES, and WAIS were Symbol-Digit and Digit Span Forward and  
36  
37 Backward. However, some studies that adopted NES and WAIS to measure neurologic  
38  
39 impairment (~~Table3~~) implemented only a few subsets in the trials. Among ~~the 13~~ five  
40  
41 studies ~~that used~~ a Symbol-Digit test, ~~each four~~ three used NES and ~~unknown tests,~~  
42  
43 ~~each WAIS,~~ two used ~~WAIS and~~ WAIS-R ~~and unknown tests,~~ and one ~~was used~~ a Polish  
44  
45 NCTB. ~~For~~ Among the ~~studies that used~~ Digit Span, ~~there were~~ ~~f~~ Forward and  
46  
47  
48  
49  
50  
51  
52  
53  
54

1  
2  
3  
4  
5  
6  
7  
8  
9 ~~Backward tests, some studies performed both tests, but while the others did either only~~  
10 ~~one of the tests as shown in Table 3. test, two studies used NES and WAIS in the forward~~  
11 ~~tests and two WAIS in the backward tests. Overall, As a result, there were only four of~~  
12 ~~the studies that used the same test battery in NES and WAIS, respectively, and it was~~  
13 ~~impossible to perform a meta-analysis for neurological test batteries. Because there~~  
14 ~~were only two studies in each Digit Span test, a meta-analysis would not be very useful,~~  
15 ~~and so a meta-analysis for the Digit Span tests was not carried out and only a~~  
16 ~~meta-analysis for NES and WAIS Symbol Digit tests was performed. In terms of~~  
17 ~~Symbol Digit (NES), slight positive association can be seen (Figure 1), while Figure 2~~  
18 ~~showed that there was no difference in mean score of Symbol Digit WAIS between the~~  
19 ~~exposed and control groups. Although the three studies apparently used the same~~  
20 ~~scoring systems, one of the scores was completely different from the scores in the other~~  
21 ~~two studies. For example, the scores in the study by Stephens et al. (31) were 24.22~~  
22 ~~and 21.01 in the exposed and the control groups, respectively (30)(17), whereas the~~  
23 ~~scores reported by Daniell et al. and Stephens et al. were much lower and between~~  
24 ~~2.23 and 3.55 (12, 20, 31)(16, 17, 20). Similarly, the mean scores reported by~~  
25 ~~Bazylewicz-Walczak et al. (215) were higher, 45.50 and 49.40, while the mean scores~~  
26 ~~reported in the other studies were smaller, 2.28 and 2.23 in the WAIS (25)(24)(27). In~~

consideration of insufficient number of studies and possible systematic differences in the population characteristics and/or in the measurement procedures between the studies, we decided not to conduct a meta-analysis.

Table-3 ~~The s~~Summary table of the neurologic test batteries used in some of the studies battery tests

Formatted: Indent: First line: 4 ch

| Reference                             | Types of neurologic tests       | Symbol Digit        | Digit Span               | Santa Ana | Simple Reaction Time | Syntactic Reasoning(s) |
|---------------------------------------|---------------------------------|---------------------|--------------------------|-----------|----------------------|------------------------|
| Bazylewicz-Walczak et al 1999(21)(23) | Polish NCTB/WAIS (Symbol Degit) | nd                  | nd                       | nd        | **+                  | nd                     |
| Cole et al 1997(11)(33)               | NCTB                            | nm                  | nm                       | nm        | nd                   | nd                     |
| Daniell et al 1992(12)(20)            | NES                             | *-                  | nd                       | nd        | nd                   | nd                     |
| Farahat et al 2003(14)(24)            | Unknown                         | ***++               | ***++(f) <sup>1</sup> *  | nd        | nd                   | nd                     |
|                                       |                                 |                     | ***++(b) <sup>2</sup> ** |           |                      |                        |
| Fiedler et al 1997(15)(34)            | WAIS-R                          | *-                  | *-                       | nd        | ***++                | nd                     |
| London et al 1997(16)(18)             | WAIS-R                          | nm                  | nm                       | ***++     | nm                   | nd                     |
| Maizlish et al 1987(25)(27)           | WAIS                            | ↓***++              | nd                       | nd        | nd                   | nd                     |
| Roldan-Tapia et al 2005(18)(14)       | WAIS                            | ***++ <sup>3†</sup> | ***++ <sup>3†</sup>      | nd        | nd                   | nd                     |
| Ross et al 2010(17)(16)               | WAIS                            | nd                  | ***++                    | nd        | nd                   | nd                     |
| Rothlein et al 2006(32)               | Unknown                         | *                   | *(f) <sup>1</sup>        | nd        | *                    | nd                     |
|                                       |                                 |                     | ***(b) <sup>2</sup>      |           |                      |                        |
| Srivastava et al 2000(29)(31)         | Unknown                         | ***++               | ***++                    | nd        | nd                   | nd                     |
| Steenland et al 2000(30)(11)          | NES                             | *-                  | *-                       | nd        | *-                   | nd                     |
| Stephens et al                        | Unknown                         | ***++               | *-                       | nd        | ***++                | **+                    |

Formatted: Superscript

Formatted: Superscript

Formatted: Superscript

Formatted: Superscript

1  
2  
3  
4  
5  
6  
7  
8  
9  
10  
11  
12  
13  
14  
15  
16  
17  
18  
19  
20  
21  
22  
23  
24  
25  
26  
27  
28  
29  
30  
31  
32  
33  
34  
35  
36  
37  
38  
39  
40  
41  
42  
43  
44  
45  
46  
47  
48  
49  
50  
51  
52  
53  
54  
55  
56  
57  
58  
59  
60

|                |         |    |    |    |    |        |
|----------------|---------|----|----|----|----|--------|
| 1995(19)(12)   |         |    |    |    |    |        |
| Stephens et al | NES/ACT | nm | nm | nd | nm | nm     |
| 1996(31)(17)   |         |    |    |    |    |        |
| Stephens et al | NES/ACT | *_ | *_ | nd | *_ | ***++  |
| 2004(20)(16)   |         |    |    |    |    | (ACTS) |

\*\*\*++-P<0.05, \*\*+-0.05≤P<0.1, \*=-P>0.1;  
 The ~~e~~Exposed groups were slower or had poorer outcomes than the control groups  
<sup>1</sup>+- (f) Digit Span <sup>4</sup>Forward  
<sup>2</sup>-(b) Digit Span <sup>-b</sup>Backward  
<sup>3</sup>+-: The article did not mention whether the obtained results were positive or negative was not reported in the studies.  
 nd: The ~~s~~Subsets of neurological tests were not performed.  
 nm: Although the ~~s~~Subsets of neurological tests were performed but, P-values were not mentioned in the article reported.  
 \*(f) Digit Span forward. \*(b) Digit Span backward

**DISCUSSION**

The ~~systematic keyword and manual searches~~ results showed that there were of the published literature identified 243 epidemiological studies ~~that~~which examined the relationship between OPs and CNS ~~by systematically searching~~. When ~~the relevant information was assessed~~comparing the selected studies by each item, two main findings were obtained; one ~~was~~is the method of exposure assessment, and the other ~~was~~is the method used for the outcome measurement. ~~With respect to~~For exposure assessment, the ~~matter of~~ measurement ~~methods were~~as categorized ~~as~~into three: direct, indirect, and a combination of ~~both methods~~direct and indirect. ~~For the~~ On the other hand, ~~in terms of~~ outcome measurements, ~~there seemed to be~~ two main

- Formatted: Font: 8 pt
- Formatted: Font: 8 pt
- Formatted: Font: 8 pt
- Formatted: Indent: First line: 0.5 ch
- Formatted: Font: 8 pt
- Formatted: Font: 8 pt
- Formatted: Font: 8 pt
- Formatted: Superscript
- Formatted: Superscript
- Formatted: Font: 8 pt, Superscript
- Formatted: Indent: First line: 0.5 ch
- Formatted: Superscript
- Formatted: Font: 8 pt
- Formatted: Font: 8 pt
- Formatted: Font: 8 pt
- Formatted: Indent: First line: 0.5 ch
- Formatted: Font: 8 pt

1  
2  
3  
4  
5  
6  
7  
8  
9 assessments ways were used to gauge neurologic impairment and depressive symptoms.

### 14 Exposure assessment

15  
16 Exposure assessment was not used for group allocation in all the studies; ~~and~~ rather, it  
17  
18 was implemented to measure how much subjects were exposed and the outcomes of the  
19  
20 neurobehavioral tests. ~~Each study used~~ different exposure assessment methods were  
21  
22 used in each study, which made it difficult to accurately compare the studies. In addition,  
23  
24 there seemed to be methodological imperfections in both the direct and indirect methods.  
25  
26 For example ~~To illustrate~~, in one study, an interviews and questionnaires were used ~~in~~  
27  
28 the indirect method, though, ~~one study~~ for the recruited subjects over 60 years old who  
29  
30 had been retired for 11 years ~~since their retirement~~ (17)(21). This method is subject  
31  
32 to the potential of causing in this study, to recall bias ~~could be a problem~~ because the rate  
33  
34 of cognitive impairment is likely to have increased as the subjects aged ~~put on years~~.  
35  
36 This could lead to inaccuracy of exposure assessment. However, other indirect methods,  
37  
38 especially extensive history records of pesticide use could be considered as a proxy of  
39  
40 how much OPs might have accumulated in the body, thus records of this type can be  
41  
42 used to estimate the amount of OPs by long-term exposure, even though there may be  
43  
44 some recall bias. ~~With respect to~~ For the direct methods, ~~there were several ways to~~



1  
2  
3  
4  
5  
6  
7  
8  
9 detect OPs. Although ~~some studies used DPA biomarkers use or dsuch as~~ urinary  
10 metabolites ~~as an indicator of exposure~~ was used, as an exposure index in the study;  
11  
12 however, DPA is metabolized rapidly and excreted ~~\_from bodies\_~~ (6)(7). ~~Therefore,~~  
13 ~~measuring urinary analysis was not a perfect way to assess OPs exposure, o~~ On the  
14 contrary, ~~it seemed that measuring AChE levels was the most reliable way to assess the~~  
15 ~~amount of OP exposure, because the blood AChEholinesterase levels~~ needstake  
16 approximately one week to becomes normal ~~by being synthesized into a new molecular~~  
17 ~~of AChE, which takes around a week\_~~ (39)(35); h Hence, ~~although the amount of OP~~  
18 ~~exposure within one week can be accurately measured by AChE inhibition level in~~  
19 ~~blood, but the blood AChE levels~~ this cannot be be used to assessed the  
20 ~~amountaccumulation of of~~ ~~OPs exposure accumulated~~ in body tissues over for a long  
21 ~~time\_~~ it Thus, ~~direct method using the levels of AChE in blood is appropriate for~~ can be  
22 used to assessing short-term exposure, ~~however, it is not for long term exposure. On the~~  
23 ~~contrary, indirect methods, especially extensive history records of pesticides~~ such as  
24 structured interview and questionnaire could be a proxy helpful to grasp the past  
25 information about OPs use how much OPs were accumulated in the body, even though  
26 there may be some recall bias. In order t To minimize measurement errors, a mixed  
27 method for the assessment of short-term and long-term exposure should be established.  
28  
29  
30  
31  
32  
33  
34  
35  
36  
37  
38  
39  
40  
41  
42  
43  
44  
45  
46  
47  
48  
49  
50  
51  
52  
53  
54

~~a it is desired that standardized measurement method should be established for further research, a combination of direct and indirect methods should be used.~~

### Outcome assessment

~~The main problem in analyzing the outcome measurements was the inconsistencies in the results of neurologic test batteries—were not consistent differed from each study. V, and even if the same test battery was used, the types of tests such as NES and WAIS were different. To elaborate, as shown in Table 3, three studies adopted WAIS and four used NES as outcome assessment, and since there were various versions of the neurologic tests were used in the studies and battery tests including WAIS and WAIS-R, the content of the tests slightly differ slightly from in each study (Table3). Therefore, only a few tests were common across some of the studies, which made it difficult to compare the studies. Further, a meta-analysis could not be applied because of the insufficient a small number of number of studies. MPerforming a meta-analysis could have been performed might be possible by dividing the results into subgroups;- however, the A meta analysis using results that would be obtained from the meta analysis could~~

1  
2  
3  
4  
5  
6  
7  
8  
9 be highly misleading due to because of loss of power of studies (40) and cause sampling  
10 and publication biases. a small number of studies has the potential of causing sampling  
11 and publication bias due to small effect size, and even if a meta analysis was  
12 implemented, the reliability would be low. Similarly, in terms of depressive symptoms,  
13 the outcomes assessment was againere different infrom each study. For instance, one  
14 study usedhad the proportion of headaches, while the another used that of dizziness and  
15 sleepiness as the main outcomes. To gain better insights into whether preeise conelusion  
16 that occupationaleumulative OP exposure can negatively affect the human CNS or not,  
17 at the very least, avoid these problems, aneurologic test batteriesbattery tests, at least,  
18 should be standardized outcome measurement and integrateda guidelines for measuring  
19 of neurologic symptomsimpairment should be set for all future epidemiological studies.  
20  
21  
22  
23  
24  
25  
26  
27  
28  
29  
30  
31  
32  
33  
34  
35  
36  
37  
38  
39  
40  
41  
42  
43  
44  
45  
46  
47  
48  
49  
50  
51  
52  
53  
54  
55  
56  
57  
58  
59  
60

As with exposure assessment, a similar problem can be seen in outcome assessment, for example, five out of the 23 studies adopted depressive symptoms as outcome measurements (Table 2). On the other hand, the remaining 18 studies used neurologic battery tests such as NES and WAIS. Thus the main problem in the outcome measurements is that comparison between the studies could not be done easily, because neurologic battery tests differed by each study. To elaborate, as shown in Table 3, three studies adopted WAIS and four used NES as outcome assessment, and since there were

1  
2  
3  
4  
5  
6  
7  
8  
9 ~~various versions of neurologic battery tests including WAIS and WAIS-R, the content of~~  
10 ~~the tests slightly differ from each study.~~ Furthermore, although some studies mentioned  
11  
12 ~~about~~ the possible relationship between OPs exposure and confounding factors such as  
13  
14 age and education, ~~they did not perform~~ statistical tests between the exposed and control  
15  
16 groups were not performed in these studies. These inconsistencies ~~things obviously~~  
17  
18 make it difficult to compare the ~~outcomes of~~ neurologic impairment outcomes among  
19  
20 the studies. ~~In addition, even in the same neurologic battery test, there are a variety of~~  
21  
22 ~~subtests such as Symbol Digit and Digit Span to measure neurologic impairment. The~~  
23  
24 ~~studies selected some subtests in their trials, hence there were few studies left to~~  
25  
26 ~~precisely compare. As a consequence, although the meta-analysis was carried out using~~  
27  
28 ~~the results of Symbol Digit, it was not enough to determine whether or not there was a~~  
29  
30 ~~statistically significant relationship. Similarly, in terms of depressive symptoms,~~  
31  
32 ~~outcomes were different from each study, for instance, one study had the proportion of~~  
33  
34 ~~headache, while the other used that of dizziness and sleepiness as main outcomes. Thus,~~  
35  
36 ~~neurologic battery tests, at least, should be standardized for further epidemiological~~  
37  
38 ~~research. If not, it could be difficult to gain precise conclusion that cumulative OP~~  
39  
40 ~~exposure can negatively affect human CNS or not.~~  
41  
42  
43  
44  
45  
46  
47  
48  
49  
50  
51  
52  
53  
54  
55  
56  
57  
58  
59  
60

## Study design

~~Although 176 Sixteen of 243 the studies were cross-sectional studies, and six were cohort studies. Longitudinal or cohort studies are more appropriate, desirable rather than cross-sectional studies for three main reasons: one, in cross-sectional studies, it is difficult to confirm whether or not the disease preceded the exposure; two, because the outcome conditions in cross-sectional studies are too short lasting (36); and three, cross-sectional studies are suitable for investigating at a certain point, but they are not appropriate for mid-term studies. Especially, agricultural work using pesticides is easily influenced by seasonality; and one research regarding reproductive health by OPs exposure stated that sperm concentration and counts are negatively affected in spring peak season, spring, rather than winter (5)(6). Therefore, the result effect on the the CNS neurobehavioral tests may could also be affected by seasonality; therefore, cohort studies are ideal to assess the influence of occupational OPs exposure than cross-sectional.~~

## Sources of Possible biases

~~Only published studies written in English were searched, thus publication bias could have occurred. In future studies, non-English studies and unpublished studies should be~~

1  
2  
3  
4  
5  
6  
7  
8  
9 ~~included to reduce publication bias. If foreign workers are included in the trials that~~  
10 ~~included foreign workers, their first language and education levels should~~could be  
11 considered as possible biases. ~~B~~ b because there is a possibility that ~~the~~ non-native  
12 subjects ~~cannot~~did not fully understand the content and instructions ~~of~~for the tests,  
13 which could lead to them obtaining a lower score than ~~that of~~ native speakers.  
14 Additionally, the education systems in developed and less developed countries could be  
15 very different. Nowadays, developed countries such as USA and the ~~g~~Gulf countries  
16 have accepted foreign workers ~~from India and South American countries~~ as an  
17 important part of the work-force (12, 32, 41)~~(20, 37, 38)~~. These factors needed to be  
18 adjusted carefully in the sampling and analytical stages of the study. ~~H~~ however, ~~in this~~  
19 ~~systematic review, there were~~ only two of the selected studies ~~to~~ mentioned about first  
20 language in their statistical analyses ~~inclusion and exclusion criteria~~ (12, 31)~~(17, 20)~~.  
21 ~~Since first language could influence the outcomes, it should be one of the factors to be~~  
22 ~~considered when selecting subjects. Furthermore, when migrants and foreign labourers~~  
23 ~~are included in the studies, education system is a point that we have to pay attention.~~  
24 ~~Because education system between developed and less developed countries could be~~  
25 ~~largely different. Hence, it is necessary to be careful when the results between subjects~~  
26 ~~who come from different countries are compared. Additionally, occupations could be a~~

1  
2  
3  
4  
5  
6  
7  
8  
9 ~~factor of also contribute to~~ selection bias; because, ~~for example, a~~ police officer ~~or and~~  
10 construction workers ~~would~~ have a ~~higher possibility~~probability of experiencing ~~the~~ loss  
11 of consciousness due to accidents ~~of their jobs~~than workers with different occupations  
12  
13  
14  
15  
16  
17 (17) ~~(21)~~.

### 21 Possible confounders

22  
23  
24 ~~Age and social cultural factors are known as common confounding factors, though, not~~  
25 ~~all studies adjusted them in the analysis. These factors could easily influence the results;~~  
26  
27 ~~hence they should be adjusted for further trials. Moreover, Apart from common~~  
28  
29 ~~confounders such as age and education, since head injury and alcohol consumption~~  
30  
31 ~~could be other confounders, because have a probability of negatively affecting~~  
32  
33 ~~neurologic battery tests, they can cause neurologic impairment due to memory~~  
34  
35 ~~deterioration they should be treated as potential confounders as well. Although some of~~  
36  
37 ~~the studies adjusted for alcohol consumption in the analysis (10, 12, 16, 24, 25) (10, 15,~~  
38  
39 ~~18, 20, 27), no study adjusted for head injury. However, the results showed that there~~  
40  
41  
42  
43  
44  
45  
46  
47 ~~was no study to adjust head injury in the logistic regression, on the other hand, there~~  
48  
49 ~~were some studies to adjust alcohol consumption in the analysis (10, 15, 18, 20, 27).~~  
50  
51  
52 ~~Apart from these factors~~Furthermore, ~~participants~~<sup>2</sup> nutrition status including vitamin  
53  
54

1  
2  
3  
4  
5  
6  
7  
8  
9 deficiency ~~can~~ also be relevant to the outcome of neuropsychological tests (16, 24)(15,  
10  
11 18). Thus, ~~all~~-factors other than the common confounders that could negatively~~an~~ affect  
12  
13 ~~measurements of~~ cognitive function should be adjusted for in the analysis.  
14  
15

### ~~Limitations~~ Strengths and limitations of this review ~~study weaknesses~~

#### Strengths

16  
17  
18  
19  
20  
21  
22  
23  
24 A major strength of this systematic review is that the characteristics of the selected  
25  
26 studies were summarized using tables, and limitations of the exposure and outcome  
27  
28 assessments used in these studies were ~~mainly~~ identified mainly on the basis of the  
29  
30 constructed tables. Furthermore, the systematic review allowed us to propose  
31  
32 recommendations that will be useful for standardizing future epidemiological research.  
33  
34  
35

#### Weaknesses

36  
37  
38  
39  
40 All of the selected studies were relevant to occupational OPs exposure; however, some  
41  
42 of them included other pesticides such as carbamates, fungicides, and herbicides.  
43  
44 Pesticides that are commonly used in agriculture are usually mixtures of different  
45  
46 pesticides, which are used to increase their effect. Four of the 243 selected studies used  
47  
48 a combination of OPs, organochlorines, carbamates, and fungicide; hence, the effect of  
49  
50 only occupational OPs exposure could not be measured in these studies.  
51  
52  
53  
54

Formatted: Font: Not Bold

Formatted: Indent: First line: 0 ch

Formatted: Font: Not Bold

Formatted: Indent: First line: 0 ch



1  
2  
3  
4  
5  
6  
7  
8  
9 ~~In~~ Although all of the studies which were collected in this systematic review were  
10 relevant to occupational OP exposure, some of them included other pesticides such as  
11 carbamates, fungicides, and herbicides. Pesticides usually are mixed with another type  
12 of pesticides to make their effects stronger, and this is the common in agriculture. In  
13 ~~this~~ systematic review, four out of 23 studies were not single OPs exposure and they  
14 used a combination of OPs, OCs carbamates and fungicide, which complicated  
15 Therefore, it may be quite difficult to measure the effect of only occupational OP  
16 exposure.

17  
18  
19  
20  
21  
22  
23  
24  
25  
26  
27  
28  
29 Of these studies, the outcome assessments<sup>18</sup> assessed neurological or  
30 neuropsychological impairment using IQ tests. However, since the authors used the  
31 different neurological types of tests were used battery tests such as NCTB, NES, and  
32 WAIS, consequently, the lack of pooling evidence meant that there were only a few  
33 common tests including Digit Span and Symbol digit tests across the studies,  
34 comparisons among the studies became extremely difficult, furthermore, which made  
35 the comparison of the included studies more difficult. Hence, a meta-analysis was  
36 could  
37 not be performed applied to the two tests, but it is Small effect size due to a small  
38 number of studies may cause sampling and publication bias. and even if a meta-analysis  
39 is applied, it would be unreliable obvious that studies which can be appraised are  
40  
41  
42  
43  
44  
45  
46  
47  
48  
49  
50  
51  
52  
53  
54  
55  
56  
57  
58  
59  
60

1  
2  
3  
4  
5  
6  
7  
8  
9 limited. In order to completely assess neurological impairment, there is necessity of the  
10 standardized tests battery for measuring neurological impairment it is desirable that the  
11 same neurobehavioral test battery be used in a large number of studies. Furthermore  
12 in  
13 addition, the exclusion~~excluding~~ of studies written in languages other than English is  
14 one of the~~another~~ limitations of this study review.  
15  
16  
17  
18  
19  
20  
21  
22  
23  
24  
25  
26  
27  
28  
29

## CONCLUSION

30  
31  
32 Although~~While~~ some studies indicated negative influence on the human CNS based on  
33 the results of neurobehavioral or neuropsychological test batteries, the others did not.  
34  
35 Hence, enough consistent results were not obtained to determine whether or not  
36 occupational OPs exposure could be harmful on the human CNS. the suggestive  
37 evidence for neurobehavioral test battery is inconsistent, there was a slight positive  
38 relationship of poor outcome implying that occupational exposure to OPs could be  
39 harmful for the CNS of the human. The evidence was weak in particular because some  
40 studies showed that there was a negative relationship of OPs with poor outcome. In  
41  
42  
43  
44  
45  
46  
47  
48  
49  
50  
51  
52 addition, since~~t~~ The test items tested in~~of~~ the neuro~~logical~~ behavioral or  
53  
54  
55  
56  
57  
58  
59  
60

1  
2  
3  
4  
5  
6  
7  
8  
9 neuropsychological test batteries, and the estimates of OPs exposure were inconsistent  
10  
11 because they depended on the preferences of the investigators, thus they were  
12  
13 inconsistent, only a few items were common across the studies. Consequently, because  
14  
15 there were only a few studies left, a meta-analysis could not be performed for the  
16  
17 meta-analysis; indeed, there were a few items which could be compared. For future  
18  
19 studies, the neurological behavioral and/or neuropsychological test types, test batteries,  
20  
21 and the methods used to measuring method of OPs, should be standardized in order  
22  
23 to ensure adequate quality and to make it more possible to pooling the evidence from a  
24  
25 large number of the studies for future analysis.  
26  
27  
28  
29  
30  
31  
32  
33  
34  
35  
36

Formatted: Indent: First line: 0 ch

## ACKNOWLEDGMENTS

We ~~wish to express our appreciation to~~thank Professor Ben Armstrong for his  
insightful comments on our paper.

## FOOTNOTES

**Contributors** NT conceived the study design and participated in protocol development,  
literature searching, data extraction, data analysis, and drafted the manuscript. MH

critically reviewed the draft and contributed to the manuscript revisions.

**Funding** ~~This research received n~~No specific grant was obtained from any public funding agency for this researchy in the public.

**Competing interests** None.

**Ethical approval** Systematic review.

**Provenance and peer review** Not commissioned, externally peer reviewed.

**Data sharing statement** No additional data are available.

## REFERENCES

1. ~~Centre WHOM. Pesticides are a leading suicide method. 2006.~~
2. ~~Steenland K, Jenkins B, Ames RG, et al. (2). American journal of public health. 1994;84(5):731-6. Epub 1994/05/01.~~
3. ~~Moretto A, Lotti M. Poisoning by organophosphorus insecticides and sensory neuropathy. Journal of neurology, neurosurgery, and psychiatry. 1998;64(4):463-8. Epub 1998/05/12.~~
4. ~~Rohlman DS, Arcury TA, Quandt SA, et al. Neurobehavioral performance in preschool children from agricultural and non-agricultural communities in Oregon and North Carolina. Neurotoxicology. 2005;26(4):589-98. Epub 2005/08/23.~~

5. ~~Rastogi SK, Tripathi S, Ravishanker D. A study of neurologic symptoms on exposure to organophosphate pesticides in the children of agricultural workers. Indian journal of occupational and environmental medicine. 2010;14(2):54-7. Epub 2010/12/02.~~
6. ~~Recio Vega R, Ocampo Gomez G, Borja Aburto VH, et al. Organophosphorus pesticide exposure decreases sperm quality: association between sperm parameters and urinary pesticide levels. Journal of applied toxicology : JAT. 2008;28(5):674-80. Epub 2007/11/30.~~
7. ~~Yuera S, Gaseo M, Rubio J, et al. Semen quality in Peruvian pesticide applicators: association between urinary organophosphate metabolites and semen parameters. Environ Health Glob. 2008;7:-.~~
8. ~~Yuera S, Rubio J, Gaseo M, et al. Semen quality and reproductive sex hormone levels in Peruvian pesticide sprayers. International journal of occupational and environmental health. 2006;12(4):355-61.~~
9. ~~Albers JW, Berent S, Garabrant DH, et al. The effects of occupational exposure to chlorpyrifos on the neurologic examination of central nervous system function: a prospective cohort study. Journal of occupational and environmental medicine / American College of Occupational and Environmental Medicine. 2004;46(4):367-78.~~

1  
2  
3  
4  
5  
6  
7  
8  
9 Epub 2004/04/13.

10  
11 10. — Beseler C, Stallones L, Hoppin JA, et al. Depression and pesticide exposures in  
12 female spouses of licensed pesticide applicators in the agricultural health study cohort.  
13 *Journal of occupational and environmental medicine / American College of*  
14 *Occupational and Environmental Medicine*. 2006;48(10):1005-13. Epub 2006/10/13.

15  
16  
17  
18  
19  
20  
21 11. — Steenland K, Dick RB, Howell RJ, et al. Neurologic function among  
22 termiticide applicators exposed to chlorpyrifos. *Environmental health perspectives*.  
23  
24  
25  
26  
27 2000;108(4):293-300. Epub 2000/04/07.

28  
29  
30 12. — Stephens R, Spurgeon A, Calvert IA, et al. Neuropsychological effects of  
31 long term exposure to organophosphates in sheep dip. *Lancet*. 1995;345(8958):1135-9.  
32  
33  
34  
35 Epub 1995/05/06.

36  
37  
38 13. — Dassanayake T, Gawarammana IB, Weerasinghe V, et al. Auditory  
39 event related potential changes in chronic occupational exposure to organophosphate  
40 pesticides. *Clinical neurophysiology : official journal of the International Federation of*  
41 *Clinical Neurophysiology*. 2009;120(9):1693-8. Epub 2009/08/18.

42  
43  
44  
45  
46  
47 14. — Roldan Tapia L, Parron T, Sanchez Santed F. Neuropsychological effects of  
48 long term exposure to organophosphate pesticides. *Neurotoxicology and teratology*.  
49  
50  
51  
52 2005;27(2):259-66. Epub 2005/03/01.

- 1  
2  
3  
4  
5  
6  
7  
8  
9 15. London L, Nell V, Thompson ML, et al. Effects of long term organophosphate  
10 exposures on neurological symptoms, vibration sense and tremor among South African  
11 farm workers. *Scandinavian journal of work, environment & health*. 1998;24(1):18-29.  
12  
13 Epub 1998/04/30.
- 14  
15  
16  
17  
18  
19 16. Stephens R, Sreenivasan B. Neuropsychological effects of long term low level  
20 organophosphate exposure in orchard sprayers in England. *Archives of environmental*  
21  
22 *health*. 2004;59(11):566-74. Epub 2006/04/08.
- 23  
24  
25  
26  
27 17. Stephens R, Spurgeon A, Berry H. Organophosphates: the relationship between  
28 chronic and acute exposure effects. *Neurotoxicology and teratology*. 1996;18(4):449-53.  
29  
30 Epub 1996/07/01.
- 31  
32  
33  
34  
35 18. London L, Myers JE, Nell V, et al. An investigation into neurologic and  
36 neurobehavioral effects of long term agrichemical use among deciduous fruit farm  
37  
38 workers in the Western Cape, South Africa. *Environmental research*.  
39  
40 1997;73(1-2):132-45. Epub 1997/01/01.
- 41  
42  
43  
44  
45 19. Cole DC, Carpio F, Julian J, et al. Neurobehavioral outcomes among farm and  
46 nonfarm rural Ecuadorians. *Neurotoxicology and teratology*. 1997;19(4):277-86.
- 47  
48  
49  
50 20. Daniell W, Barnhart S, Demers P, et al. Neuropsychological performance  
51 among agricultural pesticide applicators. *Environmental research*. 1992;59(1):217-28.  
52  
53  
54

1  
2  
3  
4  
5  
6  
7  
8  
9 ~~Epub 1992/10/01.~~

10  
11 ~~21. Mackenzie Ross SJ, Brewin CR, Curran HV, et al. Neuropsychological and~~  
12 ~~psychiatric functioning in sheep farmers exposed to low levels of organophosphate~~  
13 ~~pesticides. Neurotoxicology and teratology. 2010;32(4):452-9. Epub 2010/03/17.~~

14  
15  
16  
17  
18  
19 ~~22. Fiedler N, Kipen H, KellyMcNeil K, et al. Long term use of organophosphates~~  
20 ~~and neuropsychological performance. American journal of industrial medicine.~~  
21 ~~1997;32(5):487-96.~~

22  
23  
24  
25  
26  
27 ~~23. Bazylewicz Waleczak B, Majczakowa W, Szymczak M. Behavioral effects of~~  
28 ~~occupational exposure to organophosphorous pesticides in female greenhouse planting~~  
29 ~~workers. Neurotoxicology. 1999;20(5):819-26. Epub 1999/12/11.~~

30  
31  
32  
33  
34  
35 ~~24. Farahat TM, Abdelrasoul GM, Amr MM, et al. Neurobehavioural effects~~  
36 ~~among workers occupationally exposed to organophosphorous pesticides. Occupational~~  
37 ~~and environmental medicine. 2003;60(4):279-86. Epub 2003/03/28.~~

38  
39  
40  
41  
42  
43 ~~25. Korsak RJ, Sato MM. Effects of chronic organophosphate pesticide exposure~~  
44 ~~on the central nervous system. Clinical toxicology. 1977;11(1):83-95. Epub 1977/01/01.~~

45  
46  
47  
48  
49  
50 ~~26. Levin HS, Rodnitzky RL, Mick DL. Anxiety associated with exposure to~~  
51 ~~organophosphate compounds. Archives of general psychiatry. 1976;33(2):225-8. Epub~~  
52 ~~1976/02/01.~~



- 1  
2  
3  
4  
5  
6  
7  
8  
9 27. — Maizlish N, Schenker M, Weisskopf C, et al. S. A behavioral evaluation of pest  
10 control workers with short term, low level exposure to the organophosphate diazinon.  
11 *American journal of industrial medicine*. 1987;12(2):153-72. Epub 1987/01/01.  
12  
13  
14  
15  
16 28. — Misra UK, Nag D, Bhushan V, et al. Clinical and biochemical changes in  
17 chronically exposed organophosphate workers. *Toxicology letters*. 1985;24(2-3):187-93.  
18  
19 Epub 1985/02/01.  
20  
21  
22  
23  
24 29. — Ohayo-Mitoko GJ, Kromhout H, Simwa JM, et al. Self reported symptoms and  
25 inhibition of acetylcholinesterase activity among Kenyan agricultural workers.  
26  
27  
28  
29  
30  
31  
32  
33 30. — Rodnitzky RL. Occupational exposure to organophosphate pesticides: a  
34 neurobehavioral study. *Archives of environmental health*. 1975;30(2):98-103. Epub  
35  
36  
37  
38  
39  
40  
41  
42  
43  
44  
45  
46  
47  
48 31. — Srivastava AK, Gupta BN, Bihari V, et al. Clinical, biochemical and  
49 neurobehavioural studies of workers engaged in the manufacture of quinalphos. *Food  
50 and chemical toxicology : an international journal published for the British Industrial  
51 Biological Research Association*. 2000;38(1):65-9. Epub 2000/02/24.  
52  
53  
54  
55  
56  
57  
58  
59  
60 32. — GA Wells BS, D O'Connell, J Peterson, et al. The Newcastle-Ottawa Scale  
(NOS) for assessing the quality of nonrandomised studies in meta analyses. 2010.

1  
2  
3  
4  
5  
6  
7  
8  
9 33. Cole DC, Carpio F, Julian J, et al. Neurobehavioral outcomes among farm and  
10 nonfarm rural Ecuadorians. *Neurotoxicology and teratology*. 1997;19(4):277-86. Epub  
11 1997/07/01.

12  
13  
14  
15  
16 34. Fiedler N, Kipen H, Kelly McNeil K, et al. Long-term use of organophosphates  
17 and neuropsychological performance. *American journal of industrial medicine*.  
18 1997;32(5):487-96. Epub 1997/11/05.

19  
20  
21  
22  
23 35. Ngowi AV, Maeda DN, Partanen TJ, et al. Acute health effects of  
24 organophosphorus pesticides on Tanzanian small scale coffee growers. *J Expo Anal*  
25 *Environ Epidemiol*. 2001;11(4):335-9. Epub 2001/09/26.

26  
27  
28  
29  
30 36. Armstrong B. Comment for the final draft. 2010.

31  
32  
33  
34 37. Gomes J, Lloyd O, Revitt MD, et al. Morbidity among farm workers in a desert  
35 country in relation to long term exposure to pesticides. *Scand J Work Env Hea*.  
36 1998;24(3):213-9.

37  
38  
39  
40  
41 38. Griffin J, Soskolne V. Psychological distress among Thai migrant workers in  
42 Israel. *Soc Sci Med*. 2003;57(5):769-74.

43  
44  
45  
46  
47  
48  
49  
50  
51  
52 Formatted: Indent: First line: 0 ch

1. Steenland K, Jenkins B, Ames RG, ~~et al.~~, ~~O'Malley M, Chrislip D, Russo J~~. Chronic neurological sequelae to organophosphate pesticide poisoning. *American journal of public health*. 1994;84(5):731-6. Epub 1994/05/01.
2. Moretto A, Lotti M. Poisoning by organophosphorus insecticides and sensory neuropathy. *Journal of neurology, neurosurgery, and psychiatry*. 1998;64(4):463-8. Epub 1998/05/12.
3. Rohlman DS, Arcury TA, Quandt SA, ~~Lasarev M, Rothlein J, Travers R,~~ et al. Neurobehavioral performance in preschool children from agricultural and non-agricultural communities in Oregon and North Carolina. *Neurotoxicology*. 2005;26(4):589-98. Epub 2005/08/23.
4. Rastogi SK, Tripathi S, Ravishanker D. A study of neurologic symptoms on exposure to organophosphate pesticides in the children of agricultural workers. *Indian journal of occupational and environmental medicine*. 2010;14(2):54-7. Epub 2010/12/02.
5. Recio-Vega R, Ocampo-Gomez G, Borja-Aburto VH, ~~Moran-Martinez J, Cebrian-Garcia ME~~ et al. Organophosphorus pesticide exposure decreases sperm quality: association between sperm parameters and urinary pesticide levels. *J Appl Toxicol*. 2008;28(5):674-80. Epub 2007/11/30.
6. Yucra S, Gasco M, Rubio J, ~~Gonzales GF~~ et al. Semen quality in Peruvian pesticide applicators: association between urinary organophosphate metabolites and semen parameters. *Environ Health-Glob*. 2008;7:-.
7. Yucra S, Rubio J, Gasco M, ~~Gonzales C, Steenland K, Gonzales GF~~ et al. Semen quality and reproductive sex hormone levels in Peruvian pesticide sprayers. *Int J Occup Env Heal*. 2006;12(4):355-61.
8. Ovid Technologies I. Ovid SP. (~~access date:cited~~ 2014 23 April); Available from: <http://gateway.ovid.com/>.
9. Albers JW, Berent S, Garabrant DH, ~~Giordani B, Schweitzer SJ, Garrison RP,~~ et al. The effects of occupational exposure to chlorpyrifos on the neurologic examination of central nervous system function: a prospective cohort study. *J Occup Environ Med*. 2004;46(4):367-78. Epub 2004/04/13.
10. Beseler C, Stallones L, Hoppin JA, ~~Alavanja MC, Blair A, Keefe T,~~ et al. Depression and pesticide exposures in female spouses of licensed pesticide applicators in the agricultural health study cohort. *J Occup Environ Med*. 2006;48(10):1005-13. Epub 2006/10/13.
11. Cole DC, Carpio F, Julian J, ~~Leon N, Carbotte R, DeAlmeida Het~~ et al. Neurobehavioral outcomes among farm and nonfarm rural Ecuadorians. *Neurotoxicology and Teratology*. 1997;19(4):277-86.

Formatted: Default Paragraph Font, Font: 10.5 pt, Check spelling and grammar

- 1  
2  
3  
4  
5  
6  
7  
8  
9  
10  
11  
12  
13  
14  
15  
16  
17  
18  
19  
20  
21  
22  
23  
24  
25  
26  
27  
28  
29  
30  
31  
32  
33  
34  
35  
36  
37  
38  
39  
40  
41  
42  
43  
44  
45  
46  
47  
48  
49  
50  
51  
52  
53  
54  
55  
56  
57  
58  
59  
60
12. Daniell W, Barnhart S, Demers P, ~~Costa LG, Eaton DL, Miller M~~, et al. Neuropsychological Performance among Agricultural Pesticide Applicators. *Environ Res.* 1992;59(1):217-28.
  13. Dassanayake T, Gawarammana IB, Weerasinghe V, ~~Dissanayake PS, Pragaash S, Dawson A~~, et al. Auditory event-related potential changes in chronic occupational exposure to organophosphate pesticides. *Clin Neurophysiol.* 2009;120(9):1693-8. Epub 2009/08/18.
  14. Farahat TM, Abdelrasoul GM, Amr MM, ~~Shebl MM, Farahat FM, Anger WK~~ et al. Neurobehavioural effects among workers occupationally exposed to organophosphorous pesticides. *Occup Environ Med.* 2003;60(4):279-86.
  15. Fiedler N, Kipen H, KellyMcNeil K, ~~Fenske Ret al.~~ Long-term use of organophosphates and neuropsychological performance. *Am J Ind Med.* 1997;32(5):487-96.
  16. London L, Myers JE, Nell V, ~~Taylor T, Thompson ML~~ et al. An investigation into neurologic and neurobehavioral effects of long-term agrichemical use among deciduous fruit farm workers in the Western Cape, South Africa. *Environ Res.* 1997;73(1-2):132-45.
  17. Mackenzie Ross SJ, Brewin CR, Curran HV, ~~Furlong CE, Abraham-Smith KM, Harrison Vet al.~~ Neuropsychological and psychiatric functioning in sheep farmers exposed to low levels of organophosphate pesticides. *Neurotoxicol Teratol.* 2010;32(4):452-9. Epub 2010/03/17.
  18. Roldan-Tapia L, Parron T, Sanchez-Santed F. Neuropsychological effects of long-term exposure to organophosphate pesticides. *Neurotoxicol Teratol.* 2005;27(2):259-66. Epub 2005/03/01.
  19. Stephens R, Spurgeon A, Calvert IA, ~~Beach J, Levy LS, Berry H~~, et al. Neuropsychological effects of long-term exposure to organophosphates in sheep dip. *Lancet.* 1995;345(8958):1135-9. Epub 1995/05/06.
  20. Stephens R, Sreenivasan B. Neuropsychological effects of long-term low-level organophosphate exposure in orchard sprayers in England. *Arch Environ Health.* 2004;59(11):566-74.
  21. Bazylewicz-Walczak B, Majczakowa W, Szymczak M. Behavioral effects of occupational exposure to organophosphorous pesticides in female greenhouse planting workers. *Neurotoxicology.* 1999;20(5):819-26.
  22. Korsak RJ, Sato MM. Effects of chronic organophosphate pesticide exposure on the central nervous system. *Clin Toxicol.* 1977;11(1):83-95. Epub 1977/01/01.
  23. Levin HS, Rodnitzky RL, Mick DL. Anxiety associated with exposure to organophosphate compounds. *Arch Gen Psychiatry.* 1976;33(2):225-8. Epub 1976/02/01.
  24. London L, Nell V, Thompson ML, ~~Myers JE~~ et al. Effects of long-term organophosphate exposures on neurological symptoms, vibration sense and tremor among

South African farm workers. *Scand J Work Env Hea*. 1998;24(1):18-29.

25. Maizlish N, Schenker M, Weisskopf C, ~~Seiber J, Samuels Set al~~. A behavioral evaluation of pest control workers with short-term, low-level exposure to the organophosphate diazinon. *Am J Ind Med*. 1987;12(2):153-72. Epub 1987/01/01.

26. Misra UK, Nag D, Bhushan V, ~~Ray PK et al~~. Clinical and biochemical changes in chronically exposed organophosphate workers. *Toxicol Lett*. 1985;24(2-3):187-93. Epub 1985/02/01.

27. Ohayo-Mitoko GJ, Kromhout H, Simwa JM, ~~Boleij JS, Heederik Det al~~. Self reported symptoms and inhibition of acetylcholinesterase activity among Kenyan agricultural workers. *Occup Environ Med*. 2000;57(3):195-200. Epub 2000/05/16.

28. Rodnitzky RL. Occupational exposure to organophosphate pesticides: a neurobehavioral study. *Arch Environ Health*. 1975;30(2):98-103. Epub 1975/02/01.

29. Srivastava AK, Gupta BN, Bihari V, ~~Mathur N, Srivastava LP, Pangtey BS, et al~~. Clinical, biochemical and neurobehavioural studies of workers engaged in the manufacture of quinalphos. *Food Chem Toxicol*. 2000;38(1):65-9.

30. Steenland K, Dick RB, Howell RJ, ~~Chrislip DW, Hines CJ, Reid TM, et al~~. Neurologic function among termiticide applicators exposed to chlorpyrifos. *Environ Health Persp*. 2000;108(4):293-300.

31. Stephens R, Spurgeon A, Berry H. Organophosphates: the relationship between chronic and acute exposure effects. *Neurotoxicology and teratology*. 1996;18(4):449-53.

32. Rothlein J, Rohlman D, Lasarev M, ~~Phillips J, Muniz J, McCauley Let al~~. Organophosphate pesticide exposure and neurobehavioral performance in agricultural and non-agricultural Hispanic workers. *Environ Health Perspect*. 2006;114(5):691-6. Epub 2006/05/06.

33. Institute OHR. The Newcastle-Ottawa Scale (NOS) for assessing the quality of nonrandomised studies in meta-analyses. (~~{access date:cited 2014 26 April}!~~ Available from: [http://www.ohri.ca/programs/clinical\\_epidemiology/oxford.asp](http://www.ohri.ca/programs/clinical_epidemiology/oxford.asp).

34. Wechsler D. Manual for the Wechsler Adult Intelligence Scale. New York: Psychological corporation; 1955: pp1-110-p.

35. Wechsler D. Manual for the Wechsler Adult Intelligence Scale-Revised. New York: Psychological corporation; 1981: pp1-156-p.

36. Baker EL, Letz RE, Fidler AT, ~~Shalat S, Plantamura D, Lyndon Met al~~. A computer-based neurobehavioral evaluation system for occupational and environmental epidemiology: methodology and validation studies. *Neurobehavioral toxicology and teratology*. 1985;7(4):369-77. Epub 1985/07/01.

37. B.L. Johnson ME, C. Xintaras, E.L. Baker, ~~Jr., H. Hanninen, and A.Met al~~.

Formatted: Default Paragraph Font, Font: 10.5 pt, Check spelling and grammar

1  
2  
3  
4  
5  
6  
7  
8 Seppalainen. Prevention of neurotoxic illness in working populations. London: John Willey  
9 & Sons; 1987: [pp1-274-p](#).

10  
11 38. Anger WK. Neurobehavioural tests and systems to assess neurotoxic exposures in  
12 the workplace and community. *Occup Environ Med*. 2003;60(7):531-8, 474. Epub 2003/06/24.

13  
14 39. Ngowi AV, Maeda DN, Partanen TJ, [Sanga MP, Mbise Get al](#). Acute health effects  
15 of organophosphorus pesticides on Tanzanian small-scale coffee growers. *J Expo Anal*  
16 *Environ Epidemiol*. 2001;11(4):335-9. Epub 2001/09/26.

17  
18 40. Higgins JP, Thompson SG, Deeks JJ, [Altman DG et al](#). Measuring inconsistency in  
19 meta-analyses. *BMJ*. 2003;327(7414):557-60. Epub 2003/09/06.

20  
21 41. Gomes J, Lloyd O, Revitt MD, [Basha Met al](#). Morbidity among farm workers in a  
22 desert country in relation to long-term exposure to pesticides. *Scand J Work Env Hea*.  
23 1998;24(3):213-9.

24  
25 

---

---

1  
2  
3  
4  
5  
6  
7  
8  
9  
10  
11  
12  
13  
14  
15  
16  
17  
18  
19  
20  
21  
22  
23  
24  
25  
26  
27  
28  
29  
30  
31  
32  
33  
34  
35  
36  
37  
38  
39  
40  
41  
42  
43  
44  
45  
46  
47  
48  
49  
50  
51  
52  
53  
54  
55  
56  
57  
58  
59  
60

**FIGURE LEGEND**

Figure 1: Flow diagram of search and review process

Figure1 represents how the selected articles were searched. After electric search was conducted with restriction of published year, human, and English, a manual search of titles and abstracts was carried out. As a result, the remaining 21 studies were fully reviewed, and 12 studies met the inclusion and exclusion criteria. Another 12 studies were found by hand search.

Formatted: Left, Line spacing: single, Widow/Orphan control

Comment [橋爪真弘1]: Figure1を見れば自明なので、説明は不要と思います。タイトルだけでよいでしょう。

4/1/2014 10:35:00 AM  
4/1/2014 10:35:00 AM

4/1/2014 10:35:00 AM

4/1/2014 10:35:00 AM

4/1/2014 10:35:00 AM

4/1/2014 10:35:00 AM

4/1/2014 10:35:00 AM

4/1/2014 10:35:00 AM

4/1/2014 10:35:00 AM

For peer review only

- 1
- 2
- 3
- 4
- 5
- 6
- 7
- 8
- 9
- 10
- 11
- 12
- 13
- 14
- 15
- 16
- 17
- 18
- 19
- 20
- 21
- 22
- 23
- 24
- 25
- 26
- 27
- 28
- 29
- 30
- 31
- 32
- 33
- 34
- 35
- 36
- 37
- 38
- 39
- 40
- 41
- 42
- 43
- 44
- 45
- 46
- 47
- 48
- 49
- 50
- 51
- 52
- 53
- 54
- 55
- 56
- 57
- 58
- 59
- 60



1  
2  
3  
4  
5  
6  
7  
8  
9  
10  
11  
12  
13  
14  
15  
16  
17  
18  
19  
20  
21  
22  
23  
24  
25  
26  
27  
28  
29  
30  
31  
32  
33  
34  
35  
36  
37  
38  
39  
40  
41  
42  
43  
44  
45  
46  
47  
48  
49  
50  
51  
52  
53  
54  
55  
56  
57  
58  
59  
60

For peer review only

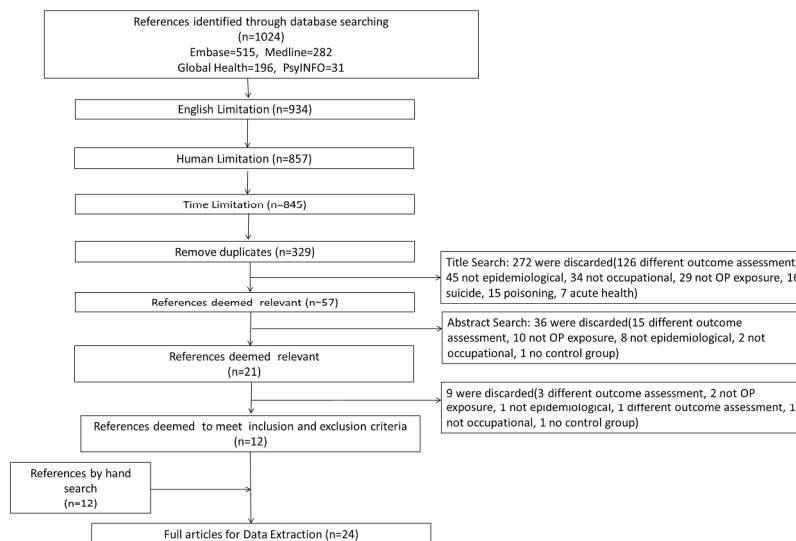

The figure1 represents the flow of database search and review process.  
299x179mm (300 x 300 DPI)

review only

**Appendix A****The Appraisal Standard of Newcastle/Ottawa Scale****Selection**

- 1) Representativeness of the exposed group/cohort
  - a) Truly representative of the average farmers or pesticides applicators in the community\*
  - b) Somewhat representative of the average farmers or pesticides applicators in the community\*
  - c) Selected group of users (e.g. factory workers, volunteers)
  - d) No description of the derivation of the group
- 2) Selection of the non-exposed group/cohort
  - a) Drawn from the same community as the exposed group\*
  - b) Drawn from a different source
  - c) No description of the derivation of the non-exposed group
- 3) Ascertainment of exposure
  - a) Secure record (e.g. biomarkers)\*
  - b) Structured interview or questionnaire\*
  - c) Written self reports
  - d) No description
- 4) Demonstration that outcome of interest was not present at start of study (*Cohort Studies Only*)
  - a) Yes\*
  - b) No

**Confounder**

- 1) Comparability of groups on the basis of the design or analysis
  - a) Study controls for age and education\*
  - b) Study controls for any additional factor\* (e.g. alcohol consumption, smoking, and first language)

**Outcome**

- 1) Assessment of outcome
  - a) Independent blind assessment\*
  - b) Record linkage\*
  - c) Self reports

- 1  
2  
3 d) No description  
4  
5  
6 2) Was follow-up long enough for outcomes to occur (*Cohort Studies Only*)  
7 a) Yes (select an adequate follow up period for outcome of interest)\*  
8 b) No  
9  
10  
11 3) Adequacy of follow up of cohorts (*Cohort Studies Only*)  
12 a) Complete follow up – all subjects accounted for\*  
13 b) Subjects lost to follow up unlikely to introduce bias – small number lost - > 70% follow  
14 up, or description provided of those lost\*  
15 c) Follow up < 70% and no description of those lost  
16 d) No statement  
17  
18  
19  
20  
21  
22

23 *Case Control Studies:*

24 **Selection**

- 25 1) Is the case definition adequate?  
26 a) Yes, with independent validation\*  
27 b) Yes, e.g. record linkage on self reports  
28 c) No description  
29  
30  
31  
32  
33  
34 2) Representativeness of the cases  
35 a) Consecutive or obviously representative series of cases\*  
36 b) Potential for selection biases or non stated  
37  
38  
39  
40 3) Selection of Controls  
41 a) Community controls\*  
42 b) Hospital controls  
43 c) No description  
44  
45  
46  
47 4) Definition of Controls  
48 a) No history of disease (endpoint)\*  
49 b) No description of source  
50  
51  
52

53 **Confounder**

- 54 1) Comparability of cases and controls on the basis of design or analysis  
55 a) Study controls for age and education\*  
56 b) Study controls for any additional factor\*  
57  
58  
59  
60

**Exposure**

- 1) Ascertainment of exposure
    - a) Secure record (e.g. biomarkers)\*
    - b) Structured interview where blind to case/control status\*
    - c) Interview not blinded to case/ control status
    - d) Written self reports or medical record only
    - e) No description
  - 2) Same method of ascertainment for cases and controls
    - a) Yes\*
    - b) No
  - 3) Non-Response rate
    - a) Same rate for both groups\*
    - b) Non respondents described
    - c) Rate different and no designation
- \*: plus one point

There are five items in cross-sectional studies and eight items in cohort and case control studies, respectively. The quality of the studies was defined as follows.

*Cross-sectional Studies:*

Very Good Studies: 5 points

Good Studies: 4 points

Satisfactory Studies: 3 points

Unsatisfactory Studies: 0 to 2 points

*Cohort / Case control Studies:*

Very Good Studies: 7 to 8 points

Good Studies: 5 to 6 points

Satisfactory: 4 points

Unsatisfactory Studies: 0 to 3 points

## Appendix B

Table 1 Quality Appraisal (Cross-sectional Studies)

|                                                                                           | Cole et al<br>1997 | Dassanaya<br>ke et al<br>2009 | Farahat et<br>al 2003 | Fiedler<br>et al<br>1997 | Korsak et al<br>1977 | Levin et al<br>1976 |
|-------------------------------------------------------------------------------------------|--------------------|-------------------------------|-----------------------|--------------------------|----------------------|---------------------|
| <b>Selection</b>                                                                          |                    |                               |                       |                          |                      |                     |
| 1) Representativeness of the exposed group                                                |                    |                               |                       |                          |                      |                     |
| a) Truly representative of the average farmers or pesticides applicators in the community |                    |                               |                       |                          |                      |                     |
| b) Somewhat representative of the average or pesticides applicators in the community      | a) (+1)            | b) (+1)                       | c) (0)                | a) (+1)                  | b) (+1)              | b) (+1)             |
| c) Selected group of users                                                                |                    |                               |                       |                          |                      |                     |
| d) No description of the derivation of the group                                          |                    |                               |                       |                          |                      |                     |
| 2) Selection of the non exposed group                                                     |                    |                               |                       |                          |                      |                     |
| a) Drawn from the same community as the exposed group                                     | a) (+1)            | b) (0)                        | b) (0)                | a) (+1)                  | a) (+1)              | b) (0)              |
| b) Drawn from a different source                                                          |                    |                               |                       |                          |                      |                     |
| c) No description of the derivation of the non exposed group                              |                    |                               |                       |                          |                      |                     |
| 3) Ascertainment of exposure                                                              |                    |                               |                       |                          |                      |                     |
| a) Secured record (e.g. biomarkers)                                                       |                    |                               |                       |                          |                      |                     |
| b) Structured interview or questionnaire                                                  | b) (+1)            | d) (0)                        | a) (+1)               | b) (+1)                  | a) (+1)              | a) (+1)             |
| c) Written self report                                                                    |                    |                               |                       |                          |                      |                     |
| d) No description                                                                         |                    |                               |                       |                          |                      |                     |
| <b>Confounders</b>                                                                        |                    |                               |                       |                          |                      |                     |
| 1) Comparability of groups on the basis of the design or analysis                         | b) (+1)            | - (0)                         | a) (+1)               | - (0)                    | - (0)                | - (0)               |
| a) Study controls for age and                                                             |                    |                               |                       |                          |                      |                     |

|                                                                                                     |               |                    |                    |          |                  |                  |
|-----------------------------------------------------------------------------------------------------|---------------|--------------------|--------------------|----------|------------------|------------------|
| education                                                                                           |               |                    |                    |          |                  |                  |
| b) Study controls for any additional factor (e.g. alcohol consumption, smoking, and first language) |               |                    |                    |          |                  |                  |
| <b>Outcome</b>                                                                                      |               |                    |                    |          |                  |                  |
| 1) Assessment of outcome                                                                            |               |                    |                    |          |                  |                  |
| a) Independent blind assessment                                                                     | a) (+1)       | b) (+1)            | d) (0)             | b) (+1)  | d) (0)           | a) (+1)          |
| b) Record linkage                                                                                   |               |                    |                    |          |                  |                  |
| c) Self report                                                                                      |               |                    |                    |          |                  |                  |
| d) No description                                                                                   |               |                    |                    |          |                  |                  |
| Overall Score                                                                                       | 5/5 Very Good | 2/5 Unsatisfactory | 2/5 Unsatisfactory | 4/5 Good | 3/5 Satisfactory | 3/5 Satisfactory |

Continued...

Table 1 Continued

|                                                                                           | London et al 1997 | London et al 1998 | Maizish et al 1987 | Rodnitzky et al 1975 | Roldan-Tapia et al 2005 |
|-------------------------------------------------------------------------------------------|-------------------|-------------------|--------------------|----------------------|-------------------------|
| <b>Selection</b>                                                                          |                   |                   |                    |                      |                         |
| 1) Representativeness of the exposed group                                                |                   |                   |                    |                      |                         |
| a) Truly representative of the average farmers or pesticides applicators in the community |                   |                   |                    |                      |                         |
| b) Somewhat representative of the average or pesticides applicators in the community      | b) (+1)           | a) (+1)           | c) (0)             | c) (0)               | a) (+1)                 |
| c) Selected group of users                                                                |                   |                   |                    |                      |                         |
| d) No description of the derivation of the group                                          |                   |                   |                    |                      |                         |
| 2) Selection of the non exposed group                                                     |                   |                   |                    |                      |                         |
| a) Drawn from the same community as the exposed group                                     | a) (+1)           | a) (+1)           | a) (+1)            | c) (0)               | a) (+1)                 |
| b) Drawn from a different source                                                          |                   |                   |                    |                      |                         |
| c) No description of the derivation of the non exposed group                              |                   |                   |                    |                      |                         |

|                                                                                                     |               |          |          |                    |               |
|-----------------------------------------------------------------------------------------------------|---------------|----------|----------|--------------------|---------------|
| 3) Ascertainment of exposure                                                                        |               |          |          |                    |               |
| a) Secured record (e.g. biomarkers)                                                                 |               |          |          |                    |               |
| b) Structured interview or questionnaire                                                            | b) (+1)       | b) (+1)  | a) (+1)  | a) (+1)            | a) (+1)       |
| C) Written self report                                                                              |               |          |          |                    |               |
| d) No description                                                                                   |               |          |          |                    |               |
| <b>Confounder</b>                                                                                   |               |          |          |                    |               |
| 1) Comparability of groups on the basis of the design or analysis                                   |               |          |          |                    |               |
| a) Study controls for age and education                                                             | b) (+1)       | b) (+1)  | b) (+1)  | - (0)              | a) (+1)       |
| b) Study controls for any additional factor (e.g. alcohol consumption, smoking, and first language) |               |          |          |                    |               |
| <b>Outcome</b>                                                                                      |               |          |          |                    |               |
| 1) Assessment of outcome                                                                            |               |          |          |                    |               |
| a) Independent blind assessment                                                                     | b) (+1)       | c) (0)   | a) (+1)  | d) (0)             | a) (+1)       |
| b) Record linkage                                                                                   |               |          |          |                    |               |
| c) Self report                                                                                      |               |          |          |                    |               |
| d) No description                                                                                   |               |          |          |                    |               |
| Overall Score                                                                                       | 5/5 Very Good | 4/5 Good | 4/5 Good | 1/5 Unsatisfactory | 5/5 Very Good |

Continued...

Table1 Continued

|                                                                                           | Rothlein et al 2006 | Srivastava et al 2000 | Steenland et al 2000 | Stephens et al 1995 | Stephens et al 1996 | Stephens et al 2004 |
|-------------------------------------------------------------------------------------------|---------------------|-----------------------|----------------------|---------------------|---------------------|---------------------|
| <b>Selection</b>                                                                          |                     |                       |                      |                     |                     |                     |
| 1) Representativeness of the exposed group                                                |                     |                       |                      |                     |                     |                     |
| a) Truly representative of the average farmers or pesticides applicators in the community | b) (+1)             | c) (0)                | a) (+1)              | a) (+1)             | a) (+1)             | a) (+1)             |
| b) Somewhat representative of the average or pesticides applicators in the community      |                     |                       |                      |                     |                     |                     |
| c) Selected group of users                                                                |                     |                       |                      |                     |                     |                     |
| d) No description of the derivation of the group                                          |                     |                       |                      |                     |                     |                     |



|                                                                                                     |               |                    |               |          |          |          |
|-----------------------------------------------------------------------------------------------------|---------------|--------------------|---------------|----------|----------|----------|
| 2) Selection of the non exposed group                                                               |               |                    |               |          |          |          |
| a) Drawn from the same community as the exposed group                                               | a) (+1)       | a) (+1)            | a) (+1)       | a) (+1)  | a) (+1)  | a) (+1)  |
| b) Drawn from a different source                                                                    |               |                    |               |          |          |          |
| c) No description of the derivation of the non exposed group                                        |               |                    |               |          |          |          |
| 3) Ascertainment of exposure                                                                        |               |                    |               |          |          |          |
| a) Secured record (e.g. biomarkers)                                                                 |               |                    |               |          |          |          |
| b) Structured interview or questionnaire                                                            | b) (+1)       | a) (+1)            | a) (+1)       | c) (0)   | a) (+1)  | b) (+1)  |
| C) Written self report                                                                              |               |                    |               |          |          |          |
| d) No description                                                                                   |               |                    |               |          |          |          |
| <b>Confounder</b>                                                                                   |               |                    |               |          |          |          |
| 1) Comparability of groups on the basis of the design or analysis                                   |               |                    |               |          |          |          |
| a) Study controls for age and education                                                             | a) (+1)       | - (0)              | b) (+1)       | b) (+1)  | b) (+1)  | - (0)    |
| b) Study controls for any additional factor (e.g. alcohol consumption, smoking, and first language) |               |                    |               |          |          |          |
| <b>Outcome</b>                                                                                      |               |                    |               |          |          |          |
| 1) Assessment of outcome                                                                            |               |                    |               |          |          |          |
| a) Independent blind assessment                                                                     | b) (+1)       | d) (0)             | a) (+1)       | b) (+1)  | d) (0)   | b) (+1)  |
| b) Record linkage                                                                                   |               |                    |               |          |          |          |
| c) Self report                                                                                      |               |                    |               |          |          |          |
| d) No description                                                                                   |               |                    |               |          |          |          |
| Overall Score                                                                                       | 5/5 Very good | 2/5 Unsatisfactory | 5/5 Very Good | 4/5 Good | 4/5 Good | 4/5 Good |

Table 2 Quality Appraisal (Cohort Studies)

|                                                                                           | Albers et al<br>2004 | Bazylewicz-Walczak<br>et al 1999 | Daniell et<br>al 1992 | Ohayo-Mitoko et al<br>2000 | Misra et al<br>1985 | Ross et al<br>2010 |
|-------------------------------------------------------------------------------------------|----------------------|----------------------------------|-----------------------|----------------------------|---------------------|--------------------|
| <b>Selection</b>                                                                          |                      |                                  |                       |                            |                     |                    |
| 1) Representativeness of the exposed cohort                                               |                      |                                  |                       |                            |                     |                    |
| a) Truly representative of the average farmers or pesticides applicators in the community |                      |                                  |                       |                            |                     |                    |
| b) Somewhat representative of the average or pesticides applicators in the community      | c) (0)               | c) (0)                           | a) (+1)               | b) (+1)                    | c) (0)              | a) (+1)            |
| c) Selected group of users                                                                |                      |                                  |                       |                            |                     |                    |
| d) No description of the derivation of the cohort                                         |                      |                                  |                       |                            |                     |                    |
| 2) Selection of the non exposed cohort                                                    |                      |                                  |                       |                            |                     |                    |
| a) Drawn from the same community as the exposed cohort                                    |                      |                                  |                       |                            |                     |                    |
| b) Drawn from a different source                                                          | b) (0)               | a) (+1)                          | b) (0)                | a) (+1)                    | b) (0)              | b) (0)             |
| c) No description of the derivation of the non exposed cohort                             |                      |                                  |                       |                            |                     |                    |
| 3) Ascertainment of exposure                                                              |                      |                                  |                       |                            |                     |                    |
| a) Secured record (e.g. biomarkers)                                                       |                      |                                  |                       |                            |                     |                    |
| b) Structured interview or questionnaire                                                  | a) (+1)              | a) (+1)                          | a) (+1)               | b) (+1)                    | a) (+1)             | b) (+1)            |
| c) Written self report                                                                    |                      |                                  |                       |                            |                     |                    |
| d) No description                                                                         |                      |                                  |                       |                            |                     |                    |
| 4) Demonstration that outcome of interest was not present at start of study               |                      |                                  |                       |                            |                     |                    |
| a) Yes                                                                                    | a) (+1)              | a) (+1)                          | a) (+1)               | a) (+1)                    | a) (+1)             | a) (+1)            |
| b) No                                                                                     |                      |                                  |                       |                            |                     |                    |
| <b>Confounders</b>                                                                        |                      |                                  |                       |                            |                     |                    |
| 1) Comparability of groups on the basis of the design or analysis                         |                      |                                  |                       |                            |                     |                    |
| a) Study controls for age and education                                                   | - (0)                | a) (+1)                          | b) (+1)               | - (0)                      | a) (+1)             | a) (+1)            |
| b) Study controls for any additional factor (e.g. alcohol consumption,                    |                      |                                  |                       |                            |                     |                    |

|                              |  |  |  |  |  |  |
|------------------------------|--|--|--|--|--|--|
| smoking, and first language) |  |  |  |  |  |  |
|------------------------------|--|--|--|--|--|--|

Continued...

Table2 Continued

|                                                                                                                                    |                     |             |             |                     |                       |             |
|------------------------------------------------------------------------------------------------------------------------------------|---------------------|-------------|-------------|---------------------|-----------------------|-------------|
| <b>Outcome</b>                                                                                                                     |                     |             |             |                     |                       |             |
| 1) Assessment of outcome                                                                                                           |                     |             |             |                     |                       |             |
| a) Independent blind assessment                                                                                                    | b) (+1)             | d) (0)      | d) (0)      | c) (0)              | d) (0)                | d) (0)      |
| b) Record linkage                                                                                                                  |                     |             |             |                     |                       |             |
| c) Self report                                                                                                                     |                     |             |             |                     |                       |             |
| d) No description                                                                                                                  |                     |             |             |                     |                       |             |
| 2) Was follow-up long enough for outcomes to occur                                                                                 |                     |             |             |                     |                       |             |
| a) Yes (select adequate follow up period for outcome of interest)                                                                  | b) (0)              | b) (0)      | b) (0)      | b) (0)              | b) (0)                | a) (+1)     |
| b) No                                                                                                                              |                     |             |             |                     |                       |             |
| 3) Adequacy of follow up of cohorts                                                                                                |                     |             |             |                     |                       |             |
| a) Complete follow up-all subjects accounted for                                                                                   |                     |             |             |                     |                       |             |
| b) Subjects lost to follow up unlikely to introduce bias- small number lost- >70% follow up, or description provided of those lost | b) (+1)             | a) (+1)     | a) (+1)     | c) (0)              | d) (0)                | d) (0)      |
| c) Follow up rate<70% and no description of those lost                                                                             |                     |             |             |                     |                       |             |
| d) No statement                                                                                                                    |                     |             |             |                     |                       |             |
| Overall Score                                                                                                                      | 4/8<br>Satisfactory | 5/8<br>Good | 5/8<br>Good | 4/8<br>Satisfactory | 3/8<br>Unsatisfactory | 5/8<br>Good |

**Table 3 Quality Appraisal (Case-control Studies)**

| <b>Selection</b>                                                                                                                                                                                                                                  | Beseler et al 2006 |
|---------------------------------------------------------------------------------------------------------------------------------------------------------------------------------------------------------------------------------------------------|--------------------|
| 1) Is the case definition adequate?<br>a) Yes, with independent validation<br>b) Yes, e.g. record linkage or based on self reports<br>C) No description                                                                                           | b) (0)             |
| 2) Representativeness of the cases<br>a) Consecutive or obviously representative series of cases<br>b) Potential for selection biases or not stated                                                                                               | a) (+1)            |
| 3) Selection of Controls<br>a) Community controls<br>b) Hospital controls<br>C) No description                                                                                                                                                    | a) (+1)            |
| 4) Definition of Controls<br>a) No history of disease (endpoint)<br>b) No description of source                                                                                                                                                   | a) (+1)            |
| <b>Confounders</b><br>1) Comparability of cases and controls on the basis of design or analysis<br>a) Study control for age and education<br>b) Study controls for any additional factor                                                          | b) (+1)            |
| <b>Exposure</b><br>1) Ascertainment of exposure<br>a) Secure record(biomarkers)<br>b) Structured interview where blind to case/control status<br>c) Interview not blinded to case/control status<br>d) Written self report or medical record only | d) (0)             |

1  
2  
3  
4  
5  
6  
7  
8  
9  
10  
11  
12  
13  
14  
15  
16  
17  
18  
19  
20  
21  
22  
23  
24  
25  
26  
27  
28  
29  
30  
31  
32  
33  
34  
35  
36  
37  
38  
39  
40  
41  
42  
43  
44  
45  
46  
47  
48  
49  
50  
51  
52  
53  
54  
55  
56  
57  
58  
59  
60

| e) No description | |

Continued...

Table3 Continued

|                                                                                                      |             |
|------------------------------------------------------------------------------------------------------|-------------|
| 2) Same method of ascertainment for cases and controls                                               | a) Yes      |
| a) Yes<br>b) No                                                                                      |             |
| 3) Non-response rate                                                                                 | b) (0)      |
| a) Same rate for both groups<br>b) Non respondents described<br>c) Rate different and no designation |             |
| Overall Score                                                                                        |             |
|                                                                                                      | 5/8<br>Good |

For peer review only

1  
2  
3  
4  
5  
6  
7  
8  
9  
10  
11  
12  
13  
14  
15  
16  
17  
18  
19  
20  
21  
22  
23  
24  
25  
26  
27  
28  
29  
30  
31  
32  
33  
34  
35  
36  
37  
38  
39  
40  
41  
42  
43  
44  
45  
46  
47  
48  
49  
50  
51  
52  
53  
54  
55  
56  
57  
58  
59  
60

For peer review only

| MOOSE Checklist                   |                                                                                                                                                                                                                                                                 |       |
|-----------------------------------|-----------------------------------------------------------------------------------------------------------------------------------------------------------------------------------------------------------------------------------------------------------------|-------|
| Section/Topic                     | Checklist items                                                                                                                                                                                                                                                 | Check |
| <b>Title</b>                      | • Identify the study as a meta-analysis (or systematic review)                                                                                                                                                                                                  | X     |
| <b>Abstract</b>                   | • Use the journal's structured format                                                                                                                                                                                                                           | X     |
| <b>Introduction (Present)</b>     | • The clinical problem                                                                                                                                                                                                                                          | X     |
|                                   | • The hypothesis                                                                                                                                                                                                                                                | X     |
|                                   | • A statement of objectives that includes the study population, the condition of interest, the exposure or intervention, and the outcome(s) considered                                                                                                          | X     |
| <b>Sources (Describe)</b>         | • Qualifications of searchers (eg, librarians and investigators)                                                                                                                                                                                                | X     |
|                                   | • Search strategy, including time period included in the synthesis and keywords                                                                                                                                                                                 | X     |
|                                   | • Effort to include all available studies, including contact with authors                                                                                                                                                                                       | X     |
|                                   | • Databases and registries searched                                                                                                                                                                                                                             | X     |
|                                   | • Search software used, name and version, including special features used (eg, explosion)                                                                                                                                                                       | X     |
|                                   | • Use of hand searching (eg, reference lists of obtained articles)                                                                                                                                                                                              | X     |
|                                   | • List of citations located and those excluded, including justification                                                                                                                                                                                         | X     |
|                                   | • Method of addressing articles published in languages other than English                                                                                                                                                                                       | X     |
| <b>Study Selection (Describe)</b> | • Method of handling abstracts and unpublished studies                                                                                                                                                                                                          | X     |
|                                   | • Description of any contact with authors                                                                                                                                                                                                                       | X     |
|                                   | • Types of study designs considered                                                                                                                                                                                                                             | X     |
|                                   | • Relevance or appropriateness of studies gathered for assessing the hypothesis to be tested                                                                                                                                                                    | X     |
|                                   | • Rationale for the selection and coding of data (eg, sound clinical principles or convenience)                                                                                                                                                                 | X     |
|                                   | • Documentation of how data were classified and coded (eg, multiple raters, blinding, and interrater reliability)                                                                                                                                               | X     |
|                                   | • Assessment of confounding (eg, comparability of cases and controls in studies where appropriate)                                                                                                                                                              | X     |
|                                   | • Assessment of study quality, including blinding of quality assessors; stratification or regression on possible predictors of study results                                                                                                                    | X     |
| <b>Results (Present)</b>          | • Assessment of heterogeneity                                                                                                                                                                                                                                   | N/A   |
|                                   | • Statistical methods (eg, complete description of fixed or random effects models, justification of whether the chosen models account for predictors of study results, dose-response models, or cumulative meta-analysis) in sufficient detail to be replicated | N/A   |
|                                   | • A graph summarizing individual study estimates and the overall estimate                                                                                                                                                                                       | X     |
|                                   | • A table giving descriptive information for each included study                                                                                                                                                                                                | X     |
|                                   | • Results of sensitivity testing (eg, subgroup analysis)                                                                                                                                                                                                        | X     |
|                                   | • Indication of statistical uncertainty of findings                                                                                                                                                                                                             | X     |
| <b>Discussion (Discuss)</b>       | • Strengths and weaknesses                                                                                                                                                                                                                                      | X     |
|                                   | • Potential biases in the review process (eg, publication bias)                                                                                                                                                                                                 | X     |
|                                   | • Justification for exclusion (eg, exclusion of non-English-language citations)                                                                                                                                                                                 | X     |
|                                   | • Assessment of quality of included studies                                                                                                                                                                                                                     | X     |
|                                   | • Consideration of alternative explanations for observed results                                                                                                                                                                                                | X     |
|                                   | • Generalization of the conclusions (ie, appropriate for the data presented and within the domain of the literature review)                                                                                                                                     | X     |
|                                   | • Guidelines for future research                                                                                                                                                                                                                                | X     |
|                                   | • Disclosure of funding source                                                                                                                                                                                                                                  | X     |

N/A: Not Applicable

# BMJ Open

## A systematic review of the influence of occupational organophosphate pesticides exposure on neurologic impairment

|                                 |                                                                                                                                                                                             |
|---------------------------------|---------------------------------------------------------------------------------------------------------------------------------------------------------------------------------------------|
| Journal:                        | <i>BMJ Open</i>                                                                                                                                                                             |
| Manuscript ID:                  | bmjopen-2014-004798.R2                                                                                                                                                                      |
| Article Type:                   | Research                                                                                                                                                                                    |
| Date Submitted by the Author:   | 25-May-2014                                                                                                                                                                                 |
| Complete List of Authors:       | Takahashi, Noriko; Institute of Tropical Medicine, Nagasaki University, Pediatric infectious diseases<br>Hashizume, Masahiro; Institute of Tropical Medicine, Pediatric Infectious Diseases |
| <b>Primary Subject Heading</b>: | Epidemiology                                                                                                                                                                                |
| Secondary Subject Heading:      | Public health                                                                                                                                                                               |
| Keywords:                       | Epidemiology < TROPICAL MEDICINE, Public health < INFECTIOUS DISEASES, Environmental Health                                                                                                 |
|                                 |                                                                                                                                                                                             |

SCHOLARONE™  
Manuscripts



1  
2  
3  
4 Title: A systematic review of the influence of occupational organophosphate pesticides exposure on  
5  
6 neurologic impairment  
7

8  
9  
10 Authors:

11  
12 Noriko Takahashi

13  
14 Masahiro Hashizume

15  
16  
17  
18 Authors' Institutions:

19  
20 Department of Pediatric Infectious Diseases, Institute of Tropical Medicine, Nagasaki University,  
21  
22 1-12-4 Sakamoto, Nagasaki 852-8523, Japan  
23  
24

25  
26  
27 Address for correspondence:

28  
29 Noriko Takahashi

30  
31 Department of Pediatric Infectious Diseases, Institute of Tropical Medicine, Nagasaki University  
32  
33 1-12-4 Sakamoto, Nagasaki 852-8523, Japan  
34  
35

36  
37  
38 Tel: (+81) 95 819 7764 Fax: (+81) 95 819 7844

39  
40  
41 E-mail: [pediatric.nagasaki@gmail.com](mailto:pediatric.nagasaki@gmail.com)

42  
43  
44 Key words: Organophosphate, Pesticides, Central Nervous System, Neurologic, Impairment

45  
46  
47 Word count, main text: 4173

48  
49  
50 Number of Tables/Illustrations: 4

51  
52  
53 Number of References: 41

## ABSTRACT

**Objective:** The aim of this study was to conduct a systematic review of published literature and to estimate whether or not there is a causal relationship between occupational exposure to Organophosphate pesticides (OPs) and either neurologic impairment or depressive symptoms.

**Data sources:** EMBASE, MEDLINE, Global Health, and PsycINFO (1980 to April 2014).

**Setting:** Observational studies (cross-sectional, cohort, and case-control studies) with both exposed and unexposed groups.

**Participants:** People who occupationally use OPs more than one month and their family.

**Primary outcome:** Results of neurological core test batteries or depressive symptoms such as headaches, anxiety, and dizziness.

**Study appraisal and synthesis methods:** After an extensive search of various literature databases, one author screened titles and abstracts, searched the relevant publications manually, and conducted data extraction. All extracted data from the selected articles were synthesized for analysis. Quality appraisal was conducted using Newcastle Ottawa Scale.

**Results:** Of the 1024 articles retrieved by database search, 24 studies that met inclusion and exclusion criteria were selected for analysis. Of the selected studies, 17 were cross-sectional and the remaining seven were cohort and nested case-control studies. The geographical areas included in the studies were USA (10 studies), UK (four studies), Africa (four studies), Asia (three studies), Europe (two studies), and South America (one study). Each of the included studies used different exposure

1  
2  
3  
4 and outcome assessments such as neurologic scores and depressive symptoms, making it difficult to  
5  
6  
7 compare the results exactly. Most studies showed that exposed groups had poorer results than  
8  
9  
10 unexposed groups; however, because of inconsistent neurological test batteries there was not enough  
11  
12  
13 pooling evidence to conduct a meta-analysis.

14  
15 **Conclusion:** The findings of this literature review indicate that it is a necessary to standardize the  
16  
17  
18 neurological or neuropsychological test battery and methods of measuring exposure to OPs.  
19

20  
21 **Trial registration:** Not applicable.  
22  
23  
24  
25  
26  
27  
28  
29  
30  
31  
32  
33  
34  
35  
36  
37  
38  
39  
40  
41  
42  
43  
44  
45  
46  
47  
48  
49  
50  
51  
52  
53  
54  
55  
56  
57  
58  
59  
60

## ARTICLE SUMMARY

### Article Focus

- To systematically review epidemiological studies that examine adverse effects on the human central nervous system (CNS) by exposure to organophosphate pesticides (OPs).

### Key messages

- OPs have been used widely all over the world for agricultural or industrial use.
- Many studies have examined acute health problems caused by OPs; however, few studies have investigated negative effects caused by occupational OPs exposure.

### Strengths and limitations of this study

- The article represents a systematic review of epidemiological studies on adverse effects on the human CNS by occupational OPs exposure, with a quality appraisal of each study.
- The article identifies problematic issues of exposure and outcome assessments.
- Meta-analysis could not be applied because only a small number of pooled studies were available.
- In some studies it was difficult to judge negative effects caused only by OPs, because mixed pesticides were used.

## INTRODUCTION

Ever since organophosphate pesticides (OPs) were developed, they have been used to combat insects for public health purposes and to support agricultural productivity and manufacturing processes. Because pesticides are also one of the leading suicide methods, a large number of epidemiological studies have investigated the relationship between high level OPs exposure such as pesticide poisoning and accidents and acute health effects. It has been reported that high level OPs exposure is significantly related to neurological or neuropsychological impairment (1, 2). In contrast, few studies have reported associations between occupational or cumulative OPs exposure and negative effects on human health, although some research has examined the negative influence on young children of cumulative OPs exposure (3, 4) and others have investigated relationships between reproductive health and occupational OPs exposure (5-7). High level OPs exposure are known to have adverse effects on the human CNS, therefore, occupational or cumulative OPs exposure also has the potential to negatively affect the CNS. However, very few epidemiological studies that have assessed the relationships between occupational OPs exposure and neurologic or mental problems have been published. The objective of this systematic review is to verify whether or not occupational OPs exposure negatively affects the human CNS. To investigate this further, we summarized the epidemiological evidence for the relationship between occupational OPs exposure and mental and neuropsychological aggression, especially for occupational OP users, and some of the limitations associated with the various studies are discussed.

## MATERIALS AND METHODS

### Searching strategy for identification of published studies

We searched the published literature using the OvidSP search software (8) to select relevant observational studies. A geographical restriction was not imposed; however, the search was restricted to studies published from 1980 to 2014. Population-based case-control studies were excluded from the systematic review because it was difficult to assess accurate exposure doses for these studies. Because various pesticides including OPs are currently easily available to everyone, it is highly likely that these pesticides have been obtained for personal use. For this reason, it is almost impossible to obtain past records of pesticide use by every individual. The literature search was limited to studies in humans and to reports published in English, and the review was limited to epidemiological studies. Moreover, unpublished studies and grey literature (literature that has not been formally published) were not searched in this systematic review; therefore we did not contact authors to find unpublished studies. Studies investigating OPs exposure through food and water contamination were also excluded. A search of the following four databases was carried out: EMBASE Classic + EMBASE (1980 to Week13 2014); Ovid MEDLINE(R) (1980 to Week13 2014); Global Health (1980 to Week12 2014); and PsycINFO (1980 to Week14 2014).

A combination of free-text terms and explore terms was used to identify relevant articles. For exposure, the following search keywords were used: organophosphate\*, organophosphorous,

1  
2  
3  
4 pesticide\*, or insecticide\*, and organophosphate pesticide (explore map term). For outcome, the  
5  
6  
7 following search keywords were used: neuro\*, psychiatr\*, psycholog\*, mental health, mental illness,  
8  
9  
10 mental disorder, or depressi\*, depression (explore map term), and mental health (explore map term).  
11  
12 For subjects, the following search keywords were used: occupation\*, agricultu\*, or farm\*. For study  
13  
14 design, the following search keywords were used: epidemiolog\*, cohort, cross-sectional, or  
15  
16 case-control, and epidemiology (explore map term). An initial systematic search in the titles and  
17  
18 abstracts was conducted using a combination of all these search terms. A second manual search of  
19  
20 the reference lists from the selected relevant articles was performed to explore or retrieve articles  
21  
22 found in the initial search in order to find as many available studies as possible.  
23  
24  
25  
26  
27  
28  
29  
30  
31  
32

### 33 **Criteria for selecting studies for review**

34  
35 Only original research articles meeting the inclusion and exclusion criteria described below were  
36  
37 used in the final review.  
38  
39  
40  
41  
42  
43

#### 44 Inclusion criteria:

##### 45 46 47 1. Study design

- 48  
49  
50 a) Must be observational studies: cross-sectional, cohort, and case-control studies.  
51  
52  
53 b) Studies must have both exposed and unexposed groups.  
54

##### 55 56 2. Subjects

1  
2  
3  
4 a) The subjects in the exposed group either must use OPs occupationally, or there must be a  
5  
6  
7 probability of being exposed to OPs during their work.

8  
9  
10 b) The families of occupational OP users can be treated as subjects.

### 11 12 3. Exposure

13  
14  
15 a) Subjects must be exposed to OPs for at least one month.

16  
17  
18 b) Seasonal workers who used OPs for more than one month must be included.

### 19 20 21 4. Outcome

22  
23  
24 Studies must have carried out some tests to assess damage to the CNS or have conducted a survey  
25  
26  
27 or an interview to identify depressive symptoms.

### 28 29 30 5. Exposure-outcome association

31  
32  
33 Results must be reported as some types of relative risks or mean scores.

### 34 35 36 37 38 Exclusion criteria:

#### 39 40 41 1. Study design

42  
43  
44 Experimental and laboratory based studies including animal studies were excluded.

45  
46  
47 Population-based case-control studies were excluded.

#### 48 49 50 2. Subjects

51  
52  
53 Studies of mainly patients of pesticide poisoning were excluded.

#### 54 55 56 3. Exposure



1  
2  
3  
4 Studies that did not specify the type of pesticides were excluded.  
5  
6

7 4. Outcome  
8

9  
10 Studies examining damage of the peripheral nervous system due to OPs exposure were excluded.  
11

12  
13 5. Language  
14

15  
16 Studies published in a language other than English were excluded.  
17  
18  
19  
20

21 **Definitions used for the review**  
22

23  
24 *Definition of cumulative exposure*  
25

26  
27 a) People who used OPs in their jobs for at least one month and had the probability of inhaling  
28  
29 ambient OPs and absorbing OPs by spraying and touching.  
30  
31

32  
33 b) Families of OP users were included as subjects because they may have been exposed to OPs by  
34  
35 washing clothes contaminated by OPs and/or by touching OP users.  
36  
37

38  
39 *Definition of poor mental health*  
40

41 A) Neurological or neuropsychological impairment  
42

43  
44 a) People who had poorer results in neurological or neuropsychological test batteries than healthy  
45  
46 people of the same age.  
47  
48

49  
50 b) People who had short-memory loss; for example, people who had experienced memory loss of  
51  
52 six to three months duration.  
53  
54

55  
56 B) Depressive Symptom  
57  
58

1  
2  
3  
4 c) People who, regardless of their age, had chronic depressive symptoms including headache,  
5  
6  
7 fatigue, dizziness, sleepless, and eye problems.

8  
9  
10 d) People who were diagnosed with depression by clinical doctors.  
11

### 12 13 14 15 **Study selection process** 16

17  
18 Using the search terms listed above, a total of 1024 references were obtained: 515 from EMBASE  
19  
20 Classic + EMBASE, 31 from PsycINFO, 196 from Global Health, and 282 from Ovid MEDLINE(R)  
21  
22 (Figure1). However, 77 animal studies, 90 studies not in English studies, and 12 studies that did not  
23  
24 meet the time restrictions were excluded. Of the remaining 845 studies, 516 were excluded because  
25  
26 of duplications. A manual search of the titles and abstracts of the remaining 329 references excluded  
27  
28 a further 272 studies. The 21 remaining articles were fully reviewed, after which 12 studies were  
29  
30 deemed to meet inclusion and exclusion criteria (9-20). In addition, 12 articles identified by the  
31  
32 manual search were added to the systematic review (Figure1). To include as many relevant studies as  
33  
34 possible, studies published before 1980 that were found by the manual search were included to the  
35  
36 list for review. Finally, these 24 studies were selected for data extraction (9-32).  
37  
38  
39  
40  
41  
42  
43  
44  
45  
46  
47  
48  
49

### 50 **Data extraction, synthesis, and analysis** 51

52  
53 Data extraction forms were created to compare relevant data collected from each of the 24 studies.  
54  
55  
56 The following data were extracted to assess heterogeneity of the included studies: title, authors, year  
57  
58  
59  
60

1  
2  
3  
4 published, number of subjects in the exposed and unexposed groups, occupation, and demographic  
5  
6  
7 information such as mean age, sex, smoking status, and geographical area. In addition, the following  
8  
9  
10 data were extracted to assess confounding factors and statistical models among the included studies:  
11  
12  
13 inclusion and exclusion criteria such as first language, alcohol consumption, injury experience,  
14  
15  
16 confounding factors, and statistical methods used. The following data were extracted to assess  
17  
18  
19 exposure and outcomes: types of pesticides, exposure assessment, and outcome assessment to  
20  
21  
22 measure the neurologic or neuropsychological ability, and results obtained. Tables containing the  
23  
24  
25 data that were obtained using the data extraction forms were constructed and analyzed. P-values and  
26  
27  
28 95% confidence intervals (95% CIs) were elicited from the articles to judge statistical uncertainty.  
29  
30  
31 When a study had investigated depressive symptoms, the information was collected and a table was  
32  
33  
34 constructed. Impact and statistical magnitude of depressive symptoms were represented using plus or  
35  
36  
37 minus signs ‘++’, ‘+’, and ‘-’, based on the P-value or 95%CI of the studies. All data extraction,  
38  
39  
40 coding, and quality appraisal were conducted only by the first author; therefore, no disagreement  
41  
42  
43 events occurred.  
44  
45  
46

### 47 **Quality appraisal**

48  
49  
50 The quality of the 24 studies was appraised using a scale adapted from the ‘Newcastle/Ottawa Scale  
51  
52  
53 (NOS)’(33) (The appraisal standard of NOS is shown in Appendix A). Based on the NOS, each study  
54  
55  
56 was evaluated using the point system. When a study included relevant information that could be  
57  
58  
59  
60

1  
2  
3  
4 associated to the NOS, one point was added. Five items in cross-sectional studies and eight items in  
5  
6 cohort and case-control studies that could be related to the NOS were identified. Therefore,  
7  
8 cross-sectional studies assigned 5, 4, 3, or 0–2 points were evaluated as very good, good, satisfactory,  
9  
10 or unsatisfactory studies, respectively. Similarly, cohort/case-control studies with 7–8, 5–6, 4, and  
11  
12 0–3 points were identified as very good, good, satisfactory, or unsatisfactory, respectively.  
13  
14  
15  
16  
17  
18  
19  
20

## 21 **RESULTS**

22  
23  
24 As a result of the search strategy described in the Materials and Methods section, 12 studies were  
25  
26 identified from the database search and another 12 studies were found after a manual search. These  
27  
28 24 articles, published between 1975 and 2010, met all the inclusion and exclusion criteria. A  
29  
30 summary of the characteristics of the 24 selected articles is shown in Table 1.  
31  
32  
33  
34  
35  
36  
37  
38

### 39 **Study design and geographical area**

40  
41 Of the selected studies, 17 were cross-sectional and the remaining seven were cohort and nested  
42  
43 case-control studies. The geographical areas included in the studies were USA (10 studies), UK (four  
44  
45 studies), Africa (four studies; two in South Africa, one in Egypt, and one in Kenya), Asia (three  
46  
47 studies; two in India and one in Sri Lanka), Europe (two studies; one in Spain and one in Poland),  
48  
49 and South America (one study; Ecuador).  
50  
51  
52  
53  
54  
55  
56  
57  
58  
59  
60

### Characteristics of subjects

Because the subjects were limited to people who had the probability of being occupationally exposed by OPs, the majority of the participants (60–70%) were men. Most of the time, agricultural work such as pesticide application and farming is performed predominantly by men. Six of the 24 studies included both male and female subjects (9, 11, 17, 25, 27, 32), and only one study used all female subjects in both the exposed and control groups (21). In 13 of the studies the mean age of the exposed subjects was in the 30s, in six studies the mean age was in the 40s (9, 14, 15, 19, 20, 31), and in two studies the mean age was in the 50s (13, 17). The mean age in two studies was 29, very close to thirty (25, 32). One of the studies did not report detailed demographic data of the participants (10).

### Source of recruitment and sample size

Ten out of the 24 studies were on pesticide applicators including private, commercial, and tree, fruit, and vegetable applicators. Five and three studies were on farmers and sheep farmers, respectively, and two studies were on factory workers and greenhouse workers. One study investigated depressive symptoms in the spouses of OPs users. In the study by Korsak et al. (22), the specific occupation of the population in the study was not stated, however, the subjects had experienced occupational OPs exposure. The number of subjects in the exposed groups varied from 16 to 2,051, while the control groups had a wider range of subjects (16 to 27,023).

Table 1 Findings reported in epidemiological studies into occupational low level OPs exposure and mental illness

|    | Author                        | Study Design | Country      | Exposed Population(No)                                                  | Chemical       | Exposed Assessment              | Comparison Group                                                              |
|----|-------------------------------|--------------|--------------|-------------------------------------------------------------------------|----------------|---------------------------------|-------------------------------------------------------------------------------|
| 1  | Albers et al (9)              | CO           | USA          | Chemical workers(53)                                                    | OP             | Industrial HR,AChE INH          | Similar workers, not exposed(60)                                              |
| 2  | Bazylewicz-Walczak et al (21) | CO           | Poland       | Greenhouse workers(26)                                                  | OP             | DR                              | Greenhouse workers, not exposed(25)                                           |
| 3  | Beseler et al (10)*           | NC/ CO       | USA          | Case**: Spouses of private applicators with depressive diagnoses(2,051) | OP             | QU or IN                        | Control: Spouses of private applicators without depressive diagnoses (27,023) |
| 4  | Cole et al (11)               | CR           | Ecuador      | Farmers, some applicators(144)                                          | OP,CAR,<br>FNG | IN, QU, AChE INH                | Local Population(72)                                                          |
| 5  | Daniell et al (12)            | CO           | USA          | Farm worker applicators(49)                                             | OP             | QU, AChE INH                    | Slaughterhouse workers(40)                                                    |
| 6  | Dassanayake et al (13)        | CR           | Sri Lanka    | Vegetable farm workers (38)                                             | OP             | N.A.                            | hospital labours(35)                                                          |
| 7  | Farahat et al (14)            | CR           | Egypt        | Farm workers(52)                                                        | OP             | AChE INH                        | Local Population(50)                                                          |
| 8  | Fiedler et al (15)            | CR           | USA          | Tree fruit farmers (57)                                                 | OP             | QU, lifetime exposure<br>metric | Cranbury/blueberry growers(low exposed), hardware storeowners(unexposed) (42) |
| 9  | Korsak et al (22)             | CR           | USA          | Occupational exposure(16)                                               | OP,<br>OC      | CAR, AChE INH                   | Local Population(low exposure)(16)                                            |
| 10 | Levin et al (23)*             | CR           | USA          | Pesticide applicators(24)                                               | OP             | IN, AChE INH                    | Farmers(24)                                                                   |
| 11 | London et al (16)             | CR           | South Africa | Fruit farm pesticide applicators(163)                                   | OP             | QU(job-matrix)                  | Farm workers, not applicators(84)                                             |
| 12 | London et al(24)*             | CR           | South Africa | Fruit farm pesticide applicators(164)                                   | OP             | QU (job-matrix)                 | Farm workers, not applicators(83)                                             |
| 13 | Maizlish et al (25)           | CR           | USA          | Pesticide applicators(46)                                               | OP             | UM, DR                          | Non-applicators(56)                                                           |
| 14 | Misra et al (26)*             | PR           | India        | Pesticide applicators(22)                                               | OP             | AChE INH                        | Hospital labours(20)                                                          |

1  
2  
3  
4  
5  
6  
7  
8  
9  
10  
11  
12  
13  
14  
15  
16  
17  
18  
19  
20  
21  
22  
23  
24  
25  
26  
27  
28  
29  
30  
31  
32  
33  
34  
35  
36  
37  
38  
39  
40  
41  
42  
43  
44  
45  
46  
47  
48  
49

|    |                          |    |       |                              |         |                |                                            |
|----|--------------------------|----|-------|------------------------------|---------|----------------|--------------------------------------------|
| 15 | Ohayo-Mitoko et al (27)* | CO | Kenya | Farm worker applicators(256) | OP, CAR | AChE INH       | Farm workers(low exposure)(152)            |
| 16 | Rodnitzky et al (28)     | CR | USA   | Pesticide applicators(23)    | OP      | AChE INH       | Farmers(23)                                |
| 17 | Roldan-Tapia et al (18)  | CR | Spain | Greenhouse workers(40)       | OP, CAR | QU, AChE INH   | Local Population(26)                       |
| 18 | Ross et al (17)          | CO | UK    | Sheep farmers(127)           | OP      | IN             | Police workers(78)                         |
| 19 | Rothlein et al(32)       | CR | USA   | Farm workers(96)             | OP      | UM, House dust | Workers in hotels and tourist industry(45) |
| 20 | Srivastava et al(29)     | CR | India | Manufacture workers(59)      | OP      | AChE INH       | Manufacture workers, not exposed(17)       |
| 21 | Steenland et al(30)      | CR | USA   | Termiticide applicators(191) | OP      | IN,UM          | Friends, blue collar workers(189)          |
| 22 | Stephens et al (19)      | CR | UK    | Sheep farmers(146)           | OP      | QU             | Quarry workers(143)                        |
| 23 | Stephens et al (31)      | CR | UK    | Sheep farmers(77)            | OP      | QU, UM         | Quarry workers(69)                         |
| 24 | Stephens et al (20)      | CR | UK    | Orchard applicators(37)      | OP      | IN,QU          | Construction workers,pig farmers(57)       |

Study Design CR: Cross-sectional, CO: Cohort, NC: Nested case-control, PR: Prospective study

Chemical OP: Organophosphates, OC: Organochlorines, CAR: Carbamates, FUN: Fungicides, AChE: Acetylcholinesterase

Exposed Assessment AChE INH: AChE inhibition, DR: Dermal and respiratory absorption, IN: Interview , QU: Questionnaire , HR: Hygiene records UM: Urinary metabolites

\*Studies that included depressive symptoms for outcome assessments.

\*\*Cases were defined as female spouses of private applicators who responded 'yes' to the question "Has a DOCTOR ever told you that you had been diagnosed with depression requiring medication?" Controls were female spouses who responded 'no' (10).

## Exposure assessment

Exposure assessment in the included studies could be divided, for the most part, into five patterns: indirect assessment using, for example, an interview or questionnaire; direct assessment including a measurement of urinary metabolites and acetylcholinesterase (AChE) levels in the blood or a measurement of ambient OPs using a patch and a pump; combination of direct and indirect methods; combination of a biomarker and OPs exposure levels included in house dust; and combination of biomarkers and ambient OP levels. Seven of the 24 studies used indirect methods, and six studies used blood AChE inhibition levels to measure AChE levels in the blood as an exposure indicator. Six studies used a combination of indirect methods and biomarkers, three studies used biomarkers and the ambient OP levels, one study used a biomarker and house dust. The remaining study did not mention any exposure assessment methods. In all the studies that used urinary metabolites as exposure assessment, the results were presented as the sum of dialkylphosphates (DAP) (i.e. the sum of six DAP metabolites: DMP (dimethylphosphate), DMTP (dimethylthiophosphate), DMDTP (dimethyldithiophosphate), DEP (diethylphosphate), DETP (diethylthiophosphate), and DEDTP (diethyldithiophosphate)) (25, 30-32).



### Outcome measurements

Two different outcome measurements were used in the studies; one measured neurological impairment and the other assessed depressive symptoms. Of the 24 studies, 19 used cognitive function tests to investigate negative neurologic influences caused by OPs exposure.

### Associations between outcome and exposure

Ten of the 19 studies that investigated cognitive impairment mentioned that at least one measure outcome showed more impairment in the exposed groups; however, these observations were not significant ( $P < 0.05$ ). Seven of the studies reported some significant positive associations of exposure with poor outcome ( $P < 0.05$ ); however, even in these cases, the significant decrements were observed only in some of the neurologic tests, mainly in the Digit Span and Santa Ana Dexterity tests. Indeed, there are several versions of these neurologic tests and the significance of the scores often depended on the versions of the tests that were used. Five studies used the Wechsler Adult Intelligence Scale (WAIS or WAIS-R) (34, 35), four studies used the Neurobehavioral Evaluation System (NES) (36), two studies used the World Health Organization Neurobehavioral Core Test Battery (NCTB) (37, 38), and the remaining

eight studies used their own scales.

Five studies adopted depressive symptoms as outcome measurements, as shown in Table2; however, the symptoms used in the studies were not standardized.

Table2 Summary of depressive symptoms used as outcome measurements

| Reference                      | Results obtained                                                                                                                                                                                                                                   | Impact of outcomes |
|--------------------------------|----------------------------------------------------------------------------------------------------------------------------------------------------------------------------------------------------------------------------------------------------|--------------------|
| Beseler et al<br>2006(10)      | Depression due to doctor's diagnosis was not significantly related to low (OR 1.09; 95%CI 0.91, 1.31) or high (OR 1.09; 95%CI 0.91, 1.31) cumulative exposure.                                                                                     | -                  |
| Levin et al<br>1976(23)        | Anxiety score of the pesticide applicators was significantly higher (P<0.05) than that of the farmers. However, there was no significant difference in measures of depression.                                                                     | ++                 |
| London et al<br>1998(24)       | Dizziness, sleepiness, and headache had a significantly higher overall neurological symptom score (P<0.05).                                                                                                                                        | ++                 |
| Misra et al<br>1985(26)        | Common symptoms were Headache (59%), giddiness (50%), ocular symptoms (27%), and paresthesia (18%) and no neurologic change was seen.                                                                                                              | -                  |
| Ohayo-Mitoko et al<br>2000(27) | A significant change in symptom prevalence was found for the respiratory (2.48% CI (0.78, 5.38) and central nervous system (2.56% CI (0.99, 6.62), but in terms of skin symptoms, and eye symptoms, there was no statistically significant change. | ++                 |

OR=Odds Ratio ++: Statistically significant (P<0.05), -: Not statistically significant

### Statistical analysis

Sixteen studies used logistic regression, and the remaining eight used other statistical tests including X<sup>2</sup>-test and t-test. Only one study adjusted for sex in the logistic

1  
2  
3  
4  
5  
6 regression. Fourteen of the 24 studies adjusted for age, and 12 adjusted for education in  
7  
8  
9 the statistical analysis. However, only five studies adjusted for alcohol consumption  
10  
11  
12 before carrying out the statistical analysis, and only two studies adjusted for first  
13  
14  
15 language.

### 20 **Methodological quality appraisal**

21  
22  
23 Based on NOS, five of the 24 studies were of very good quality, 10 were of good  
24  
25  
26 quality, and the remaining nine were either satisfactory or unsatisfactory. Most studies  
27  
28  
29 with unsatisfactory scores either were carried out before 1990 or were performed in  
30  
31  
32 some of the less developed countries. In particular, the methods of recruitment of  
33  
34  
35 subjects, controlling for confounders, and outcome assessment were not appropriate.  
36  
37  
38 For example, in some studies, all of the participants were volunteers (14, 28) and in  
39  
40  
41 another study, the subjects were not representative of the community from which they  
42  
43  
44 were recruited (factory workers) (29). In addition, in the unsatisfactory studies, how the  
45  
46  
47 outcome was assessed was not described, and methods needed to avoid confounders  
48  
49  
50 such as stratification and regression were not used. None of the cohort studies were  
51  
52  
53 assessed as very good quality because most of them did not have a long enough  
54  
55  
56 follow-up duration (in five studies, the duration was less than six months) and the  
57  
58  
59  
60

1  
2  
3  
4  
5  
6 selected subjects were not fully representative of the target community. Moreover, the  
7  
8  
9 methods of outcome assessment were not described in most of the cohort studies.  
10

### 11 12 13 14 15 **Data synthesis** 16

17  
18 The results of the neurologic tests used in the studies are summarized in Table3. As can  
19  
20 be seen, the test batteries differed from study to study. The commonly used test batteries  
21  
22 in NCTB, NES, and WAIS were Symbol-Digit and Digit Span Forward and Backward.  
23  
24 However, some studies that adopted NES and WAIS to measure neurologic impairment  
25  
26 implemented only a few subsets in the trials. Among the 13 studies that used a  
27  
28 Symbol-Digit test, four used NES and unknown tests, two used WAIS and WAIS-R, and  
29  
30 one used a Polish NCTB. Among the studies that used Digit Span Forward and  
31  
32 Backward tests, some studies performed both tests, while the others did only one of the  
33  
34 tests as shown in Table3. Overall, only four of the studies used the same test battery in  
35  
36 NES and WAIS. Although three studies apparently used the same scoring systems, one  
37  
38 of the scores was completely different from the scores in the other two studies. For  
39  
40 example, the scores in the study by Stephens et al. (31) were 24.22 and 21.01 in the  
41  
42 exposed and the control groups respectively, whereas the scores reported by Daniell et  
43  
44 al. and Stephens et al. were much lower and between 2.23 and 3.55 (12, 20). Similarly,  
45  
46  
47  
48  
49  
50  
51  
52  
53  
54  
55  
56  
57  
58  
59  
60

the mean scores reported by Bazylewicz-Walczak et al. (21) were higher, 45.50 and 49.40, while the mean scores reported in the other studies were smaller, 2.28 and 2.23 in the WAIS (25). In consideration of insufficient number of studies and possible systematic differences in the population characteristics and/or in the measurement procedures between the studies, we decided not to conduct a meta-analysis.

Table3 Summary of the neurologic test batteries used in some of the studies

| Reference                         | Types of neurologic tests       | Symbol Digit     | Digit Span                                                       | Santa Ana | Simple Reaction Time | Syntactic Reasoning(s) |
|-----------------------------------|---------------------------------|------------------|------------------------------------------------------------------|-----------|----------------------|------------------------|
| Bazylewicz-Walczak et al 1999(21) | Polish NCTB/WAIS (Symbol Degit) | nd               | nd                                                               | nd        | **                   | nd                     |
| Cole et al 1997(11)               | NCTB                            | nm               | nm                                                               | nm        | nd                   | nd                     |
| Daniell et al 1992(12)            | NES                             | *                | nd                                                               | nd        | nd                   | nd                     |
| Farahat et al 2003(14)            | Unknown                         | ***              | *** <sup>(f)<sup>1</sup></sup><br>*** <sup>(b)<sup>2</sup></sup> | nd        | nd                   | nd                     |
| Fiedler et al 1997(15)            | WAIS-R                          | *                | *                                                                | nd        | ***                  | nd                     |
| London et al 1997(16)             | WAIS-R                          | nm               | nm                                                               | ***       | nm                   | nd                     |
| Maizlish et al 1987(25)           | WAIS                            | ***              | nd                                                               | nd        | nd                   | nd                     |
| Roldan-Tapia et al 2005(18)       | WAIS                            | *** <sup>3</sup> | *** <sup>3</sup>                                                 | nd        | nd                   | nd                     |
| Ross et al 2010(17)               | WAIS                            | nd               | ***                                                              | nd        | nd                   | nd                     |
| Rothlein et al 2006(32)           | Unknown                         | *                | * <sup>(f)<sup>1</sup></sup><br>*** <sup>(b)<sup>2</sup></sup>   | nd        | *                    | nd                     |
| Srivastava et al 2000(29)         | Unknown                         | ***              | ***                                                              | nd        | nd                   | nd                     |
| Steenland et al 2000(30)          | NES                             | *                | *                                                                | nd        | *                    | nd                     |
| Stephens et al 1995(19)           | Unknown                         | ***              | *                                                                | nd        | ***                  | **                     |
| Stephens et al 1996(31)           | NES/ACT                         | nm               | nm                                                               | nd        | nm                   | nm                     |

---

|                        |         |   |   |    |   |     |
|------------------------|---------|---|---|----|---|-----|
| Stephens et al 2004(1) | NES/ACT | * | * | nd | * | *** |
|------------------------|---------|---|---|----|---|-----|

---

(ACTS)

\*\*\*P<0.05, \*\*0.05≤P<0.1, \*P>0.1

The exposed groups were slower or had poorer outcomes than the control groups

<sup>1</sup>(f) Digit Span Forward

<sup>2</sup>(b) Digit Span Backward

<sup>3</sup>Whether the obtained results were positive or negative was not reported in the study.

nd: Subsets of neurological tests were not performed.

nm: Subsets of neurological tests were performed but P-values were not reported.

## DISCUSSION

The systematic keyword and manual searches of the published literature identified 24 epidemiological studies that examined the relationship between OPs and CNS. When the relevant information was assessed, two main findings were obtained, one was the method of exposure assessment, and the other was the method used for the outcome measurement. For exposure assessment, the measurement methods were categorized as direct, indirect, and a combination of direct and indirect. For the outcome measurements, two main assessments were used, neurologic impairment and depressive symptoms.

### Exposure assessment

Exposure assessment was not used for group allocation in all the studies; rather, it was implemented to measure how much subjects were exposed and the outcomes of the neurobehavioral tests. Different exposure assessment methods were used in each study,

1  
2  
3  
4  
5  
6 which made it difficult to accurately compare the studies. In addition, there seemed to  
7  
8  
9 be methodological imperfections in both the direct and indirect methods. For example,  
10  
11  
12 in one study, an interview and questionnaire were used for recruited subjects over 60  
13  
14 years old who had been retired for 11 years (17). This method is subject to recall bias  
15  
16 because the rate of cognitive impairment is likely to have increased as the subjects aged.  
17  
18 However, other indirect methods, especially extensive history records of pesticide use  
19  
20 could be considered as a proxy of how much OPs might have accumulated in the body,  
21  
22 thus records of this type can be used to estimate the amount of OPs by long-term  
23  
24 exposure, even though there may be some recall bias. For the direct methods, DPA or  
25  
26 urinary metabolites was used as an exposure index in the study; however, DPA is  
27  
28 metabolized rapidly and excreted (6). On the contrary, blood AChE levels take  
29  
30 approximately one week to become normal (39); hence, although blood AChE levels  
31  
32 cannot be used to assess the accumulation of OPs in body tissues over a long time, it  
33  
34 can be used to assess short-term exposure. To minimize measurement errors, a mixed  
35  
36 method for the assessment of short-term and long-term exposure should be established.  
37  
38  
39  
40  
41  
42  
43  
44  
45  
46  
47  
48  
49  
50  
51

### 52 **Outcome assessment**

53  
54  
55 The main problem in analyzing the outcome measurements was the inconsistencies in  
56  
57  
58  
59  
60

1  
2  
3  
4  
5  
6 neurologic test batteries. Various versions of the neurologic tests were used in the  
7  
8  
9 studies and the content of the tests differ slightly in each study (Table3). Therefore, only  
10  
11  
12 a few tests were common across some of the studies, which made it difficult to compare  
13  
14  
15 the studies. Further, a meta-analysis could not be applied because of the insufficient  
16  
17  
18 number of studies. Meta-analysis could have been performed by dividing the results into  
19  
20  
21 subgroups; however, the results could be highly misleading because of loss of power  
22  
23  
24 (40). In terms of depressive symptoms, the outcome assessment was again different in  
25  
26  
27 each study. For instance, one study used the proportion of headaches, while another  
28  
29  
30 used dizziness and sleepiness as the main outcomes. To gain better insights into whether  
31  
32  
33 occupational OP exposure can negatively affect the human CNS, at the very least,  
34  
35  
36 neurologic test batteries should be standardized and guidelines for measuring of  
37  
38  
39 neurologic symptoms should be set for all future epidemiological studies. Furthermore,  
40  
41  
42 although some studies mentioned the possible relationship between OPs exposure and  
43  
44  
45 confounding factors such as age and education, statistical tests between the exposed and  
46  
47  
48 control groups were not performed in these studies. These inconsistencies make it  
49  
50  
51 difficult to compare the neurologic impairment outcomes among the studies.  
52  
53  
54

### 55 **Study design**

56  
57  
58  
59  
60



1  
2  
3  
4  
5  
6 Although 17 of 24 studies were cross-sectional studies, longitudinal or cohort studies  
7  
8  
9 are more appropriate, because agricultural work using pesticides is easily influenced by  
10  
11  
12 seasonality. One research regarding reproductive health by OPs exposure stated that  
13  
14  
15 sperm concentration and counts are negatively affected in spring, peak season, rather  
16  
17  
18 than winter (5). Therefore, the effect on the CNS could also be affected by seasonality.  
19

### 20 21 22 23 **Sources of possible biases** 24

25  
26 Only published studies written in English were searched, thus publication bias could  
27  
28  
29 have occurred. In future studies, non-English studies and unpublished studies should be  
30  
31  
32 included to reduce publication bias. In trials that included foreign workers, first  
33  
34  
35 language and education levels could be considered as possible biases because there is a  
36  
37  
38 possibility that non-native subjects did not fully understand the content and instructions  
39  
40  
41 for the tests, which could lead to them obtaining a lower score than native speakers.  
42  
43  
44 Additionally, the education systems in developed and less developed countries could be  
45  
46  
47 very different. Nowadays, developed countries such as USA and the Gulf countries have  
48  
49  
50 accepted foreign workers as an important part of the workforce (12, 32, 41). These  
51  
52  
53 factors needed to be adjusted carefully in the sampling and analytical stages of the  
54  
55  
56 study; however, only two of the selected studies mentioned first language in their  
57  
58  
59  
60

1  
2  
3  
4  
5  
6 statistical analyses (12, 31). Occupation could also contribute to selection bias because,  
7  
8  
9 for example, a police officer or a construction worker would have a higher probability  
10  
11  
12 of experiencing loss of consciousness due to accidents than workers with different  
13  
14  
15 occupations (17).  
16

### 20 **Possible confounders**

21  
22  
23 Apart from common confounders such as age and education, head injury and alcohol  
24  
25  
26 consumption could be other confounders, because they can cause neurologic  
27  
28  
29 impairment due to memory deterioration. Although some of the studies adjusted for  
30  
31  
32 alcohol consumption in the analysis (10, 12, 16, 24, 25), no study adjusted for head  
33  
34  
35 injury. Furthermore, nutrition status including vitamin deficiency can also be relevant to  
36  
37  
38 the outcome of neuropsychological tests (16, 24). Thus, factors other than the common  
39  
40  
41 confounders that could negatively affect cognitive function should be adjusted for in the  
42  
43  
44 analysis.  
45  
46  
47  
48

### 49 **Strengths and limitations of this review**

50  
51  
52 A major strength of this systematic review is that the characteristics of the selected  
53  
54  
55 studies were summarized using tables, and limitations of the exposure and outcome  
56  
57  
58  
59  
60

1  
2  
3  
4  
5  
6 assessments used in these studies were identified mainly on the basis of the constructed  
7  
8  
9 tables. Furthermore, the systematic review allowed us to propose recommendations that  
10  
11  
12 will be useful for standardizing future epidemiological research.  
13

14  
15 All of the selected studies were relevant to occupational OPs exposure; however, some  
16  
17 of them included other pesticides such as carbamates, fungicides, and herbicides.  
18  
19 Pesticides that are commonly used in agriculture are usually mixtures of different  
20  
21 pesticides, which are used to increase their effect. Four of the 24 selected studies used a  
22  
23 combination of OPs, organochlorines, carbamates, and fungicide; hence, the effect of  
24  
25 only occupational OPs exposure could not be measured in these studies. In the outcome  
26  
27 assessments, different neurological types of tests were used, consequently, the lack of  
28  
29 pooling evidence meant that a meta-analysis could not be performed. Furthermore, the  
30  
31 exclusion of studies written in languages other than English is another limitation of this  
32  
33 review, and literature retrieval by only the first author could have introduced some bias  
34  
35 into the selection of the studies.  
36  
37  
38  
39  
40  
41  
42  
43  
44  
45  
46  
47  
48

## 49 **CONCLUSION**

50  
51  
52 The items tested in the neurological or neuropsychological test batteries, and the  
53  
54 estimates of OPs exposure were inconsistent because they depended on the preferences  
55  
56  
57  
58  
59  
60

1  
2  
3  
4  
5  
6 of the investigators. For future studies, it would be best to standardize the neurological  
7  
8  
9 and neuropsychological test types, test batteries, and the methods used to measure OPs,  
10  
11  
12 to enable precise comparisons of results and pooling of evidence from a large number of  
13  
14  
15 studies for future analyses. However, this may be difficult to achieve in practice because  
16  
17  
18 OPs are used in differing settings around the world, and education systems vary  
19  
20  
21 considerably between countries.  
22  
23  
24  
25

## 26 **ACKNOWLEDGMENT**

27  
28  
29 We thank Professor Ben Armstrong for his insightful comments on our paper.  
30  
31  
32  
33  
34

## 35 **FOOTNOTES**

36  
37  
38 **Contributors** NT conceived the study design and participated in protocol development,  
39  
40  
41 literature searching, data extraction, data analysis, and drafted the manuscript. MH  
42  
43  
44 critically reviewed the draft and contributed to the manuscript revisions.  
45

46  
47 **Funding** No specific grant was obtained from any public funding agency for this  
48  
49  
50 research.  
51

52  
53 **Competing interests** None.  
54

55  
56 **Ethical approval** Systematic review.  
57  
58  
59  
60

**Provenance and peer review** Not commissioned, externally peer reviewed.

**Data sharing statement** No additional data are available.

## REFERENCES

1. Steenland K, Jenkins B, Ames RG, et al. Chronic neurological sequelae to organophosphate pesticide poisoning. *American journal of public health*. 1994;84(5):731-6. Epub 1994/05/01.
2. Moretto A, Lotti M. Poisoning by organophosphorus insecticides and sensory neuropathy. *Journal of neurology, neurosurgery, and psychiatry*. 1998;64(4):463-8. Epub 1998/05/12.
3. Rohlman DS, Arcury TA, Quandt SA, et al. Neurobehavioral performance in preschool children from agricultural and non-agricultural communities in Oregon and North Carolina. *Neurotoxicology*. 2005;26(4):589-98. Epub 2005/08/23.
4. Rastogi SK, Tripathi S, Ravishanker D. A study of neurologic symptoms on exposure to organophosphate pesticides in the children of agricultural workers. *Indian journal of occupational and environmental medicine*. 2010;14(2):54-7. Epub 2010/12/02.
5. Recio-Vega R, Ocampo-Gomez G, Borja-Aburto VH, et al. Organophosphorus pesticide exposure decreases sperm quality: association between sperm parameters and urinary pesticide levels. *J Appl Toxicol*. 2008;28(5):674-80. Epub 2007/11/30.
6. Yucra S, Gasco M, Rubio J, et al. Semen quality in Peruvian pesticide applicators: association between urinary organophosphate metabolites and semen parameters. *Environ Health-Glob*. 2008;7:-.
7. Yucra S, Rubio J, Gasco M, et al. Semen quality and reproductive sex hormone levels in Peruvian pesticide sprayers. *Int J Occup Env Heal*. 2006;12(4):355-61.
8. Ovid Technologies I. Ovid SP. (access date: 2014 23 April) Available from: <http://gateway.ovid.com/>.
9. Albers JW, Berent S, Garabrant DH, et al. The effects of occupational exposure to chlorpyrifos on the neurologic examination of central nervous system function: a prospective cohort study. *J Occup Environ Med*. 2004;46(4):367-78. Epub 2004/04/13.
10. Beseler C, Stallones L, Hoppin JA, et al. Depression and pesticide exposures in female spouses of licensed pesticide applicators in the agricultural health study cohort. *J Occup Environ Med*. 2006;48(10):1005-13. Epub 2006/10/13.

11. Cole DC, Carpio F, Julian J, et al. Neurobehavioral outcomes among farm and nonfarm rural Ecuadorians. *Neurotoxicology and Teratology*. 1997;19(4):277-86.
12. Daniell W, Barnhart S, Demers P, et al. Neuropsychological Performance among Agricultural Pesticide Applicators. *Environ Res*. 1992;59(1):217-28.
13. Dassanayake T, Gawarammana IB, Weerasinghe V, et al. Auditory event-related potential changes in chronic occupational exposure to organophosphate pesticides. *Clin Neurophysiol*. 2009;120(9):1693-8. Epub 2009/08/18.
14. Farahat TM, Abdelrasoul GM, Amr MM, et al. Neurobehavioural effects among workers occupationally exposed to organophosphorous pesticides. *Occup Environ Med*. 2003;60(4):279-86.
15. Fiedler N, Kipen H, KellyMcNeil K, et al. Long-term use of organophosphates and neuropsychological performance. *Am J Ind Med*. 1997;32(5):487-96.
16. London L, Myers JE, Nell V, et al. An investigation into neurologic and neurobehavioral effects of long-term agrichemical use among deciduous fruit farm workers in the Western Cape, South Africa. *Environ Res*. 1997;73(1-2):132-45.
17. Mackenzie Ross SJ, Brewin CR, Curran HV, et al. Neuropsychological and psychiatric functioning in sheep farmers exposed to low levels of organophosphate pesticides. *Neurotoxicol Teratol*. 2010;32(4):452-9. Epub 2010/03/17.
18. Roldan-Tapia L, Parron T, Sanchez-Santed F. Neuropsychological effects of long-term exposure to organophosphate pesticides. *Neurotoxicol Teratol*. 2005;27(2):259-66. Epub 2005/03/01.
19. Stephens R, Spurgeon A, Calvert IA, et al. Neuropsychological effects of long-term exposure to organophosphates in sheep dip. *Lancet*. 1995;345(8958):1135-9. Epub 1995/05/06.
20. Stephens R, Sreenivasan B. Neuropsychological effects of long-term low-level organophosphate exposure in orchard sprayers in England. *Arch Environ Health*. 2004;59(11):566-74.
21. Bazylewicz-Walczak B, Majczakowa W, Szymczak M. Behavioral effects of occupational exposure to organophosphorous pesticides in female greenhouse planting workers. *Neurotoxicology*. 1999;20(5):819-26.
22. Korsak RJ, Sato MM. Effects of chronic organophosphate pesticide exposure on the central nervous system. *Clin Toxicol*. 1977;11(1):83-95. Epub 1977/01/01.
23. Levin HS, Rodnitzky RL, Mick DL. Anxiety associated with exposure to organophosphate compounds. *Arch Gen Psychiatry*. 1976;33(2):225-8. Epub 1976/02/01.
24. London L, Nell V, Thompson ML, et al. Effects of long-term organophosphate exposures on neurological symptoms, vibration sense and tremor among South African farm

- workers. *Scand J Work Env Hea*. 1998;24(1):18-29.
25. Maizlish N, Schenker M, Weisskopf C, et al. A behavioral evaluation of pest control workers with short-term, low-level exposure to the organophosphate diazinon. *Am J Ind Med*. 1987;12(2):153-72. Epub 1987/01/01.
26. Misra UK, Nag D, Bhushan V, et al. Clinical and biochemical changes in chronically exposed organophosphate workers. *Toxicol Lett*. 1985;24(2-3):187-93. Epub 1985/02/01.
27. Ohayo-Mitoko GJ, Kromhout H, Simwa JM, et al. Self reported symptoms and inhibition of acetylcholinesterase activity among Kenyan agricultural workers. *Occup Environ Med*. 2000;57(3):195-200. Epub 2000/05/16.
28. Rodnitzky RL. Occupational exposure to organophosphate pesticides: a neurobehavioral study. *Arch Environ Health*. 1975;30(2):98-103. Epub 1975/02/01.
29. Srivastava AK, Gupta BN, Bihari V, et al. Clinical, biochemical and neurobehavioural studies of workers engaged in the manufacture of quinalphos. *Food Chem Toxicol*. 2000;38(1):65-9.
30. Steenland K, Dick RB, Howell RJ, et al. Neurologic function among termiticide applicators exposed to chlorpyrifos. *Environ Health Persp*. 2000;108(4):293-300.
31. Stephens R, Spurgeon A, Berry H. Organophosphates: the relationship between chronic and acute exposure effects. *Neurotoxicology and teratology*. 1996;18(4):449-53.
32. Rothlein J, Rohlman D, Lasarev M, et al. Organophosphate pesticide exposure and neurobehavioral performance in agricultural and non-agricultural Hispanic workers. *Environ Health Perspect*. 2006;114(5):691-6. Epub 2006/05/06.
33. Institute OHR. The Newcastle-Ottawa Scale (NOS) for assessing the quality of nonrandomised studies in meta-analyses. (access date: 2014 26 April) Available from: [http://www.ohri.ca/programs/clinical\\_epidemiology/oxford.asp](http://www.ohri.ca/programs/clinical_epidemiology/oxford.asp).
34. Wechsler D. Manual for the Wechsler Adult Intelligence Scale. New York: Psychological corporation; 1955: pp1- 110.
35. Wechsler D. Manual for the Wechsler Adult Intelligence Scale-Revised. New York: Psychological corporation; 1981: pp1-156.
36. Baker EL, Letz RE, Fidler AT, et al. A computer-based neurobehavioral evaluation system for occupational and environmental epidemiology: methodology and validation studies. *Neurobehavioral toxicology and teratology*. 1985;7(4):369-77. Epub 1985/07/01.
37. B.L. Johnson ME, C. Xintaras, E.L. Baker, et al. Seppalainen. Prevention of neurotoxic illness in working populations. London: John Willey & Sons; 1987: pp1-274.
38. Anger WK. Neurobehavioural tests and systems to assess neurotoxic exposures in the workplace and community. *Occup Environ Med*. 2003;60(7):531-8, 474. Epub 2003/06/24.

- 1  
2  
3  
4  
5  
6  
7  
8  
9  
10  
11  
12  
13  
14  
15  
16  
17  
18  
19  
20  
21  
22  
23  
24  
25  
26  
27  
28  
29  
30  
31  
32  
33  
34  
35  
36  
37  
38  
39  
40  
41  
42  
43  
44  
45  
46  
47  
48  
49  
50  
51  
52  
53  
54  
55  
56  
57  
58  
59  
60
39. Ngowi AV, Maeda DN, Partanen TJ, et al. Acute health effects of organophosphorus pesticides on Tanzanian small-scale coffee growers. *J Expo Anal Environ Epidemiol*. 2001;11(4):335-9. Epub 2001/09/26.
40. Higgins JP, Thompson SG, Deeks JJ, et al. Measuring inconsistency in meta-analyses. *BMJ*. 2003;327(7414):557-60. Epub 2003/09/06.
41. Gomes J, Lloyd O, Revitt MD, et al. Morbidity among farm workers in a desert country in relation to long-term exposure to pesticides. *Scand J Work Env Hea*. 1998;24(3):213-9.

## FIGURE LEGEND

Figure 1: Flow diagram of search and review process



1  
2  
3  
4  
5  
6  
7  
8 Title: A systematic review of the influence of occupational organophosphate pesticides exposure on  
9  
10 neurologic impairment

Formatted: No underline

11  
12 Authors:

Formatted: No underline

13  
14  
15 Noriko Takahashi<sup>+</sup>

16  
17 Masahiro Hashizume<sup>+</sup>

18  
19  
20 Authors' Institutions:

21  
22  
23 <sup>+</sup>Department of Pediatric Infectious Diseases, Institute of Tropical Medicine, Nagasaki University,  
24  
25 1-12-4 Sakamoto, ~~Nagasaki City~~, Nagasaki, 852-8523, Japan

26  
27  
28 Address for correspondence:

Formatted: No underline

29  
30 Noriko ~~Takahashi~~~~Furuoya~~

31  
32 Department of Pediatric Infectious Diseases, Institute of Tropical Medicine, Nagasaki University

33  
34 1-12-4 Sakamoto, ~~Nagasaki City~~, Nagasaki 852-8523, Japan

35  
36  
37 Tel: (+81) 95 819 7764 Fax: (+81) 95 819 7844

38  
39  
40 E-mail: [pediatric.nagasaki@furuoyanoriko@gmail.com](mailto:pediatric.nagasaki@furuoyanoriko@gmail.com)

41  
42 Key words: Organophosphate, Pesticides, Central Nervous System, Neurologic, Impairment

43  
44  
45 Word count, main text: 41~~7323~~

46  
47 Number of Tables/Illustrations: ~~434~~

48  
49  
50 Number of References: ~~413478~~

**ABSTRACT**

**Background:** ~~Organophosphate pesticides (OPs) are widely used widely; however, only a few epidemiological studies have investigated the association between neurological behavioral or neuropsychological effects and occupational OP exposure.~~

**Objective:** The aim of this study was to conduct a systematic review ~~of the~~ published literatures and to estimate whether or not there is a causal relationship between occupational exposure to Organophosphate pesticides (OPs) and either neurologic impairment or depressive symptoms.

**Data sources:** EMBASE, MEDLINE, Global Health, and PsycINFO (1980 to April 2014).

**Setting:** Observational studies (cross-sectional, cohort, and case-control studies) with both exposed and unexposed groups.

**Participants:** People who occupationally use OPs more than one month and their family.

**Primary outcome:** Results of neurological core test batteries or depressive symptoms such as headaches, anxiety, and dizziness.

**Study appraisal and synthesis methods****Method:** After A an extensive search of various literature databases, one author screened titles and abstracts, searched the relevant publications manually, and conducted data extraction. was conducted, and the relevant publications were then manually searched manually. All the relevant data were extracted data from the selected articles were and synthesized for analysis. Quality appraisal was conducted using Newcastle Ottawa Scale.

Meta-analysis was implemented using mean scores of the neurologic tests and depressive symptoms.

Formatted: Font: Bold

Formatted: Font: Bold

Formatted: Font: Bold

1  
2  
3  
4  
5  
6  
7  
8 **Results:** Of the 1024 articles retrieved by database search, 24~~Twenty three~~ studies that met inclusion  
9  
10 and exclusion criteria were selected for analysis. Of the selected studies, 17~~6~~ were cross-sectional  
11  
12 and the remaining seven were cohort and nested case-control studies. The geographical areas  
13  
14 included in the studies were USA (10~~nine~~ studies), UK (four studies), Africa (four studies), Asia  
15  
16 (three studies), Europe (two studies), and ~~one in~~ South America (one study). ~~E~~~~The~~ ~~Each~~ ~~of~~ ~~the~~  
17  
18 included studies used different exposure and outcome assessments such as neurologic scores and  
19  
20 depressive symptoms, ~~thus~~ making it difficult to compare the results exactly. ~~The~~ ~~m~~ Most studies  
21  
22 showed that ~~the~~ exposed groups had poorer results than ~~the~~ unexposed groups; ~~;~~ however, because of  
23  
24 inconsistent neurological test batteries there was not enough pooling evidence to conduct a  
25  
26 meta-analysis ~~evidence based on the results of the meta-analysis was weak.~~  
27  
28  
29  
30  
31

32 **Conclusion:** The findings of this literature review indicate that there is a necessary~~necessity~~ to  
33  
34 standardize the neurological~~behavioral~~ or neuropsychological test battery and methods of measuring  
35  
36 OPs exposure to OPs.  
37  
38

39  
40 **Trial registration:** Not applicable.  
41  
42  
43  
44  
45  
46  
47  
48  
49  
50  
51  
52  
53  
54  
55  
56  
57  
58  
59  
60

Formatted: Font: Bold

1  
2  
3  
4  
5  
6  
7  
8 ~~there might be a causal relationship between occupational exposure to OPs and neurological~~  
9 ~~impairment or depressive symptoms.~~  
10  
11  
12  
13

## ARTICLE SUMMARY

### Article Focus

- To systematically review epidemiological studies ~~that~~which examine adverse effects on the human central nervous system (CNS) by exposure to organophosphate pesticides (OPs).

### Key messages

- OPs have been ~~widely~~ used widely all over the world for agricultural or industrial use.
- ~~Many There are a plenty of~~ studies ~~have~~which have examined acute health problems caused by OPs; however, few studies have investigated negative effects caused by occupational OPs exposure.

### Strengths and limitations of this study

- The article represents a systematic review of epidemiological studies on adverse effects on the human ~~central nervous system~~CNS by occupational OPs exposure, with a quality appraisal of each study.
- The article identifies problematic issues of exposure and outcome assessments.
- ~~M~~The meta-analysis was limited because each study used various outcome assessmentscould not be applied ~~due to~~because only a small number of the pooled studies were available.

1  
2  
3  
4  
5  
6  
7  
8  
9  
10  
11  
12  
13  
14  
15  
16  
17  
18  
19  
20  
21  
22  
23  
24  
25  
26  
27  
28  
29  
30  
31  
32  
33  
34  
35  
36  
37  
38  
39  
40  
41  
42  
43  
44  
45  
46  
47  
48  
49  
50  
51  
52  
53  
54  
55  
56  
57  
58  
59  
60

- ~~In some studies. There it is was a~~ difficulty to judge negative effects ~~caused by~~ only ~~by~~ OPs, because mixed pesticides were used ~~in some studies.~~

For peer review only

## INTRODUCTION

Ever since organophosphate pesticides (OPs) were developed, they have been used ~~to~~for combating insects for public health purposes and to support agricultural productivity and manufacturing processes. ~~Since~~Because Pesticides are also ~~well-known as~~ one of the leading suicide methods, ~~and approximately three million cases of pesticide poisoning occur every year around the world. This is especially prevalent in Asian nations including Sri Lanka, China, and Malaysia (1). For this reason,~~ a large number of epidemiological studies have investigated the relationship between high level OPs exposure such as pesticide poisoning and accidents and acute health effects~~(1, 2), and~~ ~~it~~ has been reported that high level OPs exposure is significantly related to neurological or neuropsychological impairment~~(1, 2)~~~~((1, 2)2, 3)~~. In contrast, few studies~~that~~ have ~~report~~investigated associations between occupational or cumulative OPs exposure and negative effects on human health~~are available, even although.~~ ~~Although~~ some research has examined the negative influence ~~on~~to young children ~~of~~by cumulative OPs exposure (3, 4)~~((3, 4)4, 5)~~ ~~and~~ others have investigated relationships between reproductive health and occupational OPs exposure~~(5-7)~~~~((5-7)6-8)~~; ~~Since~~ ~~h~~High levels OPs exposure ~~provides~~are known to have adverse effects on the human CNS~~central nervous system~~, ~~therefore, occupational or cumulative OPs exposure~~ ~~has~~ also has the potential to negatively affect the CNS~~it~~. However, ~~there are~~ very few epidemiological studies ~~that~~which have assessed the relationships between occupational OPs exposure and neurologic or mental problems have been published~~using epidemiological research~~. The objective of this systematic review is to verify

1  
2  
3  
4  
5  
6  
7  
8 ~~whether or not occupational OPs exposure could negatively affects influence on the human central~~  
9 ~~nervous system CNS. In this systematic review~~ To investigate this further test the hypothesis, we  
10 summarized the epidemiological evidence for the relationship between occupational OPs exposure  
11 and mental and neuropsychological aggression, especially for occupational OP users, is summarized,  
12 and and some of the limitations associated with the various studies are discussed.

## 23 MATERIALS AND METHODS

### 25 Searching strategy for identification of published studies

26  
27  
28  
29  
30 ~~A~~ We searched the published literature for observational studies was carried out using the Ovid  
31 SP(8), a search software (8) to select relevant observational studies, by the author. A Ggeographical  
32 and time restrictions were was not imposed; however, the search a published period was restricted to  
33 studies published from 1980 to 2014 Current. Population-based case-control studies were excluded  
34 from the systematic review because it was is difficult to assess accurate exposure doses for these  
35 studies. Because Currently, various pesticides including OPs, currently, are currently easily -available  
36 to for everyone, -and some people have ait is possibility highly likely that -of using these pesticides  
37 have been obtained for personal use. However For this reason, it is almost impossible to comprehend  
38 exactly obtain past records of pesticides use by every person individual. The literature search was  
39 limited to studies in humans and to reports published in English, and the review was limited to

epidemiological studies. ~~Moreover, unpublished studies and grey literature (literature that has not been formally published)s~~ were not searched in this systematic review; ~~therefore we did not make a contact with any authors to find out unpublished studies.~~ Studies investigating OP<sub>s</sub> exposure through food and water contamination were also excluded. A search of the following four databases was carried out:

1. ~~EMBASE Classic~~ ~~plus~~ EMBASE (1980~~47~~ to ~~201~~Week13 20140 July 09);~~;~~
2. ~~Ovid MEDLINE(R)~~ (1985~~0~~ to ~~June~~ Week 5 2010~~March~~ Week 13 4 2014);~~;~~
3. ~~Global Health~~ (1980~~10~~ to ~~June~~ 2010~~Week~~12 2014);~~;~~ and
4. ~~PsycINFO~~ (1980~~806~~ to ~~July~~ Week 1 2010~~April~~ Week 14 2014).

~~A combination of free-text terms and explore terms was used to identify relevant articles. For exposure, the following search keywords were used: organophosphate\*, organophosphorous, pesticide\*, ~~or~~ insecticide\*, and organophosphate pesticide (explore map term); ~~pesticide (explore map term).~~ For outcome, the following search keywords were used: neuro\*, psychiatr\*, psycholog\*, mental health, mental illness, mental disorder, ~~or~~ depressi\*, depression (~~Epidemiology~~) (explore map term), and mental health (explore map term). For subjects, the following search keywords were used: occupation\*, agricultu\*, or farm\*. For study design, the following search keywords were used: epidemiolog\*, cohort, ~~or~~ cross-sectional, ~~or~~ case-control, ~~and~~ ~~or~~ ~~E~~epidemiology (explore map term) ~~were used as keywords.~~ An initial systematic search in the titles and abstracts was conducted using a combination of all these search terms. A second manual search of the~~

Formatted: Indent: First line: 0.5 ch



1  
2  
3  
4  
5  
6  
7  
8 reference lists from the selected relevant articles was performed to explore or retrieve articles found  
9  
10 in the initial search in order to find out as many available studies to the extent as possible.  
11  
12  
13

#### 14 15 **Criteria for selecting studies for ~~the~~ review** 16

17 Only original research articles meeting the inclusion and exclusion criteria described below were  
18  
19 used in the final review~~result~~.  
20  
21  
22  
23

#### 24 25 Inclusion criteria: 26

##### 27 28 1. ~~Study design:~~ 29

- 30 a) Must be observational studies: cross-sectional, cohort, and case-control studies.  
31  
32 b) Studies must have both exposed and unexposed groups.  
33

##### 34 35 2. ~~Subjects:~~ 36

- 37 a) The subjects in the exposed group either must use OPs occupationally, or there must be a  
38 probability of being exposed to OPs during their work.  
39  
40 b) The families of occupational OP users can be treated as subjects.  
41  
42  
43

##### 44 45 3. ~~Exposure:~~ 46

- 47 a) Subjects must be exposed to OPs for at least one month.  
48  
49 b) Seasonal workers who used OPs for more than one month must be included.  
50  
51

##### 52 53 4. ~~Outcome:~~ 54

1  
2  
3  
4  
5  
6  
7  
8 Studies must have carried out some tests to assess damage ~~to~~of the CNS (~~Central Nervous System~~)  
9  
10 or have conducted a survey or an interview to identify depressive symptoms.  
11

12  
13 5. ~~-~~Exposure-outcome association

14  
15 Results must be reported as some ~~type~~s of relative risks or mean scores.  
16  
17

18  
19  
20 Exclusion criteria:

21  
22 1. Study design

23  
24 Experimental and laboratory based studies including animal studies were excluded.  
25  
26

27  
28 Population-based case-control studies were excluded.  
29

30 2. Subjects

31  
32 Studies of mainly patients of pesticide poisoning were ~~not~~ excluded.  
33  
34

35 3. Exposure

36  
37 Studies ~~that~~which did not specify the type of pesticides were excluded.  
38  
39

40 4. Outcome

41  
42 Studies examining damage of the peripheral nervous system due to OPs exposure were excluded.  
43  
44

45 5. Language

46  
47 Studies published in a language other than English were excluded.  
48  
49

50  
51  
52 **Definitions used for the review**

Formatted: Font: Bold, Italic

***Definition of cumulative exposure***

- a) People who used OPs in their jobs for at least one month and had the probability of inhaling ambient OPs and absorbing OPs by spraying and touching.
- b) Families of OP users were included as subjects, because they may have been exposed to OPs by washing clothes contaminated by OPs and/or by touching OP users.

Formatted: Font: Bold, Italic

***Definition of poor mental health***

A) Neurological or neuropsychological impairment

- a) People who had poorer results in neurological or neuropsychological test batteries than healthy people of the same age.
- b) People who had short-memory loss; for example, people who had experienced memory loss of six to three months duration.

B) Depressive Symptom

- c) People who, regardless of their age, had chronic depressive symptoms including headache, fatigue, dizziness, sleepless, and eye problems.
- d) People who were diagnosed with depression by clinical doctors.

**Study selection process**

Using the search terms listed above, a total of 1024592 references were obtained: 515276 from EMBASE Classic + EMBASE, 3146 from PsycINFO, 196133 from Global Health, and

1  
2  
3  
4  
5  
6  
7  
8 ~~282167~~ from ~~Ovid MEDLINE(R)edline (Figure1)~~. However, ~~77 animal studies, were excluded~~  
9  
10 ~~because they were not appropriate to test the hypothesis of this review. Furthermore, 90 studies~~  
11 ~~were not in English studies, and 12 studies that did not meet were removed due to the time~~  
12 ~~restrictions were excluded. Of the remaining 845 studies, 516197 of 845592 references were~~  
13 ~~excluded due to because of -duplicationses. Of these 395 unique references that remained, 63 were~~  
14 ~~not in English, and 32 were animal studies.~~ A manual search of the titles and abstracts of the  
15 remaining 32900 references excluded a further 272268 studies. The 2132 remaining articles were  
16 fully reviewed, after which 132 studies were deemed to meet inclusion and exclusion criteria (9-20)  
17 (8-20)(8-20)9-21). In addition, 120 articles identified by the manual search were added to the  
18 systematic review (Figure1See Appendix A for flow of study inclusion and exclusion diagram). To  
19 include as many relevant studies as possible, studies published before 1980 that were found by the  
20 manual search were included to the list for review. Finally, these 243 studies were identifiedselected  
21 and used for data extraction (9-32)(21)(8-31), ((8, 11, 13, 15, 19, 21-38)22-31).

### 42 Data extraction, synthesis, and analysis

43  
44 Data extraction forms were created to compare relevant data collected from each of the 243 studies.  
45  
46 The following data ~~were~~ extracted to assess heterogeneity of the included studies ~~as basic~~  
47 ~~data.~~ Extracted data included title, authors, year published, ~~and the~~ number of subjects in the  
48 exposed and unexposed groups, occupation, and demographic information such as mean age, sex,  
49  
50  
51  
52  
53

1  
2  
3  
4  
5  
6  
7  
8 smoking status, ~~and~~ geographical area. ~~In addition to basic data, the following data were~~ extracted  
9  
10 ~~to assess confounding factors and statistical models among the included studies:~~ inclusion and  
11  
12 exclusion criteria such as first language, alcohol consumption, ~~and~~ injury experience, ~~confounding~~  
13  
14 ~~factors, and statistical methods used.~~ The following data ~~were~~ extracted to assess exposure and  
15  
16 ~~outcomes assessment:~~ types of pesticides, exposure assessment, ~~and~~ ~~statistical methods,~~ outcome  
17  
18 assessment to measure the neurologic or neuropsychological ability, and results obtained. Tables  
19  
20 containing the data that ~~were~~ obtained using the data extraction forms were constructed ~~–~~ and  
21  
22 analyzed. ~~–~~ P-values and 95% ~~percent~~ confidence intervals (95% CIs) were elicited from the articles  
23  
24  
25  
26  
27 to judge statistical uncertainty. When a study had investigated depressive symptoms, the information  
28  
29 was collected and a table was constructed. Impact and statistical magnitude of depressive symptoms  
30  
31 were represented using plus or minus signs including ‘++’, ‘+’, and ‘–’, based on the P-value or  
32  
33 95%CI of the studies. Meta-analysis was carried out using mean scores of neuropsychological tests  
34  
35 with STATA version 11.0. All data extraction, coding, and quality appraisal were conducted ~~only by~~  
36  
37 ~~only by the first author;~~ therefore, ~~no events in–~~ disagreement events were not occurred.

### Quality appraisal

46  
47 The quality of the 243 studies was appraised using a scale ~~that was~~ adapted from the  
48  
49 ‘Newcastle/Ottawa Scale (NOS)’ (33) ~~(32)~~ (The appraisal standard of NOS ~~is~~ was shown in Appendix  
50  
51 ~~A~~ B). Based on the NOS, each study was evaluated using the point system. When a study included

1  
2  
3  
4  
5  
6  
7  
8 relevant information that could be associated to the NOS, one point was added. ~~F~~There are five items  
9  
10 in cross-sectional studies and eight items in cohort and case-control studies that ~~could~~ be related  
11  
12 to the NOS were identified. Therefore, cross-sectional studies assigned 5, 4, 3, or 0-2 points were  
13  
14 evaluated as very good, good, satisfactory, or unsatisfactory studies, respectively. Similarly,  
15  
16 cohort/case-control studies with 7-8, 5-6, 4, and 0-3 points were identified as very good, good,  
17  
18 satisfactory, or unsatisfactory, respectively.  
19  
20  
21  
22  
23  
24

## 25 RESULTS

26  
27 As a result of the search strategy described in the Materials and Methods section, 123 studies were  
28  
29 identified from the database search and another 120 studies were found after a manual search. ~~A total~~  
30  
31 ~~of~~ These 243 articles, published between 1975 and 2010, met all the inclusion and exclusion criteria.  
32  
33  
34

35 A summary of the characteristics of the 243 selected articles is shown in Table 1.  
36  
37  
38  
39

### 40 **Study design and geographical area-**

41  
42 Of the selected studies, 176 were cross-sectional and the remaining seven were cohort and nested  
43  
44 case-control studies. The geographical areas included in the studies were USA (~~10~~ nine studies), UK  
45  
46 (four studies), Africa (four studies; two in South Africa, one in Egypt, and one in Kenya), Asia (three  
47  
48 studies; two in India, and one in Sri Lanka), Europe (two studies; one in Spain and one in Poland),  
49  
50 and ~~one in~~ South America (one study; Ecuador, ~~one study~~).  
51  
52  
53  
54

### Characteristics of subjects

Because the subjects were limited to people who had the probability of being occupationally exposed by OPs, the majority of the participants (60–70%) were men. Most of the time, agricultural work such as pesticide application and farming is has been is predominantly performed predominantly by men. SixFive out of the 243 studies included both male and female subjects; however, approximately 60 to 70 percent of the subjects were male ((9, 11, 17, 25, 27, 32)9, 21, 27, 29, 33), and oOnly one study used all female subjects in both the exposed and control groups (21)(23). In 132 of the studies The mean age of the exposed subjects was in the thirtie30s in 12 studies, in six studies the mean age was in the 40forties ((9, 14, 15, 19, 20, 31)9, 12, 16, 17, 24, 34) and in two studies the mean age was in the fiftie50s ((13, 17)13, 21). The mean age in twoone studies was in the twenties, however, the mean age was 29, very close to thirty ((25, 32)27). One of the studiesy did not report detailed demographic data of the participants (40)(10).

### Source of recruitment and sample size

Ten out of the 243 studies were on pesticide applicators including private, commercial, and tree, fruit, and vegetable applicators. Fiveour and three studies were on farmers and sheep farmers, respectively, and; two studies were on factory workers and greenhouse workers. One study investigated depressive symptoms in the spouses of OPs users. In the study by Korsak et al. (22), the

1  
2  
3  
4  
5  
6  
7  
8 specific occupation of the population in the study was not stated, however, the subjects had  
9  
10 experienced occupational OPs exposure ~~—(25(21))~~. The number of subjects in the exposed groups  
11  
12 varied from 16 to 2,051, while the control groups had a wider range ~~of subjects, with the figure~~  
13  
14 ~~ranging from (16 to 27,023)~~.  
15  
16  
17  
18  
19  
20  
21  
22  
23  
24  
25  
26  
27  
28  
29  
30  
31  
32  
33  
34  
35  
36  
37  
38  
39  
40  
41  
42  
43  
44  
45  
46  
47  
48  
49  
50  
51  
52  
53  
54  
55  
56  
57  
58  
59  
60



1  
2  
3  
4  
5  
6  
7  
8  
9  
10  
11  
12  
13  
14  
15  
16  
17  
18  
19  
20  
21  
22  
23  
24  
25  
26  
27  
28  
29  
30  
31  
32  
33  
34  
35  
36  
37  
38  
39  
40  
41  
42  
43  
44  
45  
46  
47  
48  
49

Table 1 Reported findings reported in recent epidemiological studies regarding occupational low level OPs exposure and mental illness

|    | Author                            | Study Design | Country      | Exposed Population(No)                                                  | Chemical     | Exposed Assessment           | Comparison Group                                                              |
|----|-----------------------------------|--------------|--------------|-------------------------------------------------------------------------|--------------|------------------------------|-------------------------------------------------------------------------------|
| 1  | Albers et al (9)(9)               | CO           | USA          | Chemical workers(53)                                                    | OP           | Industrial HR, AChE INH      | Similar workers, not exposed(60)                                              |
| 2  | Bazylewicz-Walczak et al (21)(23) | CO           | Poland       | Greenhouse workers(26)                                                  | OP           | DR                           | Greenhouse workers, not exposed(25)                                           |
| 3  | Beseler et al (10)(19)*           | NC/ CO       | USA          | Case**: Spouses of private applicators with depressive diagnoses(2,051) | OP           | QU or IN                     | Control: Spouses of private applicators without depressive diagnoses (27,023) |
| 4  | Cole et al (11)(33)               | CR           | Ecuador      | Farmers, some applicators(144)                                          | OP, CAR, FNG | IN, OU, AChE INH             | Local Population(72)                                                          |
| 5  | Daniell et al (12)(20)            | CO           | USA          | Farm worker applicators(49)                                             | OP           | QU, AChE INH                 | Slaughterhouse workers(40)                                                    |
| 6  | Dassanayake et al (13)(43)        | CR           | Sri Lanka    | Vegetable farm workers (38)                                             | OP           | N.A.                         | hospital labours(35)                                                          |
| 7  | Farahat et al (14)(24)            | CR           | Egypt        | Farm workers(52)                                                        | OP           | AChE INH                     | Local Population(50)                                                          |
| 8  | Fiedler et al (15)(34)            | CR           | USA          | Tree fruit farmers (57)                                                 | OP           | QU, lifetime exposure metric | Cranbury/blueberry growers(low exposed), hardware storeowners(unexposed) (42) |
| 9  | Korsak et al (22)(25)             | CR           | USA          | Occupational exposure(16)                                               | OP, OC       | CAR, AChE INH                | Local Population(low exposure)(16)                                            |
| 10 | Levin et al (23)(26)*             | CR           | USA          | Pesticide applicators(24)                                               | OP           | IN, AChE INH                 | Farmers(24)                                                                   |
| 11 | London et al (16)(48)             | CR           | South Africa | Fruit farm pesticide applicators(163)                                   | OP           | QU(job-matrix)               | Farm workers, not applicators(84)                                             |
| 12 | London et                         | CR           | South Africa | Fruit farm pesticide applicators(164)                                   | OP           | QU(job-matrix)               | Farm workers, not applicators(83)                                             |

Formatted: Font: 7 pt

Formatted: Font: 7 pt

Formatted Table

Formatted: Font: 7 pt

1  
2  
3  
4  
5  
6  
7  
8  
9  
10  
11  
12  
13  
14  
15  
16  
17  
18  
19  
20  
21  
22  
23  
24  
25  
26  
27  
28  
29  
30  
31  
32  
33  
34  
35  
36  
37  
38  
39  
40  
41  
42  
43  
44  
45  
46  
47  
48  
49

|    |                          |    |       |                              |         |                |                                            |             |
|----|--------------------------|----|-------|------------------------------|---------|----------------|--------------------------------------------|-------------|
|    |                          |    |       |                              |         |                |                                            | al(24)(15)* |
| 13 | Maizlish et al           | CR | USA   | Pesticide applicators(46)    | OP      | UM, DR         | Non-applicators(56)                        | (25)(27)    |
| 14 | Misra et al              | PR | India | Pesticide applicators(22)    | OP      | AChE INH       | Hospital labours(20)                       | (26)(28)*   |
| 15 | Ohayo-Mitoko et al       | CO | Kenya | Farm worker applicators(256) | OP, CAR | AChE INH       | Farm workers(low exposure)(152)            | (27)(29)*   |
| 16 | Rodnitzky et al          | CR | USA   | Pesticide applicators(23)    | OP      | AChE INH       | Farmers(23)                                | (28)(30)    |
| 17 | Roldan-Tapia et al       | CR | Spain | Greenhouse workers(40)       | OP, CAR | QU, AChE INH   | Local Population(26)                       | (18)(14)    |
| 18 | Ross et al (17)(21)      | CO | UK    | Sheep farmers(127)           | OP      | IN             | Police workers(78)                         |             |
| 19 | Rothlein et al(32)       | CR | USA   | Farm workers(96)             | OP      | UM, House dust | Workers in hotels and tourist industry(45) |             |
| 20 | Srivastava et al(29)(31) | CR | India | Manufacture workers(59)      | OP      | AChE INH       | Manufacture workers, not exposed(17)       |             |
| 21 | Steenland et al(30)(11)  | CR | USA   | Termiticide applicators(191) | OP      | IN, UM         | Friends, blue collar workers(189)          |             |
| 22 | Stephens et al           | CR | UK    | Sheep farmers(146)           | OP      | QU             | Quarry workers(143)                        | (19)(12)    |
| 23 | Stephens et al           | CR | UK    | Sheep farmers(77)            | OP      | QU, UM         | Quarry workers(69)                         | (31)(17)    |
| 24 | Stephens et al           | CR | UK    | Orchard applicators(37)      | OP      | IN, QU         | Construction workers, pig farmers(57)      | (20)(16)    |

- Formatted ... [1]
- Formatted ... [2]
- Formatted ... [3]
- Formatted ... [4]
- Formatted ... [5]
- Formatted ... [6]
- Formatted ... [7]
- Formatted ... [8]
- Formatted Table ... [9]
- Formatted ... [10]
- Formatted ... [11]
- Formatted ... [12]
- Formatted ... [13]
- Formatted Table ... [14]
- Formatted ... [15]
- Formatted ... [16]
- Formatted Table ... [17]
- Formatted ... [18]
- Formatted ... [19]
- Formatted ... [20]
- Formatted ... [21]
- Formatted Table ... [23]
- Formatted ... [24]
- Formatted ... [25]
- Formatted ... [26]
- Formatted ... [27]
- Formatted ... [28]
- Formatted ... [29]

1  
2  
3  
4  
5  
6  
7  
8  
9  
10  
11  
12  
13  
14  
15  
16  
17  
18  
19  
20  
21  
22  
23  
24  
25  
26  
27  
28  
29  
30  
31  
32  
33  
34  
35  
36  
37  
38  
39  
40  
41  
42  
43  
44  
45  
46  
47  
48  
49

Study Design: CR: Cross-sectional, CO: Cohort, NC: Nested case-control, PR: Prospective study

Chemical: OP: Organophosphates, OC: Organochlorines, CAR: Carbamates, FUN: Fungicides, AChE: Acetylcholinesterase

Exposed Assessment: AChE INH: AChE inhibition, DR: Dermal and Respiratory Absorption, IN: Interview, QU: Questionnaire, HR: Hygiene Records, UM: Urinary metabolites

\*Articles Studies that including depressive symptoms for outcome assessments

\*\*Cases were defined as female spouses of private applicators who responded 'yes' to the question "Has a DOCTOR ever told you that you had been diagnosed with depression requiring medication?" Controls were female spouses who responded 'no' (10)

- Formatted: Font: 6 pt
- Formatted: Font: 6 pt, No underline
- Formatted: Font: 6 pt
- Formatted: Font: 6 pt
- Formatted: Font: 6 pt, No underline
- Formatted: Font: 6 pt

peer review only

## Exposure assessment

Exposure assessment in the included studies ~~could be~~ was divided, for the most part, into five patterns: indirect assessment using, for example, an interview or questionnaire; direct assessment including ~~at~~ the measurement of urinary metabolites and acetylcholinesterase (AChE) levels in the blood or ~~a~~ measurement of ambient OPs using a patch and a pump; ~~a~~ combination of direct and indirect methods; ~~a combination of a biomarker and OPs exposure levels included in house dust~~; and ~~a~~ combination of biomarkers and ambient OP levels. Seven ~~out~~ of the ~~243~~ studies used indirect methods, and six studies used blood AChE inhibition levels to measure AChE levels in the blood as an exposure indicator. ~~Six~~ studies used a combination of indirect methods and biomarkers, ~~and~~ three studies used biomarkers and the ambient OP levels, ~~one study used a biomarker and house dust~~. The remaining study did not mention any exposure assessment methods. In all the studies ~~that~~ which used urinary metabolites as exposure assessment, ~~the~~ results were presented as the sum of dialkylphosphates (DAP) (i.e. the sum of six DAP metabolites: DMP (dimethylphosphate), DMTP (dimethylthiophosphate), DMDTP (dimethyldithiophosphate), DEP (diethylphosphate), DETP (diethylthiophosphate), and DEDTP (diethyldithiophosphate)) (25, 30-32)(8).

### Outcome measurements

Two different outcome measurements were used in the studies; one measured neurological impairment and the other assessed depressive symptoms. Of the 243 studies, 198 used cognitive function tests to investigate negative neurologic influences caused by OPs exposure.

### Associations between outcome and exposure

Ten of the 198 studies that investigated cognitive impairment mentioned that at least one measure outcome showed more impairment in the exposed groups; however, these observations were not significant ( $P < 0.05$ ). Seven of the studies reported some significant positive associations of exposure with poor outcome ( $P < 0.05$ ); however, even in these cases, the significant decrements were observed only in some of the neurologic tests, mainly in the Digit Span and Santa Ana Dexterity tests. Indeed, there are several versions of these neurologic tests and the significance of the scores often depended on the versions of the tests that were used. Five studies used the Neurobehavioral Evaluation System (NES), five studies used the Wechsler Adult Intelligence Scale (WAIS or WAIS-R), four studies used the Neurobehavioral Evaluation System (NES), two studies used the World Health Organization

Neurobehavioral Core Test Battery (NCTB)<sub>(37, 38)</sub><sup>(37)</sup>, and the remaining eight four studies used their own scales.

Five studies adopted depressive symptoms as outcome measurements, as shown in ~~the~~ Table 2; however, the symptoms used in the studies were not standardized.

Table 2 ~~The~~ Summary table of depressive symptoms used as outcome measurements

| Reference                                      | <del>Obtained</del> Results <u>obtained</u>                                                                                                                                                                                                                                           | Impact of outcomes |
|------------------------------------------------|---------------------------------------------------------------------------------------------------------------------------------------------------------------------------------------------------------------------------------------------------------------------------------------|--------------------|
| Beseler et al<br>2006(10) <sup>(10)</sup>      | Depression due to doctor's diagnosis was not significantly related to low (OR 1.09; 95%CI 0.91, 1.31) or high (OR 1.09; 95%CI 0.91, 1.31) cumulative exposure.                                                                                                                        | -                  |
| Levin et al<br>1976(23) <sup>(26)</sup>        | Anxiety score of the pesticide applicators was significantly higher (P<0.05) than that of the farmers. However, there was no significant difference in measures of depression.                                                                                                        | ++                 |
| London et al<br>1998(24) <sup>(15)</sup>       | Dizziness, sleepiness, and headache <del>had</del> a significantly higher overall neurological symptom score (P<0.05).                                                                                                                                                                | ++                 |
| Misra et al<br>1985(26) <sup>(28)</sup>        | Common symptoms were Headache (59%), giddiness (50%), ocular symptoms (27%), and paresthesia (18%) and no neurologic change was seen.                                                                                                                                                 | -                  |
| Ohayo-Mitoko et al<br>2000(27) <sup>(29)</sup> | A significant change in symptom prevalence was found for <u>the</u> respiratory (2.48% CI (0.78, 5.38) and central nervous system (2.56% CI (0.99, 6.62), but in terms of skin <del>symptoms</del> <u>systemic</u> , and eye symptoms, there was no statistically significant change. | ++                 |

OR=Odds Ratio ++: Statistically significant (P<0.05), -: Not statistically significant

Formatted: Font: 8 pt  
Formatted: Indent: First line: 0.5 ch  
Formatted: Font: 8 pt

### Statistical analysis

Sixteen studies used logistic regression, and the remaining eight seven used other

1  
2  
3  
4  
5  
6  
7  
8  
9 statistical tests including  $X^2$ -test and t-test. Only one study adjusted for sex in the  
10  
11 logistic regression. ~~Fourteen~~~~Thirteen~~ ~~out~~ of the 243 studies adjusted for age, and 124  
12  
13 adjusted for education in the ~~statistical analysis~~~~logistic regression~~. However, only five  
14  
15 studies adjusted for alcohol consumption before carrying out the statistical analysis,  
16  
17 and ~~Further~~, only two studies adjusted for first language.  
18  
19  
20  
21  
22  
23

#### 24 **Methodological quality appraisal**

25  
26 Based on NOS, ~~Five~~~~our~~ ~~out~~ of the 243 studies were of very good quality, 10 were of  
27  
28 good quality, and the remaining nine were either satisfactory or unsatisfactory. Most ~~of~~  
29  
30 ~~the bad quality~~ studies with unsatisfactory scores~~quality~~ either were carried out before  
31  
32 1990 or were performed in some of the less developed countries. In particular, the  
33  
34 methods of recruitment of subjects, controlling for confounders, and outcome  
35  
36 assessment were not appropriate. For example, in some ~~of the~~ studies, all of the  
37  
38 participants were volunteers ((14, 28)~~24, 30~~) and in another study, the subjects were not  
39  
40 representative of the community from which they were recruited (factory workers)  
41  
42 (29)~~(31)~~. In addition, in the unsatisfactory studies, how the outcome was assessed was  
43  
44 not described ~~in the unsatisfactory studies~~, and ~~some of the~~ methods needed to avoid  
45  
46 confounders such as stratification and regression were not used. ~~On the other hand~~,  
47  
48  
49  
50  
51  
52  
53  
54

1  
2  
3  
4  
5  
6  
7  
8  
9 ~~None~~ of the cohort studies were assessed as very good quality because most of them  
10  
11 did not have a long enough follow-up duration (in five studies, the duration was less  
12  
13 than six months) and the selected subjects were not fully representative of the target  
14  
15 community. Moreover, the methods of outcome assessment were not described in most  
16  
17 of the cohort studies.  
18  
19  
20

#### 21 22 23 **Data synthesis ~~and meta-analysis~~**

24  
25 ~~As shown in Figure 1 and 2, a meta-analysis was carried out using the reported mean~~  
26  
27 ~~scores for the implemented neurobehavioral test; however, because the investigators~~  
28  
29 ~~used different scoring systems, meta-analysis was difficult. The results of the~~  
30  
31 ~~neurologic tests used in the studies are~~ summarized in Table3. As can be seen ~~in the~~  
32  
33 ~~Table3, the test batteries differed from each study to study.~~ The commonly used tests  
34  
35 ~~batteries~~ in NCTB, NES, and WAIS were Symbol-Digit and Digit Span Forward and  
36  
37 Backward. However, some studies that adopted NES and WAIS to measure neurologic  
38  
39 impairment (~~Table3~~) implemented only a few subsets in the trials. Among ~~the 13~~ five  
40  
41 studies ~~that used~~ a Symbol-Digit test, ~~each four~~ three used NES and ~~unknown tests,~~  
42  
43 ~~each WAIS,~~ two used ~~WAIS and~~ WAIS-R ~~and unknown tests,~~ and one ~~was used~~ a Polish  
44  
45 NCTB. ~~For~~ Among the ~~studies that used~~ Digit Span, ~~there were~~ ~~Forward and~~  
46  
47  
48  
49  
50  
51  
52  
53  
54



1  
2  
3  
4  
5  
6  
7  
8  
9 ~~Backward tests, some studies performed both tests, but while the others did either only~~  
10 ~~one of the tests as shown in Table 3. test, two studies used NES and WAIS in the forward~~  
11 ~~tests and two WAIS in the backward tests. Overall, As a result, there were only four of~~  
12 ~~the studies that used the same test battery in NES and WAIS, respectively, and it was~~  
13 ~~impossible to perform a meta-analysis for neurological test batteries. Because there~~  
14 ~~were only two studies in each Digit Span test, a meta-analysis would not be very useful,~~  
15 ~~and so a meta-analysis for the Digit Span tests was not carried out and only a~~  
16 ~~meta-analysis for NES and WAIS Symbol Digit tests was performed. In terms of~~  
17 ~~Symbol Digit (NES), slight positive association can be seen (Figure 1), while Figure 2~~  
18 ~~showed that there was no difference in mean score of Symbol Digit WAIS between the~~  
19 ~~exposed and control groups. Although the three studies apparently used the same~~  
20 ~~scoring systems, one of the scores was completely different from the scores in the other~~  
21 ~~two studies. For example, the scores in the study by Stephens et al. (31) were 24.22~~  
22 ~~and 21.01 in the exposed and the control groups, respectively (30)(17), whereas the~~  
23 ~~scores reported by Daniell et al. and Stephens et al. were much lower and between~~  
24 ~~2.23 and 3.55 (12, 20, 31)(16, 17, 20). Similarly, the mean scores reported by~~  
25 ~~Bazylewicz-Walczak et al. (215) were higher, 45.50 and 49.40, while the mean scores~~  
26 ~~reported in the other studies were smaller, 2.28 and 2.23 in the WAIS (25)(24)(27). In~~

consideration of insufficient number of studies and possible systematic differences in the population characteristics and/or in the measurement procedures between the studies, we decided not to conduct a meta-analysis.

Table-3 ~~The s~~Summary table of the neurologic test batteries used in some of the studies battery tests

Formatted: Indent: First line: 4 ch

| Reference                             | Types of neurologic tests       | Symbol Digit        | Digit Span                                     | Santa Ana | Simple Reaction Time | Syntactic Reasoning(s) |
|---------------------------------------|---------------------------------|---------------------|------------------------------------------------|-----------|----------------------|------------------------|
| Bazylewicz-Walczak et al 1999(21)(23) | Polish NCTB/WAIS (Symbol Degit) | nd                  | nd                                             | nd        | **+                  | nd                     |
| Cole et al 1997(11)(33)               | NCTB                            | nm                  | nm                                             | nm        | nd                   | nd                     |
| Daniell et al 1992(12)(20)            | NES                             | *-                  | nd                                             | nd        | nd                   | nd                     |
| Farahat et al 2003(14)(24)            | Unknown                         | ***++               | ***++(f) <sup>1</sup><br>***++(b) <sup>2</sup> | nd        | nd                   | nd                     |
| Fiedler et al 1997(15)(34)            | WAIS-R                          | *-                  | *-                                             | nd        | ***++                | nd                     |
| London et al 1997(16)(18)             | WAIS-R                          | nm                  | nm                                             | ***++     | nm                   | nd                     |
| Maizlish et al 1987(25)(27)           | WAIS                            | ↓***++              | nd                                             | nd        | nd                   | nd                     |
| Roldan-Tapia et al 2005(18)(14)       | WAIS                            | ***++ <sup>3†</sup> | ***++ <sup>3†</sup>                            | nd        | nd                   | nd                     |
| Ross et al 2010(17)(16)               | WAIS                            | nd                  | ***++                                          | nd        | nd                   | nd                     |
| Rothlein et al 2006(32)               | Unknown                         | *                   | *(f) <sup>1</sup><br>***(b) <sup>2</sup>       | nd        | *                    | nd                     |
| Srivastava et al 2000(29)(31)         | Unknown                         | ***++               | ***++                                          | nd        | nd                   | nd                     |
| Steenland et al 2000(30)(11)          | NES                             | *-                  | *-                                             | nd        | *-                   | nd                     |
| Stephens et al                        | Unknown                         | ***++               | *-                                             | nd        | ***++                | **+                    |

Formatted: Superscript

Formatted: Superscript

Formatted: Superscript

Formatted: Superscript

1  
2  
3  
4  
5  
6  
7  
8  
9  
10  
11  
12  
13  
14  
15  
16  
17  
18  
19  
20  
21  
22  
23  
24  
25  
26  
27  
28  
29  
30  
31  
32  
33  
34  
35  
36  
37  
38  
39  
40  
41  
42  
43  
44  
45  
46  
47  
48  
49  
50  
51  
52  
53  
54  
55  
56  
57  
58  
59  
60

|                |         |    |    |    |    |        |
|----------------|---------|----|----|----|----|--------|
| 1995(19)(12)   |         |    |    |    |    |        |
| Stephens et al | NES/ACT | nm | nm | nd | nm | nm     |
| 1996(31)(17)   |         |    |    |    |    |        |
| Stephens et al | NES/ACT | *_ | *_ | nd | *_ | ***_+  |
| 2004(1)(16)    |         |    |    |    |    | (ACTS) |

\*\*\*+ P<0.05, \*\*+ 0.05 ≤ P<0.1, \*\_ P>0.1;  
 The exposed groups were slower or had poorer outcomes than the control groups  
<sup>1</sup>+ (f) Digit Span #Forward  
<sup>2</sup>-(b) Digit Span -bBackward  
<sup>3</sup>+ The article did not mention whether the obtained results were positive or negative was not reported in the studies  
 nd: The subsets of neurological tests were not performed  
 nm: Although the subsets of neurological tests were performed but P-values were not mentioned in the article reported  
 \*(f) Digit Span forward, \*(b) Digit Span backward

- Formatted: Font: 8 pt
- Formatted: Font: 8 pt
- Formatted: Font: 8 pt
- Formatted: Indent: First line: 0.5 ch
- Formatted: Font: 8 pt
- Formatted: Font: 8 pt
- Formatted: Font: 8 pt
- Formatted: Superscript
- Formatted: Superscript
- Formatted: Font: 8 pt, Superscript
- Formatted: Indent: First line: 0.5 ch
- Formatted: Superscript
- Formatted: Font: 8 pt
- Formatted: Font: 8 pt
- Formatted: Font: 8 pt
- Formatted: Indent: First line: 0.5 ch
- Formatted: Font: 8 pt

**DISCUSSION**

The systematic keyword and manual searches results showed that there were of the published literature identified 243 epidemiological studies that which examined the relationship between OPs and CNS by systematically searching. When the relevant information was assessed comparing the selected studies by each item, two main findings were obtained; one was the method of exposure assessment, and the other was the method used for the outcome measurement. With respect to For exposure assessment, the matter of measurement methods were as categorized as into three: direct, indirect, and a combination of both methods direct and indirect. For the On the other hand, in terms of outcome measurements, there seemed to be two main

1  
2  
3  
4  
5  
6  
7  
8  
9 assessments ways were used to gauge neurologic impairment and depressive symptoms.

### 14 Exposure assessment

16 Exposure assessment was not used for group allocation in all the studies; ~~and~~ rather, it  
18 was implemented to measure how much subjects were exposed and the outcomes of the  
20 neurobehavioral tests. ~~Each study used~~ different exposure assessment methods were  
22 used in each study, which made it difficult to accurately compare the studies. In addition,  
24 there seemed to be methodological imperfections in both the direct and indirect methods.  
26 For example ~~To illustrate~~, in one study, an interviews and questionnaires were used ~~in~~  
28 the indirect method, ~~though, one study for the~~ recruited subjects over 60 years old who  
30 had been retired for 11 years ~~since their retirement~~ (17)(21). This method is subject  
32 has the potential of causing In this study, to recall bias ~~could be a problem~~ because the rate  
34 of cognitive impairment is likely to have increased as the subjects aged ~~put on years~~.  
36 This could lead to inaccuracy of exposure assessment. However, other indirect methods,  
38 especially extensive history records of pesticide use could be considered as a proxy of  
40 how much OPs might have accumulated in the body, thus records of this type can be  
42 used to estimate the amount of OPs by long-term exposure, even though there may be  
44 some recall bias. ~~With respect to~~ For the direct methods, ~~there were several ways to~~

1  
2  
3  
4  
5  
6  
7  
8  
9 detect OPs. Although some studies used DPA biomarkers use or ~~such as~~ urinary  
10 metabolites ~~as an indicator of exposure~~ was used, as an exposure index in the study;  
11  
12 however, DPA is metabolized rapidly and excreted ~~from bodies~~ (6)(7). Therefore,  
13  
14 measuring urinary analysis was not a perfect way to assess OPs exposure, ~~On the~~  
15  
16 contrary, ~~it seemed that measuring AChE levels was the most reliable way to assess the~~  
17  
18 amount of OP exposure, because the blood AChE cholinesterase levels need take  
19  
20 approximately one week to becomes normal ~~by being synthesized into a new molecular~~  
21  
22 of AChE, which takes around a week (39)(35); ~~h~~ Hence, although the amount of OP  
23  
24 exposure within one week can be accurately measured by AChE inhibition level in  
25  
26 blood, but the blood AChE levels this cannot be used to assessed the  
27  
28 amount accumulation of of OPs exposure accumulated in body tissues over for a long  
29  
30 time. ~~it~~ Thus, direct method using the levels of AChE in blood is appropriate for can be  
31  
32 used to assessing short-term exposure, ~~however, it is not for long term exposure.~~ On the  
33  
34 contrary, indirect methods, especially extensive history records of pesticides ~~such as~~  
35  
36 structured interview and questionnaire could be a proxy helpful to grasp the past  
37  
38 information about OPs use how much OPs were accumulated in the body, even though  
39  
40 there may be some recall bias. In order to minimize measurement errors, a mixed  
41  
42 method for the assessment of short-term and long-term exposure should be established.  
43  
44  
45  
46  
47  
48  
49  
50  
51  
52  
53  
54

~~a it is desired that standardized measurement method should be established for further research, a combination of direct and indirect methods should be used.~~

### Outcome assessment

~~The main problem in analyzing the outcome measurements was the inconsistencies in the results of neurologic test batteries—were not consistent differed from each study. V, and even if the same test battery was used, the types of tests such as NES and WAIS were different. To elaborate, as shown in Table 3, three studies adopted WAIS and four used NES as outcome assessment, and since there were various versions of the neurologic tests were used in the studies and battery tests including WAIS and WAIS-R, the content of the tests slightly differ slightly from in each study (Table3). Therefore, only a few tests were common across some of the studies, which made it difficult to compare the studies. Further, a meta-analysis could not be applied because of the insufficient a small number of number of studies. MPerforming a meta-analysis could have been performed might be possible by dividing the results into subgroups;- however, the A meta analysis using results that would be obtained from the meta analysis could~~

1  
2  
3  
4  
5  
6  
7  
8  
9 be highly misleading due to because of loss of power of studies (40) and cause sampling  
10 and publication biases. a small number of studies has the potential of causing sampling  
11 and publication bias due to small effect size, and even if a meta analysis was  
12 implemented, the reliability would be low. Similarly, in terms of depressive symptoms,  
13 the outcomes assessment was againere different infrom each study. For instance, one  
14 study usedhad the proportion of headaches, while the another used that of dizziness and  
15 sleepiness as the main outcomes. To gain better insights into whether preeise conelusion  
16 that occupationaleumulative OP exposure can negatively affect the human CNS or not,  
17 at the very least, avoid these problems, aneurologic test batteriesbattery tests, at least,  
18 should be standardized outcome measurement and integrateda guidelines for measuring  
19 of neurologic symptomsimpairment should be set for all future epidemiological studies.  
20  
21  
22  
23  
24  
25  
26  
27  
28  
29  
30  
31  
32  
33  
34  
35  
36  
37  
38  
39  
40  
41  
42  
43  
44  
45  
46  
47  
48  
49  
50  
51  
52  
53  
54  
55  
56  
57  
58  
59  
60

As with exposure assessment, a similar problem can be seen in outcome assessment, for example, five out of the 23 studies adopted depressive symptoms as outcome measurements (Table 2). On the other hand, the remaining 18 studies used neurologic battery tests such as NES and WAIS. Thus the main problem in the outcome measurements is that comparison between the studies could not be done easily, because neurologic battery tests differed by each study. To elaborate, as shown in Table 3, three studies adopted WAIS and four used NES as outcome assessment, and since there were

1  
2  
3  
4  
5  
6  
7  
8  
9 ~~various versions of neurologic battery tests including WAIS and WAIS-R, the content of~~  
10 ~~the tests slightly differ from each study.~~ Furthermore, although some studies mentioned  
11 ~~about~~ the possible relationship between OPs exposure and confounding factors such as  
12 age and education, ~~they did not perform~~ statistical tests between the exposed and control  
13 groups were not performed in these studies. These inconsistencies things obviously  
14 make it difficult to compare the ~~outcomes of~~ neurologic impairment outcomes among  
15 the studies. ~~In addition, even in the same neurologic battery test, there are a variety of~~  
16 ~~subtests such as Symbol Digit and Digit Span to measure neurologic impairment. The~~  
17 ~~studies selected some subtests in their trials, hence there were few studies left to~~  
18 ~~precisely compare. As a consequence, although the meta-analysis was carried out using~~  
19 ~~the results of Symbol Digit, it was not enough to determine whether or not there was a~~  
20 ~~statistically significant relationship. Similarly, in terms of depressive symptoms,~~  
21 ~~outcomes were different from each study, for instance, one study had the proportion of~~  
22 ~~headache, while the other used that of dizziness and sleepiness as main outcomes. Thus,~~  
23 ~~neurologic battery tests, at least, should be standardized for further epidemiological~~  
24 ~~research. If not, it could be difficult to gain precise conclusion that cumulative OP~~  
25 ~~exposure can negatively affect human CNS or not.~~



## Study design

~~Although 176 Sixteen of 243 the studies were cross-sectional studies, and six were cohort studies. Longitudinal or cohort studies are more appropriate, desirable rather than cross-sectional studies for three main reasons: one, in cross-sectional studies, it is difficult to confirm whether or not the disease preceded the exposure; two, because the outcome conditions in cross-sectional studies are too short lasting (36); and three, cross-sectional studies are suitable for investigating at a certain point, but they are not appropriate for mid-term studies. Especially, agricultural work using pesticides is easily influenced by seasonality; and one research regarding reproductive health by OPs exposure stated that sperm concentration and counts are negatively affected in spring peak season, spring, rather than winter (5)(6). Therefore, the result effect on the the CNS neurobehavioral tests may could also be affected by seasonality; therefore, cohort studies are ideal to assess the influence of occupational OPs exposure than cross-sectional.~~

## Sources of Possible biases

~~Only published studies written in English were searched, thus publication bias could have occurred. In future studies, non-English studies and unpublished studies should be~~

1  
2  
3  
4  
5  
6  
7  
8  
9 ~~included to reduce publication bias. If foreign workers are included in the trials that~~  
10 ~~included foreign workers, their first language and education levels should~~ could be  
11 considered as possible biases. ~~B~~ because there is a possibility that ~~the~~ non-native  
12 subjects ~~cannot~~ did not fully understand the content and instructions ~~of~~ for the tests,  
13 which could lead to ~~them obtaining a~~ lower score than ~~that of~~ native speakers.  
14 ~~Additionally, the education systems in developed and less developed countries could be~~  
15 ~~very different.~~ Nowadays, ~~developed countries such as~~ USA and ~~the~~ Gulf countries  
16 have accepted foreign workers ~~from India and South American countries~~ as ~~an~~  
17 important ~~part of the~~ work-force (12, 32, 41) ~~(20, 37, 38)~~. ~~These factors needed to be~~  
18 ~~adjusted carefully in the sampling and analytical stages of the study. However, in this~~  
19 ~~systematic review, there were~~ only two ~~of the selected~~ studies ~~to~~ mentioned ~~about~~ first  
20 language in their ~~statistical analyses inclusion and exclusion criteria~~ (12, 31) ~~(17, 20)~~.  
21 ~~Since first language could influence the outcomes, it should be one of the factors to be~~  
22 ~~considered when selecting subjects. Furthermore, when migrants and foreign labourers~~  
23 ~~are included in the studies, education system is a point that we have to pay attention.~~  
24 ~~Because education system between developed and less developed countries could be~~  
25 ~~largely different. Hence, it is necessary to be careful when the results between subjects~~  
26 ~~who come from different countries are compared. Additionally, occupations could be a~~

1  
2  
3  
4  
5  
6  
7  
8  
9 ~~factor of also contribute to~~ selection bias; because, ~~for example, a~~ police officer ~~or and~~  
10 construction workers ~~would~~ have a ~~higher possibility~~probability of experiencing ~~the~~ loss  
11 of consciousness due to accidents ~~of their jobs~~than workers with different occupations  
12  
13  
14  
15  
16  
17 (17) ~~(21)~~.

### 21 Possible confounders

22  
23  
24 ~~Age and social cultural factors are known as common confounding factors, though, not~~  
25 ~~all studies adjusted them in the analysis. These factors could easily influence the results;~~  
26  
27 ~~hence they should be adjusted for further trials. Moreover, Apart from common~~  
28  
29 ~~confounders such as age and education, since head injury and alcohol consumption~~  
30  
31 ~~could be other confounders, because have a probability of negatively affecting~~  
32  
33 ~~neurologic battery tests, they can cause neurologic impairment due to memory~~  
34  
35 ~~deterioration they should be treated as potential confounders as well. Although some of~~  
36  
37 ~~the studies adjusted for alcohol consumption in the analysis (10, 12, 16, 24, 25) (10, 15,~~  
38  
39 ~~18, 20, 27), no study adjusted for head injury. However, the results showed that there~~  
40  
41  
42  
43  
44  
45  
46  
47 ~~was no study to adjust head injury in the logistic regression, on the other hand, there~~  
48  
49 ~~were some studies to adjust alcohol consumption in the analysis (10, 15, 18, 20, 27).~~  
50  
51  
52 ~~Apart from these factors~~Furthermore, ~~participants~~<sup>2</sup> nutrition status including vitamin  
53  
54

1  
2  
3  
4  
5  
6  
7  
8  
9 deficiency ~~can~~ also be relevant to the outcome of neuropsychological tests (16, 24)(~~15~~,  
10  
11 ~~18~~). Thus, ~~all~~-factors other than the common confounders that could negatively~~an~~ affect  
12  
13 ~~measurements of~~ cognitive function should be adjusted for in the analysis.  
14  
15

### ~~Limitations~~ Strengths and limitations of this review ~~study weaknesses~~

#### Strengths

16  
17  
18  
19  
20  
21  
22  
23  
24 A major strength of this systematic review is that the characteristics of the selected  
25  
26 studies were summarized using tables, and limitations of the exposure and outcome  
27  
28 assessments used in these studies were ~~mainly~~ identified mainly on the basis of the  
29  
30 constructed tables. Furthermore, the systematic review allowed us to propose  
31  
32 recommendations that will be useful for standardizing future epidemiological research.  
33  
34

#### Weaknesses

35  
36  
37  
38  
39  
40 All of the selected studies were relevant to occupational OPs exposure; however, some  
41  
42 of them included other pesticides such as carbamates, fungicides, and herbicides.  
43  
44 Pesticides that are commonly used in agriculture are usually mixtures of different  
45  
46 pesticides, which are used to increase their effect. Four of the 243 selected studies used  
47  
48 a combination of OPs, organochlorines, carbamates, and fungicide; hence, the effect of  
49  
50 only occupational OPs exposure could not be measured in these studies.  
51  
52  
53  
54

Formatted: Font: Not Bold

Formatted: Indent: First line: 0 ch

Formatted: Font: Not Bold

Formatted: Indent: First line: 0 ch

1  
2  
3  
4  
5  
6  
7  
8  
9 ~~In~~ Although all of the studies which were collected in this systematic review were  
10 relevant to occupational OP exposure, some of them included other pesticides such as  
11 carbamates, fungicides, and herbicides. Pesticides usually are mixed with another type  
12 of pesticides to make their effects stronger, and this is the common in agriculture. In  
13 ~~this~~ systematic review, four out of 23 studies were not single OPs exposure and they  
14 used a combination of OPs, OCs carbamates and fungicide, which complicated  
15 Therefore, it may be quite difficult to measure the effect of only occupational OP  
16 exposure.

17  
18  
19  
20  
21  
22  
23  
24  
25  
26  
27  
28  
29 Of these studies, the outcome assessments<sup>18</sup> assessed neurological or  
30 neuropsychological impairment using IQ tests. However, since the authors used the  
31 different neurological types of tests were used battery tests such as NCTB, NES, and  
32 WAIS, consequently, the lack of pooling evidence meant that there were only a few  
33 common tests including Digit Span and Symbol digit tests across the studies,  
34 comparisons among the studies became extremely difficult, furthermore, which made  
35 the comparison of the included studies more difficult. Hence, a meta-analysis was  
36 could  
37 not be performed applied to the two tests, but it is Small effect size due to a small  
38 number of studies may cause sampling and publication bias. and even if a meta-analysis  
39 is applied, it would be unreliable obvious that studies which can be appraised are  
40  
41  
42  
43  
44  
45  
46  
47  
48  
49  
50  
51  
52  
53  
54  
55  
56  
57  
58  
59  
60

1  
2  
3  
4  
5  
6  
7  
8  
9 ~~limited. In order to completely assess neurological impairment, there is necessity of the~~  
10 ~~standardized tests battery for measuring neurological impairment it is desirable that the~~  
11 ~~same neurobehavioral test battery be used in a large number of studies. Furthermore~~  
12 ~~In~~  
13 ~~addition, the exclusion~~~~excluding of studies written in languages other than English is~~  
14 ~~another limitation of this review, and literature retrieval by only the first author could~~  
15 ~~have introduced some bias into the selection of the studies.~~~~one of another review.~~  
16  
17  
18  
19  
20  
21  
22  
23  
24  
25  
26  
27  
28  
29  
30  
31  
32

## CONCLUSION

33  
34 ~~Although~~~~While some studies indicated negative influence on the human CNS based on~~  
35 ~~the results of neurobehavioral or neuropsychological test batteries, the others did not.~~  
36  
37 ~~Hence, enough consistent results were not obtained to determine whether or not~~  
38 ~~occupational OPs exposure could be harmful on the human CNS. the suggestive~~  
39 ~~evidence for neurobehavioral test battery is inconsistent, there was a slight positive~~  
40 ~~relationship of poor outcome implying that occupational exposure to OPs could be~~  
41 ~~harmful for the CNS of the human. The evidence was weak in particular because some~~  
42 ~~studies showed that there was a negative relationship of OPs with poor outcome.~~~~In~~  
43  
44  
45  
46  
47  
48  
49  
50  
51  
52  
53  
54

1  
2  
3  
4  
5  
6  
7  
8  
9 addition, since the test items tested in the neurological behavioral or  
10 neuropsychological test batteries, and the estimates of OPs exposure were inconsistent  
11 because they depended on the preferences of the investigators, thus they were  
12 inconsistent, only a few items were common across the studies. Consequently, because  
13 there were only a few studies left, a meta-analysis could not be performed for the  
14 meta-analysis; indeed, there were a few items which could be compared. For future  
15 studies, the neurobehavioral and/or neuropsychological test types, test batteries, method  
16 used to measure should be standardized in order to ensure adequate quality and to make it  
17 more possible to pooling the evidence from a large number of the studies for future  
18 analysis.

19  
20  
21  
22  
23  
24  
25  
26  
27  
28  
29  
30  
31  
32  
33  
34 For future studies, it would be best to standardize the neurological and  
35 neuropsychological test types, test batteries, and the methods used to measure OPs, to  
36 enable precise comparisons of results and pooling of evidence from a large number of  
37 studies for future analyses. However, this may be difficult to achieve in practice because  
38 OPs are used in differing settings around the world, and education systems vary  
39 considerably between countries.

Formatted: Not Highlight

Formatted: Not Highlight

Formatted: Not Highlight

Formatted: Indent: First line: 0 ch

## ACKNOWLEDGMENTS

We ~~wish to express our appreciation to~~thank Professor Ben Armstrong for his insightful comments on our paper.

## FOOTNOTES

**Contributors** NT conceived [the](#) study design and participated in protocol development, literature searching, data extraction, data analysis, and drafted the manuscript. MH critically reviewed the draft and contributed to the manuscript revisions.

**Funding** ~~This research received a~~No specific grant [was obtained from](#) any [public](#) funding agency [for this research in the public](#).

**Competing interests** None.

**Ethical approval** Systematic review.

**Provenance and peer review** Not commissioned, externally peer reviewed.

**Data sharing statement** No additional data are available.

## REFERENCES

- [1. Centre WHOM. Pesticides are a leading suicide method. 2006.](#)
- [2. Steenland K, Jenkins B, Ames RG, et al. \(2\). American journal of public health.](#)



1  
2  
3  
4  
5  
6  
7  
8  
9 ~~1994;84(5):731-6. Epub 1994/05/01.~~

10  
11 ~~3.——Moretto A, Lotti M. Poisoning by organophosphorus insecticides and sensory~~  
12 ~~neuropathy. Journal of neurology, neurosurgery, and psychiatry. 1998;64(4):463-8. Epub~~  
13  
14 ~~1998/05/12.~~

15  
16  
17  
18  
19 ~~4.——Rohlman DS, Arcury TA, Quandt SA, et al. Neurobehavioral performance in~~  
20 ~~preschool children from agricultural and non-agricultural communities in Oregon and~~  
21 ~~North Carolina. Neurotoxicology. 2005;26(4):589-98. Epub 2005/08/23.~~

22  
23  
24  
25  
26  
27 ~~5.——Rastogi SK, Tripathi S, Ravishanker D. A study of neurologic symptoms on~~  
28 ~~exposure to organophosphate pesticides in the children of agricultural workers. Indian~~  
29 ~~journal of occupational and environmental medicine. 2010;14(2):54-7. Epub~~  
30  
31 ~~2010/12/02.~~

32  
33  
34  
35  
36  
37 ~~6.——Recio Vega R, Ocampo Gomez G, Borja Aburto VH, et al. Organophosphorus~~  
38 ~~pesticide exposure decreases sperm quality: association between sperm parameters and~~  
39 ~~urinary pesticide levels. Journal of applied toxicology : JAT. 2008;28(5):674-80. Epub~~  
40  
41 ~~2007/11/30.~~

42  
43  
44  
45  
46  
47 ~~7.——Yuera S, Gasco M, Rubio J, et al. Semen quality in Peruvian pesticide~~  
48 ~~applicators: association between urinary organophosphate metabolites and semen~~  
49 ~~parameters. Environ Health Glob. 2008;7:-.~~

1  
2  
3  
4  
5  
6  
7  
8  
9  
10  
11  
12  
13  
14  
15  
16  
17  
18  
19  
20  
21  
22  
23  
24  
25  
26  
27  
28  
29  
30  
31  
32  
33  
34  
35  
36  
37  
38  
39  
40  
41  
42  
43  
44  
45  
46  
47  
48  
49  
50  
51  
52  
53  
54  
55  
56  
57  
58  
59  
60

8. ~~Yuera S, Rubio J, Gasco M, et al. Semen quality and reproductive sex hormone levels in Peruvian pesticide sprayers. International journal of occupational and environmental health. 2006;12(4):355-61.~~

9. ~~Albers JW, Berent S, Garabrant DH, et al. The effects of occupational exposure to chlorpyrifos on the neurologic examination of central nervous system function: a prospective cohort study. Journal of occupational and environmental medicine / American College of Occupational and Environmental Medicine. 2004;46(4):367-78. Epub 2004/04/13.~~

10. ~~Beseler C, Stallones L, Hoppin JA, et al. Depression and pesticide exposures in female spouses of licensed pesticide applicators in the agricultural health study cohort. Journal of occupational and environmental medicine / American College of Occupational and Environmental Medicine. 2006;48(10):1005-13. Epub 2006/10/13.~~

11. ~~Steenland K, Dick RB, Howell RJ, et al. Neurologic function among termiticide applicators exposed to chlorpyrifos. Environmental health perspectives. 2000;108(4):293-300. Epub 2000/04/07.~~

12. ~~Stephens R, Spurgeon A, Calvert IA, et al. Neuropsychological effects of long-term exposure to organophosphates in sheep dip. Lancet. 1995;345(8958):1135-9. Epub 1995/05/06.~~

- 1  
2  
3  
4  
5  
6  
7  
8  
9 13. ~~Dassanayake T, Gawarammana IB, Weerasinghe V, et al. Auditory~~  
10 ~~event related potential changes in chronic occupational exposure to organophosphate~~  
11 ~~pesticides. Clinical neurophysiology : official journal of the International Federation of~~  
12 ~~Clinical Neurophysiology. 2009;120(9):1693-8. Epub 2009/08/18.~~  
13  
14  
15  
16  
17  
18  
19 14. ~~Roldan Tapia L, Parron T, Sanchez Santed F. Neuropsychological effects of~~  
20 ~~long term exposure to organophosphate pesticides. Neurotoxicology and teratology.~~  
21 ~~2005;27(2):259-66. Epub 2005/03/01.~~  
22  
23  
24  
25  
26  
27 15. ~~London L, Nell V, Thompson ML, et al. Effects of long term organophosphate~~  
28 ~~exposures on neurological symptoms, vibration sense and tremor among South African~~  
29 ~~farm workers. Scandinavian journal of work, environment & health. 1998;24(1):18-29.~~  
30 ~~Epub 1998/04/30.~~  
31  
32  
33  
34  
35  
36  
37 16. ~~Stephens R, Sreenivasan B. Neuropsychological effects of long term low level~~  
38 ~~organophosphate exposure in orchard sprayers in England. Archives of environmental~~  
39 ~~health. 2004;59(11):566-74. Epub 2006/04/08.~~  
40  
41  
42  
43  
44  
45 17. ~~Stephens R, Spurgeon A, Berry H. Organophosphates: the relationship between~~  
46 ~~chronic and acute exposure effects. Neurotoxicology and teratology. 1996;18(4):449-53.~~  
47 ~~Epub 1996/07/01.~~  
48  
49  
50  
51  
52  
53 18. ~~London L, Myers JE, Nell V, et al. An investigation into neurologic and~~  
54

- 1  
2  
3  
4  
5  
6  
7  
8  
9 neurobehavioral effects of long term agrichemical use among deciduous fruit farm  
10 workers in the Western Cape, South Africa. Environmental research.  
11  
12  
13  
14 1997;73(1-2):132-45. Epub 1997/01/01.  
15  
16 19. Cole DC, Carpio F, Julian J, et al. Neurobehavioral outcomes among farm and  
17 nonfarm rural Ecuadorians. Neurotoxicology and teratology. 1997;19(4):277-86.  
18  
19  
20  
21 20. Daniell W, Barnhart S, Demers P, et al. Neuropsychological performance  
22 among agricultural pesticide applicators. Environmental research. 1992;59(1):217-28.  
23  
24  
25  
26 Epub 1992/10/01.  
27  
28  
29 21. Maekenzie Ross SJ, Brewin CR, Curran HV, et al. Neuropsychological and  
30 psychiatric functioning in sheep farmers exposed to low levels of organophosphate  
31 pesticides. Neurotoxicology and teratology. 2010;32(4):452-9. Epub 2010/03/17.  
32  
33  
34  
35  
36 22. Fiedler N, Kipen H, KellyMcNeil K, et al. Long term use of organophosphates  
37 and neuropsychological performance. American journal of industrial medicine.  
38  
39  
40  
41 1997;32(5):487-96.  
42  
43  
44  
45 23. Bazylewicz-Walczak B, Majczakowa W, Szymczak M. Behavioral effects of  
46 occupational exposure to organophosphorous pesticides in female greenhouse planting  
47 workers. Neurotoxicology. 1999;20(5):819-26. Epub 1999/12/11.  
48  
49  
50  
51  
52 24. Farahat TM, Abdelrasoul GM, Amr MM, et al. Neurobehavioural effects  
53  
54

1  
2  
3  
4  
5  
6  
7  
8  
9 among workers occupationally exposed to organophosphorous pesticides. *Occupational*  
10 *and environmental medicine*. 2003;60(4):279-86. Epub 2003/03/28.

11  
12  
13  
14 25. — Korskak RJ, Sato MM. Effects of chronic organophosphate pesticide exposure  
15 *on the central nervous system*. *Clinical toxicology*. 1977;11(1):83-95. Epub 1977/01/01.

16  
17  
18  
19 26. — Levin HS, Rodnitzky RL, Mick DL. Anxiety associated with exposure to  
20 *organophosphate compounds*. *Archives of general psychiatry*. 1976;33(2):225-8. Epub  
21 1976/02/01.

22  
23  
24  
25  
26  
27 27. — Maizlish N, Schenker M, Weisskopf C, et al. S. A behavioral evaluation of pest  
28 *control workers with short term, low level exposure to the organophosphate diazinon*.  
29 *American journal of industrial medicine*. 1987;12(2):153-72. Epub 1987/01/01.

30  
31  
32  
33  
34  
35 28. — Misra UK, Nag D, Bhushan V, et al. Clinical and biochemical changes in  
36 *chronically exposed organophosphate workers*. *Toxicology letters*. 1985;24(2-3):187-93.  
37 Epub 1985/02/01.

38  
39  
40  
41  
42  
43 29. — Ohayo Mitoko GJ, Kromhout H, Simwa JM, et al. Self reported symptoms and  
44 *inhibition of acetylcholinesterase activity among Kenyan agricultural workers*.  
45 *Occupational and environmental medicine*. 2000;57(3):195-200. Epub 2000/05/16.

46  
47  
48  
49  
50 30. — Rodnitzky RL. Occupational exposure to organophosphate pesticides: a  
51 *neurobehavioral study*. *Archives of environmental health*. 1975;30(2):98-103. Epub  
52  
53  
54

1  
2  
3  
4  
5  
6  
7  
8  
9 1975/02/01.

10  
11 31. — Srivastava AK, Gupta BN, Bihari V, et al. Clinical, biochemical and  
12 neurobehavioural studies of workers engaged in the manufacture of quinalphos. Food  
13 and chemical toxicology : an international journal published for the British Industrial  
14 Biological Research Association. 2000;38(1):65-9. Epub 2000/02/24.

15  
16  
17  
18  
19  
20  
21 32. — GA Wells BS, D O'Connell, J Peterson, et al. The Newcastle Ottawa Scale  
22 (NOS) for assessing the quality of nonrandomised studies in meta-analyses. 2010.

23  
24  
25  
26  
27 33. — Cole DC, Carpio F, Julian J, et al. Neurobehavioral outcomes among farm and  
28 nonfarm rural Ecuadorians. Neurotoxicology and teratology. 1997;19(4):277-86. Epub  
29  
30  
31  
32 1997/07/01.

33  
34  
35 34. — Fiedler N, Kipen H, Kelly McNeil K, et al. Long term use of organophosphates  
36 and neuropsychological performance. American journal of industrial medicine.  
37  
38  
39  
40 1997;32(5):487-96. Epub 1997/11/05.

41  
42  
43 35. — Ngowi AV, Maeda DN, Partanen TJ, et al. Acute health effects of  
44 organophosphorus pesticides on Tanzanian small scale coffee growers. J Expo Anal  
45 Environ Epidemiol. 2001;11(4):335-9. Epub 2001/09/26.

46  
47  
48  
49 36. — Armstrong B. Comment for the final draft. 2010.

50  
51  
52 37. — Gomes J, Lloyd O, Revitt MD, et al. Morbidity among farm workers in a desert  
53  
54

country in relation to long-term exposure to pesticides. *Scand J Work Env Hea*. 1998;24(3):213-9.

38. Griffin J, Soskolne V. Psychological distress among Thai migrant workers in Israel. *Soc Sci Med*. 2003;57(5):769-74.

1. Steenland K, Jenkins B, Ames RG, et al., O'Malley M, Chrislip D, Russo J. Chronic neurological sequelae to organophosphate pesticide poisoning. *American journal of public health*. 1994;84(5):731-6. Epub 1994/05/01.
2. Moretto A, Lotti M. Poisoning by organophosphorus insecticides and sensory neuropathy. *Journal of neurology, neurosurgery, and psychiatry*. 1998;64(4):463-8. Epub 1998/05/12.
3. Rohlman DS, Arcury TA, Quandt SA, Lasarev M, Rothlein J, Travers R, et al. Neurobehavioral performance in preschool children from agricultural and non-agricultural communities in Oregon and North Carolina. *Neurotoxicology*. 2005;26(4):589-98. Epub 2005/08/23.
4. Rastogi SK, Tripathi S, Ravishanker D. A study of neurologic symptoms on exposure to organophosphate pesticides in the children of agricultural workers. *Indian journal of occupational and environmental medicine*. 2010;14(2):54-7. Epub 2010/12/02.
5. Recio-Vega R, Ocampo-Gomez G, Borja-Aburto VH, Moran-Martinez J, Cebrian-Garcia ME, et al. Organophosphorus pesticide exposure decreases sperm quality: association between sperm parameters and urinary pesticide levels. *J Appl Toxicol*. 2008;28(5):674-80. Epub 2007/11/30.
6. Yucra S, Gasco M, Rubio J, Gonzales GF, et al. Semen quality in Peruvian pesticide applicators: association between urinary organophosphate metabolites and semen parameters. *Environ Health-Glob*. 2008;7:-.
7. Yucra S, Rubio J, Gasco M, Gonzales C, Steenland K, Gonzales GF, et al. Semen quality and reproductive sex hormone levels in Peruvian pesticide sprayers. *Int J Occup Env*

Formatted: Indent: First line: 0 ch

Heal. 2006;12(4):355-61.

8. Ovid Technologies I. Ovid SP. (~~faccess date:cited~~ 2014 23 April); Available from: <http://gateway.ovid.com/>.

9. Albers JW, Berent S, Garabrant DH, ~~Giordani B, Schweitzer SJ, Garrison RP~~, et al. The effects of occupational exposure to chlorpyrifos on the neurologic examination of central nervous system function: a prospective cohort study. *J Occup Environ Med*. 2004;46(4):367-78. Epub 2004/04/13.

10. Beseler C, Stallones L, Hoppin JA, ~~Alavanja MC, Blair A, Keefe T~~, et al. Depression and pesticide exposures in female spouses of licensed pesticide applicators in the agricultural health study cohort. *J Occup Environ Med*. 2006;48(10):1005-13. Epub 2006/10/13.

11. Cole DC, Carpio F, Julian J, ~~Leon N, Carbotte R, DeAlmeida H et al~~. Neurobehavioral outcomes among farm and nonfarm rural Ecuadorians. *Neurotoxicology and Teratology*. 1997;19(4):277-86.

12. Daniell W, Barnhart S, Demers P, ~~Costa LG, Eaton DL, Miller M~~, et al. Neuropsychological Performance among Agricultural Pesticide Applicators. *Environ Res*. 1992;59(1):217-28.

13. Dassanayake T, Gawarammana IB, Weerasinghe V, ~~Dissanayake PS, Pragaash S, Dawson A~~, et al. Auditory event-related potential changes in chronic occupational exposure to organophosphate pesticides. *Clin Neurophysiol*. 2009;120(9):1693-8. Epub 2009/08/18.

14. Farahat TM, Abdelrasoul GM, Amr MM, ~~Shebl MM, Farahat FM, Anger WK et al~~. Neurobehavioural effects among workers occupationally exposed to organophosphorous pesticides. *Occup Environ Med*. 2003;60(4):279-86.

15. Fiedler N, Kipen H, KellyMcNeil K, ~~Fenske R et al~~. Long-term use of organophosphates and neuropsychological performance. *Am J Ind Med*. 1997;32(5):487-96.

16. London L, Myers JE, Nell V, ~~Taylor T, Thompson ML et al~~. An investigation into neurologic and neurobehavioral effects of long-term agrichemical use among deciduous fruit farm workers in the Western Cape, South Africa. *Environ Res*. 1997;73(1-2):132-45.

17. Mackenzie Ross SJ, Brewin CR, Curran HV, ~~Furlong CE, Abraham-Smith KM, Harrison Vet al~~. Neuropsychological and psychiatric functioning in sheep farmers exposed to low levels of organophosphate pesticides. *Neurotoxicol Teratol*. 2010;32(4):452-9. Epub 2010/03/17.

18. Roldan-Tapia L, Parron T, Sanchez-Santed F. Neuropsychological effects of long-term exposure to organophosphate pesticides. *Neurotoxicol Teratol*. 2005;27(2):259-66. Epub 2005/03/01.

19. Stephens R, Spurgeon A, Calvert IA, ~~Beach J, Levy LS, Berry H~~, et al.

Formatted: Default Paragraph Font, Font: 10.5 pt, Check spelling and grammar



- 1  
2  
3  
4  
5  
6  
7  
8 Neuropsychological effects of long-term exposure to organophosphates in sheep dip. *Lancet*.  
9 1995;345(8958):1135-9. Epub 1995/05/06.
- 10  
11 20. Stephens R, Sreenivasan B. Neuropsychological effects of long-term low-level  
12 organophosphate exposure in orchard sprayers in England. *Arch Environ Health*.  
13 2004;59(11):566-74.
- 14  
15 21. Bazylewicz-Walczak B, Majczakowa W, Szymczak M. Behavioral effects of  
16 occupational exposure to organophosphorous pesticides in female greenhouse planting  
17 workers. *Neurotoxicology*. 1999;20(5):819-26.
- 18  
19 22. Korsak RJ, Sato MM. Effects of chronic organophosphate pesticide exposure on the  
20 central nervous system. *Clin Toxicol*. 1977;11(1):83-95. Epub 1977/01/01.
- 21  
22 23. Levin HS, Rodnitzky RL, Mick DL. Anxiety associated with exposure to  
23 organophosphate compounds. *Arch Gen Psychiatry*. 1976;33(2):225-8. Epub 1976/02/01.
- 24  
25 24. London L, Nell V, Thompson ML, ~~Myers JE et al~~. Effects of long-term  
26 organophosphate exposures on neurological symptoms, vibration sense and tremor among  
27 South African farm workers. *Scand J Work Env Hea*. 1998;24(1):18-29.
- 28  
29 25. Maizlish N, Schenker M, Weisskopf C, ~~Seiber J, Samuels S et al~~. A behavioral  
30 evaluation of pest control workers with short-term, low-level exposure to the  
31 organophosphate diazinon. *Am J Ind Med*. 1987;12(2):153-72. Epub 1987/01/01.
- 32  
33 26. Misra UK, Nag D, Bhushan V, ~~Ray PK et al~~. Clinical and biochemical changes in  
34 chronically exposed organophosphate workers. *Toxicol Lett*. 1985;24(2-3):187-93. Epub  
35 1985/02/01.
- 36  
37 27. Ohayo-Mitoko GJ, Kromhout H, Simwa JM, ~~Boleij JS, Heederik D et al~~. Self  
38 reported symptoms and inhibition of acetylcholinesterase activity among Kenyan  
39 agricultural workers. *Occup Environ Med*. 2000;57(3):195-200. Epub 2000/05/16.
- 40  
41 28. Rodnitzky RL. Occupational exposure to organophosphate pesticides: a  
42 neurobehavioral study. *Arch Environ Health*. 1975;30(2):98-103. Epub 1975/02/01.
- 43  
44 29. Srivastava AK, Gupta BN, Bihari V, ~~Mathur N, Srivastava LP, Pangtey BS, et al~~.  
45 Clinical, biochemical and neurobehavioural studies of workers engaged in the manufacture  
46 of quinalphos. *Food Chem Toxicol*. 2000;38(1):65-9.
- 47  
48 30. Steenland K, Dick RB, Howell RJ, ~~Chrislip DW, Hines CJ, Reid TM, et al~~.  
49 Neurologic function among termiticide applicators exposed to chlorpyrifos. *Environ Health*  
50 *Persp*. 2000;108(4):293-300.
- 51  
52 31. Stephens R, Spurgeon A, Berry H. Organophosphates: the relationship between  
53 chronic and acute exposure effects. *Neurotoxicology and teratology*. 1996;18(4):449-53.
- 54  
55 32. Rothlein J, Rohlman D, Lasarev M, ~~Phillips J, Muniz J, McCauley L et al~~.  
56 Organophosphate pesticide exposure and neurobehavioral performance in agricultural and  
57  
58  
59  
60

1  
2  
3  
4  
5  
6  
7  
8 non-agricultural Hispanic workers. *Environ Health Perspect*. 2006;114(5):691-6. Epub  
9 2006/05/06.

10  
11 33. Institute OHR. The Newcastle-Ottawa Scale (NOS) for assessing the quality of  
12 nonrandomised studies in meta-analyses. (~~access date:cited~~ 2014 26 April)~~];~~ Available  
13 from: [http://www.ohri.ca/programs/clinical\\_epidemiology/oxford.asp](http://www.ohri.ca/programs/clinical_epidemiology/oxford.asp).

14  
15 34. Wechsler D. Manual for the Wechsler Adult Intelligence Scale. New York:  
16 Psychological corporation; 1955: pp1- 110-p.

17  
18 35. Wechsler D. Manual for the Wechsler Adult Intelligence Scale-Revised. New York:  
19 Psychological corporation; 1981: pp1-156-p.

20  
21 36. Baker EL, Letz RE, Fidler AT, ~~Shalat S, Plantamura D, Lyndon Met al.~~ A  
22 computer-based neurobehavioral evaluation system for occupational and environmental  
23 epidemiology: methodology and validation studies. *Neurobehavioral toxicology and*  
24 *teratology*. 1985;7(4):369-77. Epub 1985/07/01.

25  
26 37. B.L. Johnson ME, C. Xintaras, E.L. Baker, ~~Jr., H. Hanninen, and A. Met al.~~  
27 Seppalainen. Prevention of neurotoxic illness in working populations. London: John Willey  
28 & Sons; 1987: pp1-274-p.

29  
30 38. Anger WK. Neurobehavioural tests and systems to assess neurotoxic exposures in  
31 the workplace and community. *Occup Environ Med*. 2003;60(7):531-8, 474. Epub 2003/06/24.

32  
33 39. Ngowi AV, Maeda DN, Partanen TJ, ~~Sanga MP, Mbise Get al.~~ Acute health effects  
34 of organophosphorus pesticides on Tanzanian small-scale coffee growers. *J Expo Anal*  
35 *Environ Epidemiol*. 2001;11(4):335-9. Epub 2001/09/26.

36  
37 40. Higgins JP, Thompson SG, Deeks JJ, ~~Altman DG et al.~~ Measuring inconsistency in  
38 meta-analyses. *BMJ*. 2003;327(7414):557-60. Epub 2003/09/06.

39  
40 41. Gomes J, Lloyd O, Revitt MD, ~~Basha Met al.~~ Morbidity among farm workers in a  
41 desert country in relation to long-term exposure to pesticides. *Scand J Work Env Hea*.  
42 1998;24(3):213-9.

Formatted: Default Paragraph Font, Font:  
10.5 pt, Check spelling and grammar

## FIGURE LEGEND

Figure 1: Flow diagram of search and review process

Figure1 represents how the selected articles were searched. After electric search was conducted with restriction of published year, human, and English, a manual search of titles and abstracts was carried out. As a result, the remaining 21 studies were fully reviewed, and 12 studies met the inclusion and exclusion criteria. Another 12 studies were found by hand search.

Formatted: Left, Line spacing: single, Widow/Orphan control

Comment [橋爪真弘1]: Figure1を見れば自明なので、説明は不要と思います。タイトルだけでよいでしょう。

1. Stephens R, Sreenivasan B. Neuropsychological effects of long-term low-level organophosphate exposure in orchard sprayers in England. *Arch Environ Health*. 2004;59(11):566-74.

4/1/2014 10:35:00 AM  
4/1/2014 10:35:00 AM

4/1/2014 10:35:00 AM

4/1/2014 10:35:00 AM

4/1/2014 10:35:00 AM

4/1/2014 10:35:00 AM

4/1/2014 10:35:00 AM

4/1/2014 10:35:00 AM

4/1/2014 10:35:00 AM

For peer review only

1  
2  
3  
4  
5  
6  
7  
8  
9  
10  
11  
12  
13  
14  
15  
16  
17  
18  
19  
20  
21  
22  
23  
24  
25  
26  
27  
28  
29  
30  
31  
32  
33  
34  
35  
36  
37  
38  
39  
40  
41  
42  
43  
44  
45  
46  
47  
48  
49  
50  
51  
52  
53  
54  
55  
56  
57  
58  
59  
60

1  
2  
3  
4  
5  
6  
7  
8  
9  
10  
11  
12  
13  
14  
15  
16  
17  
18  
19  
20  
21  
22  
23  
24  
25  
26  
27  
28  
29  
30  
31  
32  
33  
34  
35  
36  
37  
38  
39  
40  
41  
42  
43  
44  
45  
46  
47  
48  
49  
50  
51  
52  
53  
54  
55  
56  
57  
58  
59  
60

For peer review only

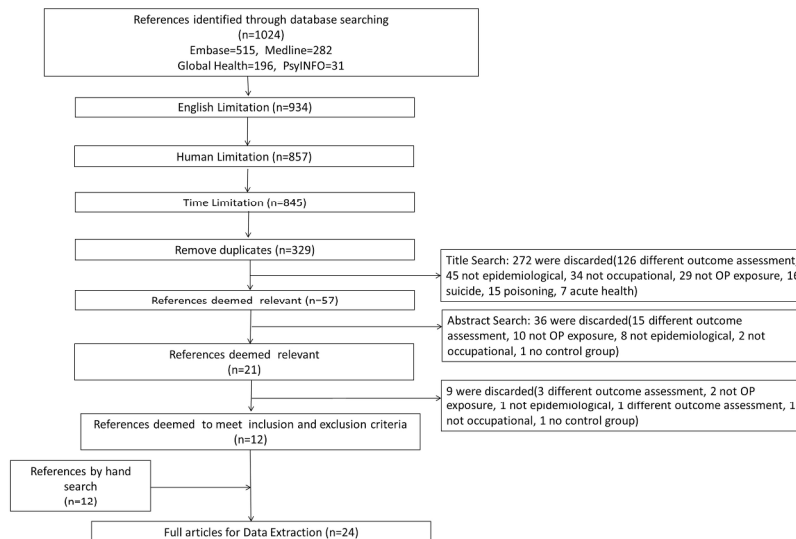

The figure1 represents the flow of database search and review process.  
299x179mm (300 x 300 DPI)

review only

## Appendix A

## The Appraisal Standard of Newcastle/Ottawa Scale

## Selection

- 1) Representativeness of the exposed group/cohort
  - a) Truly representative of the average farmers or pesticides applicators in the community\*
  - b) Somewhat representative of the average farmers or pesticides applicators in the community\*
  - c) Selected group of users (e.g. factory workers, volunteers)
  - d) No description of the derivation of the group
- 2) Selection of the non-exposed group/cohort
  - a) Drawn from the same community as the exposed group\*
  - b) Drawn from a different source
  - c) No description of the derivation of the non-exposed group
- 3) Ascertainment of exposure
  - a) Secure record (e.g. biomarkers)\*
  - b) Structured interview or questionnaire\*
  - c) Written self reports
  - d) No description
- 4) Demonstration that outcome of interest was not present at start of study (*Cohort Studies Only*)
  - a) Yes\*
  - b) No

## Confounder

- 1) Comparability of groups on the basis of the design or analysis
  - a) Study controls for age and education\*
  - b) Study controls for any additional factor\* (e.g. alcohol consumption, smoking, and first language)

## Outcome

- 1) Assessment of outcome
  - a) Independent blind assessment\*
  - b) Record linkage\*
  - c) Self reports

- 1  
2  
3 d) No description  
4  
5  
6 2) Was follow-up long enough for outcomes to occur (*Cohort Studies Only*)  
7 a) Yes (select an adequate follow up period for outcome of interest)\*  
8 b) No  
9  
10  
11 3) Adequacy of follow up of cohorts (*Cohort Studies Only*)  
12 a) Complete follow up – all subjects accounted for\*  
13 b) Subjects lost to follow up unlikely to introduce bias – small number lost - > 70% follow  
14 up, or description provided of those lost\*  
15 c) Follow up < 70% and no description of those lost  
16 d) No statement  
17  
18  
19  
20  
21  
22

23 *Case Control Studies:*

24 **Selection**

- 25 1) Is the case definition adequate?  
26 a) Yes, with independent validation\*  
27 b) Yes, e.g. record linkage on self reports  
28 c) No description  
29  
30  
31  
32  
33  
34 2) Representativeness of the cases  
35 a) Consecutive or obviously representative series of cases\*  
36 b) Potential for selection biases or non stated  
37  
38  
39  
40 3) Selection of Controls  
41 a) Community controls\*  
42 b) Hospital controls  
43 c) No description  
44  
45  
46  
47 4) Definition of Controls  
48 a) No history of disease (endpoint)\*  
49 b) No description of source  
50  
51  
52

53 **Confounder**

- 54 1) Comparability of cases and controls on the basis of design or analysis  
55 a) Study controls for age and education\*  
56 b) Study controls for any additional factor\*  
57  
58  
59  
60



**Exposure**

- 1) Ascertainment of exposure
    - a) Secure record (e.g. biomarkers)\*
    - b) Structured interview where blind to case/control status\*
    - c) Interview not blinded to case/ control status
    - d) Written self reports or medical record only
    - e) No description
  - 2) Same method of ascertainment for cases and controls
    - a) Yes\*
    - b) No
  - 3) Non-Response rate
    - a) Same rate for both groups\*
    - b) Non respondents described
    - c) Rate different and no designation
- \*: plus one point

There are five items in cross-sectional studies and eight items in cohort and case control studies, respectively. The quality of the studies was defined as follows.

*Cross-sectional Studies:*

Very Good Studies: 5 points

Good Studies: 4 points

Satisfactory Studies: 3 points

Unsatisfactory Studies: 0 to 2 points

*Cohort / Case control Studies:*

Very Good Studies: 7 to 8 points

Good Studies: 5 to 6 points

Satisfactory: 4 points

Unsatisfactory Studies: 0 to 3 points

## Appendix B

Table 1 Quality Appraisal (Cross-sectional Studies)

|                                                                                           | Cole et al<br>1997 | Dassanaya<br>ke et al<br>2009 | Farahat et<br>al 2003 | Fiedler<br>et al<br>1997 | Korsak et al<br>1977 | Levin et al<br>1976 |
|-------------------------------------------------------------------------------------------|--------------------|-------------------------------|-----------------------|--------------------------|----------------------|---------------------|
| <b>Selection</b>                                                                          |                    |                               |                       |                          |                      |                     |
| 1) Representativeness of the exposed group                                                |                    |                               |                       |                          |                      |                     |
| a) Truly representative of the average farmers or pesticides applicators in the community |                    |                               |                       |                          |                      |                     |
| b) Somewhat representative of the average or pesticides applicators in the community      | a) (+1)            | b) (+1)                       | c) (0)                | a) (+1)                  | b) (+1)              | b) (+1)             |
| c) Selected group of users                                                                |                    |                               |                       |                          |                      |                     |
| d) No description of the derivation of the group                                          |                    |                               |                       |                          |                      |                     |
| 2) Selection of the non exposed group                                                     |                    |                               |                       |                          |                      |                     |
| a) Drawn from the same community as the exposed group                                     | a) (+1)            | b) (0)                        | b) (0)                | a) (+1)                  | a) (+1)              | b) (0)              |
| b) Drawn from a different source                                                          |                    |                               |                       |                          |                      |                     |
| c) No description of the derivation of the non exposed group                              |                    |                               |                       |                          |                      |                     |
| 3) Ascertainment of exposure                                                              |                    |                               |                       |                          |                      |                     |
| a) Secured record (e.g. biomarkers)                                                       |                    |                               |                       |                          |                      |                     |
| b) Structured interview or questionnaire                                                  | b) (+1)            | d) (0)                        | a) (+1)               | b) (+1)                  | a) (+1)              | a) (+1)             |
| c) Written self report                                                                    |                    |                               |                       |                          |                      |                     |
| d) No description                                                                         |                    |                               |                       |                          |                      |                     |
| <b>Confounders</b>                                                                        |                    |                               |                       |                          |                      |                     |
| 1) Comparability of groups on the basis of the design or analysis                         | b) (+1)            | - (0)                         | a) (+1)               | - (0)                    | - (0)                | - (0)               |
| a) Study controls for age and                                                             |                    |                               |                       |                          |                      |                     |

|                                                                                                     |               |                    |                    |          |                  |                  |
|-----------------------------------------------------------------------------------------------------|---------------|--------------------|--------------------|----------|------------------|------------------|
| education                                                                                           |               |                    |                    |          |                  |                  |
| b) Study controls for any additional factor (e.g. alcohol consumption, smoking, and first language) |               |                    |                    |          |                  |                  |
| <b>Outcome</b>                                                                                      |               |                    |                    |          |                  |                  |
| 1) Assessment of outcome                                                                            |               |                    |                    |          |                  |                  |
| a) Independent blind assessment                                                                     | a) (+1)       | b) (+1)            | d) (0)             | b) (+1)  | d) (0)           | a) (+1)          |
| b) Record linkage                                                                                   |               |                    |                    |          |                  |                  |
| c) Self report                                                                                      |               |                    |                    |          |                  |                  |
| d) No description                                                                                   |               |                    |                    |          |                  |                  |
| Overall Score                                                                                       | 5/5 Very Good | 2/5 Unsatisfactory | 2/5 Unsatisfactory | 4/5 Good | 3/5 Satisfactory | 3/5 Satisfactory |

Continued...

Table 1 Continued

|                                                                                           | London et al 1997 | London et al 1998 | Maizish et al 1987 | Rodnitzky et al 1975 | Roldan-Tapia et al 2005 |
|-------------------------------------------------------------------------------------------|-------------------|-------------------|--------------------|----------------------|-------------------------|
| <b>Selection</b>                                                                          |                   |                   |                    |                      |                         |
| 1) Representativeness of the exposed group                                                |                   |                   |                    |                      |                         |
| a) Truly representative of the average farmers or pesticides applicators in the community |                   |                   |                    |                      |                         |
| b) Somewhat representative of the average or pesticides applicators in the community      | b) (+1)           | a) (+1)           | c) (0)             | c) (0)               | a) (+1)                 |
| c) Selected group of users                                                                |                   |                   |                    |                      |                         |
| d) No description of the derivation of the group                                          |                   |                   |                    |                      |                         |
| 2) Selection of the non exposed group                                                     |                   |                   |                    |                      |                         |
| a) Drawn from the same community as the exposed group                                     | a) (+1)           | a) (+1)           | a) (+1)            | c) (0)               | a) (+1)                 |
| b) Drawn from a different source                                                          |                   |                   |                    |                      |                         |
| c) No description of the derivation of the non exposed group                              |                   |                   |                    |                      |                         |

|                                                                                                     |               |          |          |                    |               |
|-----------------------------------------------------------------------------------------------------|---------------|----------|----------|--------------------|---------------|
| 3) Ascertainment of exposure                                                                        |               |          |          |                    |               |
| a) Secured record (e.g. biomarkers)                                                                 |               |          |          |                    |               |
| b) Structured interview or questionnaire                                                            | b) (+1)       | b) (+1)  | a) (+1)  | a) (+1)            | a) (+1)       |
| c) Written self report                                                                              |               |          |          |                    |               |
| d) No description                                                                                   |               |          |          |                    |               |
| <b>Confounder</b>                                                                                   |               |          |          |                    |               |
| 1) Comparability of groups on the basis of the design or analysis                                   |               |          |          |                    |               |
| a) Study controls for age and education                                                             | b) (+1)       | b) (+1)  | b) (+1)  | - (0)              | a) (+1)       |
| b) Study controls for any additional factor (e.g. alcohol consumption, smoking, and first language) |               |          |          |                    |               |
| <b>Outcome</b>                                                                                      |               |          |          |                    |               |
| 1) Assessment of outcome                                                                            |               |          |          |                    |               |
| a) Independent blind assessment                                                                     | b) (+1)       | c) (0)   | a) (+1)  | d) (0)             | a) (+1)       |
| b) Record linkage                                                                                   |               |          |          |                    |               |
| c) Self report                                                                                      |               |          |          |                    |               |
| d) No description                                                                                   |               |          |          |                    |               |
| Overall Score                                                                                       | 5/5 Very Good | 4/5 Good | 4/5 Good | 1/5 Unsatisfactory | 5/5 Very Good |

Continued...

Table 1 Continued

|                                                                                           | Rothlein et al 2006 | Srivastava et al 2000 | Steenland et al 2000 | Stephens et al 1995 | Stephens et al 1996 | Stephens et al 2004 |
|-------------------------------------------------------------------------------------------|---------------------|-----------------------|----------------------|---------------------|---------------------|---------------------|
| <b>Selection</b>                                                                          |                     |                       |                      |                     |                     |                     |
| 1) Representativeness of the exposed group                                                |                     |                       |                      |                     |                     |                     |
| a) Truly representative of the average farmers or pesticides applicators in the community | b) (+1)             | c) (0)                | a) (+1)              | a) (+1)             | a) (+1)             | a) (+1)             |
| b) Somewhat representative of the average or pesticides applicators in the community      |                     |                       |                      |                     |                     |                     |
| c) Selected group of users                                                                |                     |                       |                      |                     |                     |                     |
| d) No description of the derivation of the group                                          |                     |                       |                      |                     |                     |                     |

|                                                                                                     |               |                    |               |          |          |          |
|-----------------------------------------------------------------------------------------------------|---------------|--------------------|---------------|----------|----------|----------|
| 2) Selection of the non exposed group                                                               |               |                    |               |          |          |          |
| a) Drawn from the same community as the exposed group                                               | a) (+1)       | a) (+1)            | a) (+1)       | a) (+1)  | a) (+1)  | a) (+1)  |
| b) Drawn from a different source                                                                    |               |                    |               |          |          |          |
| c) No description of the derivation of the non exposed group                                        |               |                    |               |          |          |          |
| 3) Ascertainment of exposure                                                                        |               |                    |               |          |          |          |
| a) Secured record (e.g. biomarkers)                                                                 |               |                    |               |          |          |          |
| b) Structured interview or questionnaire                                                            | b) (+1)       | a) (+1)            | a) (+1)       | c) (0)   | a) (+1)  | b) (+1)  |
| C) Written self report                                                                              |               |                    |               |          |          |          |
| d) No description                                                                                   |               |                    |               |          |          |          |
| <b>Confounder</b>                                                                                   |               |                    |               |          |          |          |
| 1) Comparability of groups on the basis of the design or analysis                                   |               |                    |               |          |          |          |
| a) Study controls for age and education                                                             | a) (+1)       | - (0)              | b) (+1)       | b) (+1)  | b) (+1)  | - (0)    |
| b) Study controls for any additional factor (e.g. alcohol consumption, smoking, and first language) |               |                    |               |          |          |          |
| <b>Outcome</b>                                                                                      |               |                    |               |          |          |          |
| 1) Assessment of outcome                                                                            |               |                    |               |          |          |          |
| a) Independent blind assessment                                                                     | b) (+1)       | d) (0)             | a) (+1)       | b) (+1)  | d) (0)   | b) (+1)  |
| b) Record linkage                                                                                   |               |                    |               |          |          |          |
| c) Self report                                                                                      |               |                    |               |          |          |          |
| d) No description                                                                                   |               |                    |               |          |          |          |
| Overall Score                                                                                       | 5/5 Very good | 2/5 Unsatisfactory | 5/5 Very Good | 4/5 Good | 4/5 Good | 4/5 Good |

Table 2 Quality Appraisal (Cohort Studies)

|                                                                                           | Albers et al<br>2004 | Bazylewic<br>z-Walczak<br>et al 1999 | Daniell et<br>al 1992 | Ohayo-Mit<br>oko et al<br>2000 | Misra et al<br>1985 | Ross et al<br>2010 |
|-------------------------------------------------------------------------------------------|----------------------|--------------------------------------|-----------------------|--------------------------------|---------------------|--------------------|
| <b>Selection</b>                                                                          |                      |                                      |                       |                                |                     |                    |
| 1) Representativeness of the exposed cohort                                               |                      |                                      |                       |                                |                     |                    |
| a) Truly representative of the average farmers or pesticides applicators in the community |                      |                                      |                       |                                |                     |                    |
| b) Somewhat representative of the average or pesticides applicators in the community      | c) (0)               | c) (0)                               | a) (+1)               | b) (+1)                        | c) (0)              | a) (+1)            |
| c) Selected group of users                                                                |                      |                                      |                       |                                |                     |                    |
| d) No description of the derivation of the cohort                                         |                      |                                      |                       |                                |                     |                    |
| 2) Selection of the non exposed cohort                                                    |                      |                                      |                       |                                |                     |                    |
| a) Drawn from the same community as the exposed cohort                                    |                      |                                      |                       |                                |                     |                    |
| b) Drawn from a different source                                                          | b) (0)               | a) (+1)                              | b) (0)                | a) (+1)                        | b) (0)              | b) (0)             |
| c) No description of the derivation of the non exposed cohort                             |                      |                                      |                       |                                |                     |                    |
| 3) Ascertainment of exposure                                                              |                      |                                      |                       |                                |                     |                    |
| a) Secured record (e.g. biomarkers)                                                       |                      |                                      |                       |                                |                     |                    |
| b) Structured interview or questionnaire                                                  | a) (+1)              | a) (+1)                              | a) (+1)               | b) (+1)                        | a) (+1)             | b) (+1)            |
| c) Written self report                                                                    |                      |                                      |                       |                                |                     |                    |
| d) No description                                                                         |                      |                                      |                       |                                |                     |                    |
| 4) Demonstration that outcome of interest was not present at start of study               |                      |                                      |                       |                                |                     |                    |
| a) Yes                                                                                    | a) (+1)              | a) (+1)                              | a) (+1)               | a) (+1)                        | a) (+1)             | a) (+1)            |
| b) No                                                                                     |                      |                                      |                       |                                |                     |                    |
| <b>Confounders</b>                                                                        |                      |                                      |                       |                                |                     |                    |
| 1) Comparability of groups on the basis of the design or analysis                         |                      |                                      |                       |                                |                     |                    |
| a) Study controls for age and education                                                   | - (0)                | a) (+1)                              | b) (+1)               | - (0)                          | a) (+1)             | a) (+1)            |
| b) Study controls for any additional factor (e.g. alcohol consumption,                    |                      |                                      |                       |                                |                     |                    |

smoking, and first language)

Continued...

Table 2 Continued

|                                                                                                                                    |                     |             |             |                     |                       |             |
|------------------------------------------------------------------------------------------------------------------------------------|---------------------|-------------|-------------|---------------------|-----------------------|-------------|
| <b>Outcome</b>                                                                                                                     |                     |             |             |                     |                       |             |
| 1) Assessment of outcome                                                                                                           |                     |             |             |                     |                       |             |
| a) Independent blind assessment                                                                                                    | b) (+1)             | d) (0)      | d) (0)      | c) (0)              | d) (0)                | d) (0)      |
| b) Record linkage                                                                                                                  |                     |             |             |                     |                       |             |
| c) Self report                                                                                                                     |                     |             |             |                     |                       |             |
| d) No description                                                                                                                  |                     |             |             |                     |                       |             |
| 2) Was follow-up long enough for outcomes to occur                                                                                 |                     |             |             |                     |                       |             |
| a) Yes (select adequate follow up period for outcome of interest)                                                                  | b) (0)              | b) (0)      | b) (0)      | b) (0)              | b) (0)                | a) (+1)     |
| b) No                                                                                                                              |                     |             |             |                     |                       |             |
| 3) Adequacy of follow up of cohorts                                                                                                |                     |             |             |                     |                       |             |
| a) Complete follow up-all subjects accounted for                                                                                   |                     |             |             |                     |                       |             |
| b) Subjects lost to follow up unlikely to introduce bias- small number lost- >70% follow up, or description provided of those lost | b) (+1)             | a) (+1)     | a) (+1)     | c) (0)              | d) (0)                | d) (0)      |
| c) Follow up rate<70% and no description of those lost                                                                             |                     |             |             |                     |                       |             |
| d) No statement                                                                                                                    |                     |             |             |                     |                       |             |
| Overall Score                                                                                                                      | 4/8<br>Satisfactory | 5/8<br>Good | 5/8<br>Good | 4/8<br>Satisfactory | 3/8<br>Unsatisfactory | 5/8<br>Good |

**Table 3 Quality Appraisal (Case-control Studies)**

|                                                                           | Beseler et al 2006 |
|---------------------------------------------------------------------------|--------------------|
| <b>Selection</b>                                                          |                    |
| 1) Is the case definition adequate?                                       |                    |
| a) Yes, with independent validation                                       |                    |
| b) Yes, e.g. record linkage or based on self reports                      | b) (0)             |
| C) No description                                                         |                    |
| 2) Representativeness of the cases                                        |                    |
| a) Consecutive or obviously representative series of cases                | a) (+1)            |
| b) Potential for selection biases or not stated                           |                    |
| 3) Selection of Controls                                                  |                    |
| a) Community controls                                                     |                    |
| b) Hospital controls                                                      | a) (+1)            |
| C) No description                                                         |                    |
| 4) Definition of Controls                                                 |                    |
| a) No history of disease (endpoint)                                       | a) (+1)            |
| b) No description of source                                               |                    |
| <b>Confounders</b>                                                        |                    |
| 1) Comparability of cases and controls on the basis of design or analysis |                    |
| a) Study control for age and education                                    |                    |
| b) Study controls for any additional factor                               | b) (+1)            |
| <b>Exposure</b>                                                           |                    |
| 1) Ascertainment of exposure                                              |                    |
| a) Secure record(biomarkers)                                              |                    |
| b) Structured interview where blind to case/control status                |                    |
| c) Interview not blinded to case/control status                           |                    |
| d) Written self report or medical record only                             | d) (0)             |



1  
2  
3  
4  
5  
6  
7  
8  
9  
10  
11  
12  
13  
14  
15  
16  
17  
18  
19  
20  
21  
22  
23  
24  
25  
26  
27  
28  
29  
30  
31  
32  
33  
34  
35  
36  
37  
38  
39  
40  
41  
42  
43  
44  
45  
46  
47  
48  
49  
50  
51  
52  
53  
54  
55  
56  
57  
58  
59  
60

| e) No description | |

Continued...

Table3 Continued

|                                                                                                      |             |
|------------------------------------------------------------------------------------------------------|-------------|
| 2) Same method of ascertainment for cases and controls                                               | a) Yes      |
| a) Yes<br>b) No                                                                                      |             |
| 3) Non-response rate                                                                                 | b) (0)      |
| a) Same rate for both groups<br>b) Non respondents described<br>c) Rate different and no designation |             |
| Overall Score                                                                                        |             |
|                                                                                                      | 5/8<br>Good |

For peer review only

1  
2  
3  
4  
5  
6  
7  
8  
9  
10  
11  
12  
13  
14  
15  
16  
17  
18  
19  
20  
21  
22  
23  
24  
25  
26  
27  
28  
29  
30  
31  
32  
33  
34  
35  
36  
37  
38  
39  
40  
41  
42  
43  
44  
45  
46  
47  
48  
49  
50  
51  
52  
53  
54  
55  
56  
57  
58  
59  
60

For peer review only

| MOOSE Checklist                   |                                                                                                                                                                                                                                                                 |       |
|-----------------------------------|-----------------------------------------------------------------------------------------------------------------------------------------------------------------------------------------------------------------------------------------------------------------|-------|
| Section/Topic                     | Checklist items                                                                                                                                                                                                                                                 | Check |
| <b>Title</b>                      | • Identify the study as a meta-analysis (or systematic review)                                                                                                                                                                                                  | X     |
| <b>Abstract</b>                   | • Use the journal's structured format                                                                                                                                                                                                                           | X     |
| <b>Introduction (Present)</b>     | • The clinical problem                                                                                                                                                                                                                                          | X     |
|                                   | • The hypothesis                                                                                                                                                                                                                                                | X     |
|                                   | • A statement of objectives that includes the study population, the condition of interest, the exposure or intervention, and the outcome(s) considered                                                                                                          | X     |
| <b>Sources (Describe)</b>         | • Qualifications of searchers (eg, librarians and investigators)                                                                                                                                                                                                | X     |
|                                   | • Search strategy, including time period included in the synthesis and keywords                                                                                                                                                                                 | X     |
|                                   | • Effort to include all available studies, including contact with authors                                                                                                                                                                                       | X     |
|                                   | • Databases and registries searched                                                                                                                                                                                                                             | X     |
|                                   | • Search software used, name and version, including special features used (eg, explosion)                                                                                                                                                                       | X     |
|                                   | • Use of hand searching (eg, reference lists of obtained articles)                                                                                                                                                                                              | X     |
|                                   | • List of citations located and those excluded, including justification                                                                                                                                                                                         | X     |
|                                   | • Method of addressing articles published in languages other than English                                                                                                                                                                                       | X     |
| <b>Study Selection (Describe)</b> | • Method of handling abstracts and unpublished studies                                                                                                                                                                                                          | X     |
|                                   | • Description of any contact with authors                                                                                                                                                                                                                       | X     |
|                                   | • Types of study designs considered                                                                                                                                                                                                                             | X     |
|                                   | • Relevance or appropriateness of studies gathered for assessing the hypothesis to be tested                                                                                                                                                                    | X     |
|                                   | • Rationale for the selection and coding of data (eg, sound clinical principles or convenience)                                                                                                                                                                 | X     |
|                                   | • Documentation of how data were classified and coded (eg, multiple raters, blinding, and interrater reliability)                                                                                                                                               | X     |
|                                   | • Assessment of confounding (eg, comparability of cases and controls in studies where appropriate)                                                                                                                                                              | X     |
|                                   | • Assessment of study quality, including blinding of quality assessors; stratification or regression on possible predictors of study results                                                                                                                    | X     |
| <b>Results (Present)</b>          | • Assessment of heterogeneity                                                                                                                                                                                                                                   | N/A   |
|                                   | • Statistical methods (eg, complete description of fixed or random effects models, justification of whether the chosen models account for predictors of study results, dose-response models, or cumulative meta-analysis) in sufficient detail to be replicated | N/A   |
|                                   | • A graph summarizing individual study estimates and the overall estimate                                                                                                                                                                                       | X     |
|                                   | • A table giving descriptive information for each included study                                                                                                                                                                                                | X     |
|                                   | • Results of sensitivity testing (eg, subgroup analysis)                                                                                                                                                                                                        | X     |
|                                   | • Indication of statistical uncertainty of findings                                                                                                                                                                                                             | X     |
| <b>Discussion (Discuss)</b>       | • Strengths and weaknesses                                                                                                                                                                                                                                      | X     |
|                                   | • Potential biases in the review process (eg, publication bias)                                                                                                                                                                                                 | X     |
|                                   | • Justification for exclusion (eg, exclusion of non-English-language citations)                                                                                                                                                                                 | X     |
|                                   | • Assessment of quality of included studies                                                                                                                                                                                                                     | X     |
|                                   | • Consideration of alternative explanations for observed results                                                                                                                                                                                                | X     |
|                                   | • Generalization of the conclusions (ie, appropriate for the data presented and within the domain of the literature review)                                                                                                                                     | X     |
|                                   | • Guidelines for future research                                                                                                                                                                                                                                | X     |
|                                   | • Disclosure of funding source                                                                                                                                                                                                                                  | X     |

N/A: Not Applicable
