# Supplementary material for: A systematic review of the influence of occupational organophosphate pesticides exposure on neurological impairment
Source: HighWire-hosted journal article supplement (doi:10.1136/bmjopen-2014-004798), 2014-06-01
Supplement: bmjopen-2014-004798supp.pdf [file bmjopen-2014-004798supp.pdf]

**Appendix A**  
**The Appraisal Standard of Newcastle/Ottawa Scale**

**Selection**

- 1) Representativeness of the exposed group/cohort
  - a) Truly representative of the average farmers or pesticides applicators in the community\*
  - b) Somewhat representative of the average farmers or pesticides applicators in the community\*
  - c) Selected group of users (e.g. factory workers, volunteers)
  - d) No description of the derivation of the group
  
- 2) Selection of the non-exposed group/cohort
  - a) Drawn from the same community as the exposed group\*
  - b) Drawn from a different source
  - c) No description of the derivation of the non-exposed group
  
- 3) Ascertainment of exposure
  - a) Secure record (e.g. biomarkers)\*
  - b) Structured interview or questionnaire\*
  - c) Written self reports
  - d) No description
  
- 4) Demonstration that outcome of interest was not present at start of study (*Cohort Studies Only*)
  - a) Yes\*
  - b) No

**Confounder**

- 1) Comparability of groups on the basis of the design or analysis
  - a) Study controls for age and education\*
  - b) Study controls for any additional factor\* (e.g. alcohol consumption, smoking, and first language)

**Outcome**

- 1) Assessment of outcome
  - a) Independent blind assessment\*
  - b) Record linkage\*
  - c) Self reports

- d) No description
- 2) Was follow-up long enough for outcomes to occur (*Cohort Studies Only*)
    - a) Yes (select an adequate follow up period for outcome of interest)\*
    - b) No
  - 3) Adequacy of follow up of cohorts (*Cohort Studies Only*)
    - a) Complete follow up – all subjects accounted for\*
    - b) Subjects lost to follow up unlikely to introduce bias – small number lost - > 70% follow up, or description provided of those lost\*
    - c) Follow up < 70% and no description of those lost
    - d) No statement

*Case Control Studies:*

**Selection**

- 1) Is the case definition adequate?
  - a) Yes, with independent validation\*
  - b) Yes, e.g. record linkage on self reports
  - c) No description
- 2) Representativeness of the cases
  - a) Consecutive or obviously representative series of cases\*
  - b) Potential for selection biases or non stated
- 3) Selection of Controls
  - a) Community controls\*
  - b) Hospital controls
  - c) No description
- 4) Definition of Controls
  - a) No history of disease (endpoint)\*
  - b) No description of source

**Confounder**

- 1) Comparability of cases and controls on the basis of design or analysis
  - a) Study controls for age and education\*
  - b) Study controls for any additional factor\*

## **Exposure**

- 1) Ascertainment of exposure
    - a) Secure record (e.g. biomarkers)\*
    - b) Structured interview where blind to case/control status\*
    - c) Interview not blinded to case/ control status
    - d) Written self reports or medical record only
    - e) No description
  
  - 2) Same method of ascertainment for cases and controls
    - a) Yes\*
    - b) No
  
  - 3) Non-Response rate
    - a) Same rate for both groups\*
    - b) Non respondents described
    - c) Rate different and no designation
- \*: plus one point

There are five items in cross-sectional studies and eight items in cohort and case control studies, respectively. The quality of the studies was defined as follows.

### *Cross-sectional Studies:*

Very Good Studies: 5 points

Good Studies: 4 points

Satisfactory Studies: 3 points

Unsatisfactory Studies: 0 to 2 points

### *Cohort / Case control Studies:*

Very Good Studies: 7 to 8 points

Good Studies: 5 to 6 points

Satisfactory: 4 points

Unsatisfactory Studies: 0 to 3 points

## Appendix B

**Table1 Quality Appraisal (Cross-sectional Studies)**

|                                                                                           | Cole et al<br>1997 | Dassanaya<br>ke et al<br>2009 | Farahat et<br>al 2003 | Fiedler<br>et al<br>1997 | Korsak et al<br>1977 | Levin et al<br>1976 |
|-------------------------------------------------------------------------------------------|--------------------|-------------------------------|-----------------------|--------------------------|----------------------|---------------------|
| <b>Selection</b>                                                                          |                    |                               |                       |                          |                      |                     |
| 1) Representativeness of the exposed group                                                |                    |                               |                       |                          |                      |                     |
| a) Truly representative of the average farmers or pesticides applicators in the community |                    |                               |                       |                          |                      |                     |
| b) Somewhat representative of the average or pesticides applicators in the community      | a) (+1)            | b) (+1)                       | c) (0)                | a) (+1)                  | b) (+1)              | b) (+1)             |
| c) Selected group of users                                                                |                    |                               |                       |                          |                      |                     |
| d) No description of the derivation of the group                                          |                    |                               |                       |                          |                      |                     |
| 2) Selection of the non exposed group                                                     |                    |                               |                       |                          |                      |                     |
| a) Drawn from the same community as the exposed group                                     |                    |                               |                       |                          |                      |                     |
| b) Drawn from a different source                                                          | a) (+1)            | b) (0)                        | b) (0)                | a) (+1)                  | a) (+1)              | b) (0)              |
| c) No description of the derivation of the non exposed group                              |                    |                               |                       |                          |                      |                     |
| 3) Ascertainment of exposure                                                              |                    |                               |                       |                          |                      |                     |
| a) Secured record (e.g. biomarkers)                                                       |                    |                               |                       |                          |                      |                     |
| b) Structured interview or questionnaire                                                  | b) (+1)            | d) (0)                        | a) (+1)               | b) (+1)                  | a) (+1)              | a) (+1)             |
| c) Written self report                                                                    |                    |                               |                       |                          |                      |                     |
| d) No description                                                                         |                    |                               |                       |                          |                      |                     |
| <b>Confounders</b>                                                                        |                    |                               |                       |                          |                      |                     |
| 1) Comparability of groups on the basis of the design or analysis                         | b) (+1)            | - (0)                         | a) (+1)               | - (0)                    | - (0)                | - (0)               |
| a) Study controls for age and                                                             |                    |                               |                       |                          |                      |                     |

|                                                                                                     |               |                    |                    |          |                  |                  |
|-----------------------------------------------------------------------------------------------------|---------------|--------------------|--------------------|----------|------------------|------------------|
| education                                                                                           |               |                    |                    |          |                  |                  |
| b) Study controls for any additional factor (e.g. alcohol consumption, smoking, and first language) |               |                    |                    |          |                  |                  |
| <b>Outcome</b>                                                                                      |               |                    |                    |          |                  |                  |
| 1) Assessment of outcome                                                                            |               |                    |                    |          |                  |                  |
| a) Independent blind assessment                                                                     | a) (+1)       | b) (+1)            | d) (0)             | b) (+1)  | d) (0)           | a) (+1)          |
| b) Record linkage                                                                                   |               |                    |                    |          |                  |                  |
| c) Self report                                                                                      |               |                    |                    |          |                  |                  |
| d) No description                                                                                   |               |                    |                    |          |                  |                  |
| Overall Score                                                                                       | 5/5 Very Good | 2/5 Unsatisfactory | 2/5 Unsatisfactory | 4/5 Good | 3/5 Satisfactory | 3/5 Satisfactory |

Continued...

Table1 Continued

|                                                                                           | London et al 1997 | London et al 1998 | Maizish et al 1987 | Rodnitzky et l 1975 | Roldan-Tapia et al 2005 |
|-------------------------------------------------------------------------------------------|-------------------|-------------------|--------------------|---------------------|-------------------------|
| <b>Selection</b>                                                                          |                   |                   |                    |                     |                         |
| 1) Representativeness of the exposed group                                                |                   |                   |                    |                     |                         |
| a) Truly representative of the average farmers or pesticides applicators in the community |                   |                   |                    |                     |                         |
| b) Somewhat representative of the average or pesticides applicators in the community      | b) (+1)           | a) (+1)           | c) (0)             | c) (0)              | a) (+1)                 |
| c) Selected group of users                                                                |                   |                   |                    |                     |                         |
| d) No description of the derivation of the group                                          |                   |                   |                    |                     |                         |
| 2) Selection of the non exposed group                                                     |                   |                   |                    |                     |                         |
| a) Drawn from the same community as the exposed group                                     | a) (+1)           | a) (+1)           | a) (+1)            | c) (0)              | a) (+1)                 |
| b) Drawn from a different source                                                          |                   |                   |                    |                     |                         |
| c) No description of the derivation of the non exposed group                              |                   |                   |                    |                     |                         |

|                                                                                                     |               |          |          |                    |               |
|-----------------------------------------------------------------------------------------------------|---------------|----------|----------|--------------------|---------------|
| 3) Ascertainment of exposure                                                                        |               |          |          |                    |               |
| a) Secured record (e.g. biomarkers)                                                                 |               |          |          |                    |               |
| b) Structured interview or questionnaire                                                            | b) (+1)       | b) (+1)  | a) (+1)  | a) (+1)            | a) (+1)       |
| C) Written self report                                                                              |               |          |          |                    |               |
| d) No description                                                                                   |               |          |          |                    |               |
| <b>Confounder</b>                                                                                   |               |          |          |                    |               |
| 1) Comparability of groups on the basis of the design or analysis                                   |               |          |          |                    |               |
| a) Study controls for age and education                                                             | b) (+1)       | b) (+1)  | b) (+1)  | - (0)              | a) (+1)       |
| b) Study controls for any additional factor (e.g. alcohol consumption, smoking, and first language) |               |          |          |                    |               |
| <b>Outcome</b>                                                                                      |               |          |          |                    |               |
| 1) Assessment of outcome                                                                            |               |          |          |                    |               |
| a) Independent blind assessment                                                                     | b) (+1)       | c) (0)   | a) (+1)  | d) (0)             | a) (+1)       |
| b) Record linkage                                                                                   |               |          |          |                    |               |
| c) Self report                                                                                      |               |          |          |                    |               |
| d) No description                                                                                   |               |          |          |                    |               |
| Overall Score                                                                                       | 5/5 Very Good | 4/5 Good | 4/5 Good | 1/5 Unsatisfactory | 5/5 Very Good |

Continued...

Table1 Continued

|                                                                                           | Rothlein<br>et al<br>2006 | Srivastava<br>et al 2000 | Steenland<br>et al 2000 | Stephens<br>et al<br>1995 | Stephens<br>et al<br>1996 | Stephens<br>et al 2004 |
|-------------------------------------------------------------------------------------------|---------------------------|--------------------------|-------------------------|---------------------------|---------------------------|------------------------|
| <b>Selection</b>                                                                          |                           |                          |                         |                           |                           |                        |
| 1) Representativeness of the exposed group                                                |                           |                          |                         |                           |                           |                        |
| a) Truly representative of the average farmers or pesticides applicators in the community |                           |                          |                         |                           |                           |                        |
| b) Somewhat representative of the average or pesticides applicators in the community      | b) (+1)                   | c) (0)                   | a) (+1)                 | a) (+1)                   | a) (+1)                   | a) (+1)                |
| c) Selected group of users                                                                |                           |                          |                         |                           |                           |                        |
| d) No description of the derivation of the group                                          |                           |                          |                         |                           |                           |                        |

|                                                                                                     |               |                    |               |          |          |          |
|-----------------------------------------------------------------------------------------------------|---------------|--------------------|---------------|----------|----------|----------|
| 2) Selection of the non exposed group                                                               |               |                    |               |          |          |          |
| a) Drawn from the same community as the exposed group                                               | a) (+1)       | a) (+1)            | a) (+1)       | a) (+1)  | a) (+1)  | a) (+1)  |
| b) Drawn from a different source                                                                    |               |                    |               |          |          |          |
| c) No description of the derivation of the non exposed group                                        |               |                    |               |          |          |          |
| 3) Ascertainment of exposure                                                                        |               |                    |               |          |          |          |
| a) Secured record (e.g. biomarkers)                                                                 |               |                    |               |          |          |          |
| b) Structured interview or questionnaire                                                            | b) (+1)       | a) (+1)            | a) (+1)       | c) (0)   | a) (+1)  | b) (+1)  |
| C) Written self report                                                                              |               |                    |               |          |          |          |
| d) No description                                                                                   |               |                    |               |          |          |          |
| <b>Confounder</b>                                                                                   |               |                    |               |          |          |          |
| 1) Comparability of groups on the basis of the design or analysis                                   |               |                    |               |          |          |          |
| a) Study controls for age and education                                                             | a) (+1)       | - (0)              | b) (+1)       | b) (+1)  | b) (+1)  | - (0)    |
| b) Study controls for any additional factor (e.g. alcohol consumption, smoking, and first language) |               |                    |               |          |          |          |
| <b>Outcome</b>                                                                                      |               |                    |               |          |          |          |
| 1) Assessment of outcome                                                                            |               |                    |               |          |          |          |
| a) Independent blind assessment                                                                     | b) (+1)       | d) (0)             | a) (+1)       | b) (+1)  | d) (0)   | b) (+1)  |
| b) Record linkage                                                                                   |               |                    |               |          |          |          |
| c) Self report                                                                                      |               |                    |               |          |          |          |
| d) No description                                                                                   |               |                    |               |          |          |          |
| Overall Score                                                                                       | 5/5 Very good | 2/5 Unsatisfactory | 5/5 Very Good | 4/5 Good | 4/5 Good | 4/5 Good |

**Table2 Quality Appraisal (Cohort Studies)**

|                                                                                           | Albers et al<br>2004 | Bazylewic<br>z-Walczak<br>et al 1999 | Daniell et<br>al 1992 | Ohayo-Mit<br>oko et al<br>2000 | Misra et al<br>1985 | Ross et al<br>2010 |
|-------------------------------------------------------------------------------------------|----------------------|--------------------------------------|-----------------------|--------------------------------|---------------------|--------------------|
| <b>Selection</b>                                                                          |                      |                                      |                       |                                |                     |                    |
| 1) Representativeness of the exposed cohort                                               |                      |                                      |                       |                                |                     |                    |
| a) Truly representative of the average farmers or pesticides applicators in the community |                      |                                      |                       |                                |                     |                    |
| b) Somewhat representative of the average or pesticides applicators in the community      | c) (0)               | c) (0)                               | a) (+1)               | b) (+1)                        | c) (0)              | a) (+1)            |
| c) Selected group of users                                                                |                      |                                      |                       |                                |                     |                    |
| d) No description of the derivation of the cohort                                         |                      |                                      |                       |                                |                     |                    |
| 2) Selection of the non exposed cohort                                                    |                      |                                      |                       |                                |                     |                    |
| a) Drawn from the same community as the exposed cohort                                    |                      |                                      |                       |                                |                     |                    |
| b) Drawn from a different source                                                          | b) (0)               | a) (+1)                              | b) (0)                | a) (+1)                        | b) (0)              | b) (0)             |
| c) No description of the derivation of the non exposed cohort                             |                      |                                      |                       |                                |                     |                    |
| 3) Ascertainment of exposure                                                              |                      |                                      |                       |                                |                     |                    |
| a) Secured record (e.g. biomarkers)                                                       |                      |                                      |                       |                                |                     |                    |
| b) Structured interview or questionnaire                                                  | a) (+1)              | a) (+1)                              | a) (+1)               | b) (+1)                        | a) (+1)             | b) (+1)            |
| c) Written self report                                                                    |                      |                                      |                       |                                |                     |                    |
| d) No description                                                                         |                      |                                      |                       |                                |                     |                    |
| 4) Demonstration that outcome of interest was not present at start of study               |                      |                                      |                       |                                |                     |                    |
| a) Yes                                                                                    | a) (+1)              | a) (+1)                              | a) (+1)               | a) (+1)                        | a) (+1)             | a) (+1)            |
| b) No                                                                                     |                      |                                      |                       |                                |                     |                    |
| <b>Confounders</b>                                                                        |                      |                                      |                       |                                |                     |                    |
| 1) Comparability of groups on the basis of the design or analysis                         |                      |                                      |                       |                                |                     |                    |
| a) Study controls for age and education                                                   | - (0)                | a) (+1)                              | b) (+1)               | - (0)                          | a) (+1)             | a) (+1)            |
| b) Study controls for any additional factor (e.g. alcohol consumption,                    |                      |                                      |                       |                                |                     |                    |



|                              |  |  |  |  |  |  |
|------------------------------|--|--|--|--|--|--|
| smoking, and first language) |  |  |  |  |  |  |
|------------------------------|--|--|--|--|--|--|

Continued...

Table2 Continued

|                                                                                                                                    |                     |             |             |                     |                       |             |
|------------------------------------------------------------------------------------------------------------------------------------|---------------------|-------------|-------------|---------------------|-----------------------|-------------|
| <b>Outcome</b>                                                                                                                     |                     |             |             |                     |                       |             |
| 1) Assessment of outcome                                                                                                           |                     |             |             |                     |                       |             |
| a) Independent blind assessment                                                                                                    | b) (+1)             | d) (0)      | d) (0)      | c) (0)              | d) (0)                | d) (0)      |
| b) Record linkage                                                                                                                  |                     |             |             |                     |                       |             |
| c) Self report                                                                                                                     |                     |             |             |                     |                       |             |
| d) No description                                                                                                                  |                     |             |             |                     |                       |             |
| 2) Was follow-up long enough for outcomes to occur                                                                                 |                     |             |             |                     |                       |             |
| a) Yes (select adequate follow up period for outcome of interest)                                                                  | b) (0)              | b) (0)      | b) (0)      | b) (0)              | b) (0)                | a) (+1)     |
| b) No                                                                                                                              |                     |             |             |                     |                       |             |
| 3) Adequacy of follow up of cohorts                                                                                                |                     |             |             |                     |                       |             |
| a) Complete follow up-all subjects accounted for                                                                                   | b) (+1)             | a) (+1)     | a) (+1)     | c) (0)              | d) (0)                | d) (0)      |
| b) Subjects lost to follow up unlikely to introduce bias- small number lost- >70% follow up, or description provided of those lost |                     |             |             |                     |                       |             |
| c) Follow up rate<70% and no description of those lost                                                                             |                     |             |             |                     |                       |             |
| d) No statement                                                                                                                    |                     |             |             |                     |                       |             |
| Overall Score                                                                                                                      | 4/8<br>Satisfactory | 5/8<br>Good | 5/8<br>Good | 4/8<br>Satisfactory | 3/8<br>Unsatisfactory | 5/8<br>Good |

**Table3 Quality Appraisal (Case-control Studies)**

|                                                                                                                                                                                               |                    |
|-----------------------------------------------------------------------------------------------------------------------------------------------------------------------------------------------|--------------------|
| <b>Selection</b>                                                                                                                                                                              | Beseler et al 2006 |
| 1) Is the case definition adequate?                                                                                                                                                           | b) (0)             |
| a) Yes, with independent validation                                                                                                                                                           |                    |
| b) Yes, e.g. record linkage or based on self reports<br>C) No description                                                                                                                     |                    |
| 2) Representativeness of the cases                                                                                                                                                            | a) (+1)            |
| a) Consecutive or obviously representative series of cases<br>b) Potential for selection biases or not stated                                                                                 |                    |
| 3) Selection of Controls                                                                                                                                                                      | a) (+1)            |
| a) Community controls<br>b) Hospital controls<br>C) No description                                                                                                                            |                    |
| 4) Definition of Controls                                                                                                                                                                     |                    |
| a) No history of disease (endpoint)<br>b) No description of source                                                                                                                            | a) (+1)            |
| <b>Confounders</b>                                                                                                                                                                            | b) (+1)            |
| 1) Comparability of cases and controls on the basis of design or analysis                                                                                                                     |                    |
| a) Study control for age and education<br>b) Study controls for any additional factor                                                                                                         |                    |
| <b>Exposure</b>                                                                                                                                                                               | d) (0)             |
| 1) Ascertainment of exposure                                                                                                                                                                  |                    |
| a) Secure record(biomarkers)<br>b)Structured interview where blind to case/control status<br>c) Interview not blinded to case/control status<br>d) Written self report or medical record only |                    |
|                                                                                                                                                                                               |                    |

e) No description

Continued...

Table3 Continued

|                                                                                                      |             |
|------------------------------------------------------------------------------------------------------|-------------|
| 2) Same method of ascertainment for cases and controls                                               | a) Yes      |
| a) Yes<br>b) No                                                                                      |             |
| 3) Non-response rate                                                                                 | b) (0)      |
| a) Same rate for both groups<br>b) Non respondents described<br>c) Rate different and no designation |             |
| Overall Score                                                                                        |             |
|                                                                                                      | 5/8<br>Good |
